# Supplementary material for: Cocoa polyphenols and fiber modify colonic gene expression in rats
Source: PubMed Central journal article supplement (PMC5534200; doi:10.1007/s00394-016-1230-0), 2016-06-02
Supplement: 394_2016_1230_MOESM1_ESM.pdf [file 394_2016_1230_MOESM1_ESM.pdf]

| Symbol       | Genename                                                            | C10 group vs REF group |        | CF group vs REF group |              | I group vs REF group |              |
|--------------|---------------------------------------------------------------------|------------------------|--------|-----------------------|--------------|----------------------|--------------|
|              |                                                                     | logFC                  | pvalue | logFC                 | pvalue       | logFC                | p value      |
| Scgb1a1      | secretoglobin, family 1A, member 1 (uteroglobin)                    | 3.948                  | 0.000  | 1.716                 | 0.000        | 1.139                | 0.001        |
| Scnn1g       | sodium channel, nonvoltage-gated 1, gamma                           | 3.119                  | 0.000  | 1.133                 | 0.000        | 0.573                | 0.002        |
| Fxyd4        | FXYD domain-containing ion transport regulator 4                    | 2.583                  | 0.000  | 2.089                 | 0.000        | 0.718                | 0.000        |
| Slc15a1      | solute carrier family 15 (oligopeptide transporter), member 1       | 2.332                  | 0.000  | 1.388                 | 0.000        | 0.475                | 0.010        |
| Gbp1         | guanylate binding protein 1, interferon-inducible                   | 2.207                  | 0.000  | 1.662                 | 0.000        | 0.432                | 0.002        |
| Cyp2f4       | cytochrome P450, family 2, subfamily f, polypeptide 4               | 2.185                  | 0.000  | 1.436                 | 0.000        | 0.367                | 0.007        |
| Dpysl4       | dihydropyrimidinase-like 4                                          | 2.069                  | 0.000  | 1.387                 | 0.000        | 0.242                | <b>0.951</b> |
| Fmo2         | flavin containing monooxygenase 2                                   | 2.040                  | 0.000  | 1.007                 | 0.000        | 0.426                | 0.010        |
| Pdyn         | prodynorphin                                                        | 1.873                  | 0.000  | 0.194                 | <b>0.663</b> | 0.175                | <b>0.809</b> |
| Mt2A         | metallothionein 2A                                                  | 1.656                  | 0.000  | 0.644                 | 0.000        | -0.147               | 0.000        |
| Fmo2         | flavin containing monooxygenase 2                                   | 1.637                  | 0.000  | 0.826                 | 0.000        | 0.272                | 0.011        |
| RGD1561239   | similar to guanylate binding protein 1, interferon-inducible, 67kDa | 1.597                  | 0.000  | 1.787                 | 0.000        | 0.742                | 0.000        |
| Sftpd        | surfactant protein D                                                | 1.583                  | 0.000  | 0.163                 | 0.000        | 0.351                | 0.001        |
| Mme          | membrane metallo-endopeptidase                                      | 1.580                  | 0.000  | 0.636                 | 0.003        | 0.353                | 0.037        |
| Hoxd13       | homeo box D13                                                       | 1.575                  | 0.000  | 0.615                 | 0.001        | 0.100                | 0.019        |
| Chst5        | carbohydrate (N-acetylglucosamine 6-O) sulfotransferase 5           | 1.533                  | 0.000  | 0.591                 | 0.000        | 0.082                | 0.003        |
| Atp12a       | ATPase, H+/K+ transporting, nongastric, alpha polypeptide           | 1.457                  | 0.000  | 1.630                 | 0.000        | 0.500                | 0.001        |
| Thbs4        | thrombospondin 4                                                    | 1.450                  | 0.000  | 0.908                 | 0.000        | 0.302                | 0.023        |
| Hoxd10       | homeo box D10                                                       | 1.403                  | 0.000  | 0.668                 | 0.001        | 0.164                | <b>0.081</b> |
| RGD1561239   | similar to guanylate binding protein 1, interferon-inducible, 67kDa | 1.394                  | 0.000  | 1.294                 | 0.000        | 0.358                | 0.003        |
| Trpv1        | transient receptor potential cation channel, subfamily V, member 1  | 1.390                  | 0.000  | 0.749                 | 0.001        | 0.058                | <b>0.147</b> |
| Hoxb13       | homeo box B13                                                       | 1.358                  | 0.000  | 0.786                 | 0.000        | 0.101                | 0.001        |
| Spink3       | serine peptidase inhibitor, Kazal type 3                            | 1.338                  | 0.000  | 1.162                 | 0.000        | 0.463                | 0.003        |
| LOC687303    | similar to F35C5.3                                                  | 1.327                  | 0.000  | 0.734                 | 0.000        | 0.755                | 0.000        |
| Slc15a1      | solute carrier family 15 (oligopeptide transporter), member 1       | 1.323                  | 0.000  | 0.664                 | 0.001        | 0.142                | <b>0.827</b> |
| Abat         | 4-aminobutyrate aminotransferase                                    | 1.319                  | 0.000  | 1.272                 | 0.000        | 0.477                | 0.007        |
| Angptl4      | angiopoietin-like 4                                                 | 1.316                  | 0.000  | 0.914                 | 0.000        | 0.670                | 0.000        |
| Aox4         | aldehyde oxidase 4                                                  | 1.311                  | 0.000  | 0.054                 | <b>0.083</b> | 0.320                | <b>0.051</b> |
| Mt2A         | metallothionein 2A                                                  | 1.308                  | 0.000  | 0.522                 | 0.001        | -0.182               | 0.001        |
| B3gnt7       | UDP-GlcNAc:betaGal beta-1,3-N-acetylglucosaminyltransferase 7       | 1.265                  | 0.000  | 0.403                 | 0.001        | 0.019                | 0.012        |
| Trpv1        | transient receptor potential cation channel, subfamily V, member 1  | 1.260                  | 0.000  | 0.595                 | 0.002        | -0.065               | <b>0.169</b> |
| Pcsk9        | proprotein convertase subtilisin/kexin type 9                       | 1.253                  | 0.001  | 0.048                 | 0.035        | 0.063                | 0.023        |
| RGD1560608   | similar to novel protein                                            | 1.225                  | 0.000  | 0.759                 | 0.001        | 0.709                | 0.002        |
| Guca2b       | guanylate cyclase activator 2B                                      | 1.211                  | 0.000  | 0.811                 | 0.001        | 0.287                | <b>0.051</b> |
| Padi3        | peptidyl arginine deiminase, type III                               | 1.190                  | 0.000  | 0.832                 | 0.001        | 0.462                | 0.012        |
| Scnn1b       | sodium channel, nonvoltage-gated 1, beta                            | 1.181                  | 0.001  | 0.499                 | 0.010        | 0.057                | <b>0.641</b> |
| LOC287167    | globin, alpha                                                       | 1.178                  | 0.000  | 0.607                 | 0.001        | 0.296                | 0.023        |
| RGD1308274   | similar to very large inducible GTPase-1                            | 1.142                  | 0.000  | 0.073                 | <b>0.531</b> | 0.321                | 0.020        |
| Smc1b        | structural maintenance of chromosomes 1B                            | 1.133                  | 0.013  | 0.968                 | 0.006        | 0.031                | <b>0.548</b> |
| Pde7a        | phosphodiesterase 7A                                                | 1.129                  | 0.000  | 0.708                 | 0.001        | 0.405                | 0.027        |
| LOC100363350 | rCG58102-like                                                       | 1.126                  | 0.000  | 0.621                 | 0.001        | 0.446                | 0.004        |
| Gsta2        | glutathione S-transferase A2                                        | 1.111                  | 0.001  | 0.537                 | 0.004        | 0.157                | <b>0.534</b> |
| Slc20a1      | solute carrier family 20 (phosphate transporter), member 1          | 1.110                  | 0.000  | 0.624                 | 0.002        | 0.056                | <b>0.403</b> |
| RGD1310110   | similar to 3632451O06Rik protein                                    | 1.097                  | 0.000  | 0.410                 | 0.006        | <b>0.231</b>         | <b>0.053</b> |
| LOC689064    | beta-globin                                                         | 1.095                  | 0.000  | 1.024                 | 0.000        | 0.501                | 0.003        |
| Rnase1       | ribonuclease, RNase A family, 1 (pancreatic)                        | 1.094                  | 0.000  | 1.063                 | 0.000        | 1.218                | 0.001        |
| Slc15a1      | solute carrier family 15 (oligopeptide transporter), member 1       | 1.092                  | 0.000  | 0.665                 | 0.001        | <b>0.206</b>         | <b>0.940</b> |
| Dnase1       | deoxyribonuclease I                                                 | 1.088                  | 0.000  | 1.087                 | 0.000        | <b>0.124</b>         | <b>0.483</b> |
| Pde7a        | phosphodiesterase 7A                                                | 1.077                  | 0.000  | 0.583                 | 0.003        | <b>0.217</b>         | <b>0.718</b> |
| siat7D       | alpha-2,6-sialyltransferase ST6GalNAc IV                            | 1.058                  | 0.000  | 0.363                 | 0.020        | <b>0.096</b>         | <b>0.380</b> |

|            |                                                                  |       |       |        |              |               |              |
|------------|------------------------------------------------------------------|-------|-------|--------|--------------|---------------|--------------|
| Serpinc1   | serpin peptidase inhibitor, clade C (antithrombin), member 1     | 1.053 | 0.000 | 0.873  | 0.000        | 0.469         | 0.013        |
| LOC494499  | LOC494499 protein                                                | 1.029 | 0.001 | 0.576  | 0.003        | <b>0.276</b>  | <b>0.051</b> |
| Fbxl13     | F-box and leucine-rich repeat protein 13                         | 1.028 | 0.000 | 1.009  | 0.000        | <b>0.067</b>  | <b>0.595</b> |
| Alox15     | arachidonate 15-lipoxygenase                                     | 1.028 | 0.000 | 0.387  | 0.018        | <b>0.191</b>  | <b>0.951</b> |
| Creg1      | cellular repressor of E1A-stimulated genes 1                     | 1.021 | 0.000 | 0.406  | 0.019        | <b>-0.008</b> | <b>0.515</b> |
| Rnase1l2   | ribonuclease, RNase A family, 1-like 2 (pancreatic)              | 1.010 | 0.000 | 0.857  | 0.000        | 1.012         | 0.001        |
| Alas2      | aminolevulinatase, delta-, synthase 2                            | 1.007 | 0.000 | 0.997  | 0.000        | 0.452         | 0.005        |
| LOC686412  | similar to sal-like 4 isoform a                                  | 0.984 | 0.000 | 0.441  | 0.013        | -0.128        | 0.036        |
| Best2      | bestrophin 2                                                     | 0.984 | 0.000 | 1.018  | 0.000        | 0.320         | 0.006        |
| Mt1a       | metallothionein 1a                                               | 0.978 | 0.000 | 0.388  | 0.002        | -0.372        | 0.002        |
| S100a5     | S100 calcium binding protein A5                                  | 0.973 | 0.001 | 0.431  | <b>0.050</b> | 0.328         | 0.045        |
| Ces1c      | carboxylesterase 1C                                              | 0.966 | 0.006 | 0.617  | 0.002        | 0.291         | <b>0.929</b> |
| G6pc       | glucose-6-phosphatase, catalytic subunit                         | 0.963 | 0.010 | 0.129  | <b>0.851</b> | -0.011        | <b>0.537</b> |
| Tmem150c   | transmembrane protein 150C                                       | 0.957 | 0.000 | 0.608  | 0.002        | 0.294         | 0.049        |
| LOC498793  | similar to inter-alpha-inhibitor H2 chain                        | 0.952 | 0.000 | 0.822  | 0.001        | 0.308         | 0.033        |
| Np4        | defensin NP-4 precursor                                          | 0.943 | 0.045 | -0.019 | <b>0.502</b> | 0.570         | <b>0.110</b> |
| Sval1      | seminal vesicle antigen-like 1                                   | 0.943 | 0.000 | 0.780  | 0.000        | 0.206         | 0.000        |
| Dpp4       | dipeptidylpeptidase 4                                            | 0.943 | 0.000 | 0.455  | 0.010        | 0.164         | <b>0.496</b> |
| Aqp8       | aquaporin 8                                                      | 0.925 | 0.000 | 0.491  | 0.000        | 0.681         | 0.000        |
| Tgm3       | transglutaminase 3, E polypeptide                                | 0.922 | 0.000 | 0.669  | 0.001        | -0.016        | 0.017        |
| Hba-a2     | hemoglobin alpha, adult chain 2                                  | 0.919 | 0.000 | 0.992  | 0.000        | 0.483         | 0.004        |
| Hbb        | hemoglobin, beta                                                 | 0.918 | 0.000 | 0.843  | 0.000        | 0.537         | 0.002        |
| Fkbp5      | FK506 binding protein 5                                          | 0.918 | 0.000 | 0.643  | 0.001        | 0.670         | 0.001        |
| Dpp4       | dipeptidylpeptidase 4                                            | 0.915 | 0.000 | 0.345  | 0.028        | 0.152         | <b>0.084</b> |
| Tcf7       | transcription factor 7, T-cell specific                          | 0.904 | 0.004 | 0.405  | 0.016        | 1.006         | 0.002        |
| Slc46a1    | solute carrier family 46 (folate transporter), member 1          | 0.890 | 0.003 | 0.663  | 0.002        | 0.243         | <b>0.690</b> |
| Pdzd3      | PDZ domain containing 3                                          | 0.888 | 0.000 | 0.267  | <b>0.938</b> | -0.124        | <b>0.728</b> |
| Zyg11b     | zyg-11 homolog B (C. elegans)                                    | 0.887 | 0.000 | -0.628 | 0.018        | 0.076         | <b>0.059</b> |
| Msh5       | mutS homolog 5 (E. coli)                                         | 0.883 | 0.000 | 0.673  | 0.001        | 0.369         | 0.023        |
| Hbe2       | hemoglobin, epsilon 2                                            | 0.878 | 0.000 | 0.963  | 0.000        | 0.533         | 0.002        |
| Dio1       | deiodinase, iodothyronine, type I                                | 0.872 | 0.001 | 0.218  | 0.039        | -0.045        | 0.037        |
| Papss2     | 3'-phosphoadenosine 5'-phosphosulfate synthase 2                 | 0.867 | 0.000 | 0.765  | 0.001        | 0.459         | 0.011        |
| Fam84a     | family with sequence similarity 84, member A                     | 0.859 | 0.000 | 0.535  | 0.004        | 0.348         | 0.023        |
| Foxq1      | forkhead box Q1                                                  | 0.857 | 0.000 | 0.444  | 0.003        | 0.155         | 0.035        |
| Ppat       | phosphoribosyl pyrophosphate amidotransferase                    | 0.852 | 0.000 | 0.614  | 0.002        | 0.349         | 0.018        |
| Hbb-b1     | hemoglobin, beta adult major chain                               | 0.848 | 0.000 | 0.981  | 0.000        | 0.504         | 0.003        |
| RGD1309350 | similar to transthyretin (4L369)                                 | 0.844 | 0.000 | 0.324  | <b>0.815</b> | -0.012        | <b>0.395</b> |
| Mep1b      | meprin 1 beta                                                    | 0.843 | 0.000 | 0.342  | 0.029        | 0.060         | <b>0.682</b> |
| Gadd45b    | growth arrest and DNA-damage-inducible, beta                     | 0.841 | 0.000 | 0.521  | 0.009        | 0.355         | <b>0.783</b> |
| Papss2     | 3'-phosphoadenosine 5'-phosphosulfate synthase 2                 | 0.839 | 0.000 | 0.681  | 0.001        | 0.408         | 0.012        |
| Pdzk1ip1   | PDZK1 interacting protein 1                                      | 0.836 | 0.001 | 0.110  | 0.042        | -0.812        | 0.000        |
| Ly6al      | lymphocyte antigen 6 complex, locus A-like                       | 0.833 | 0.000 | 0.240  | <b>0.850</b> | -0.216        | <b>0.930</b> |
| Hbb        | hemoglobin, beta                                                 | 0.831 | 0.000 | 0.994  | 0.000        | 0.613         | 0.001        |
| Arg2       | arginase type II                                                 | 0.829 | 0.000 | 0.295  | 0.014        | 0.138         | 0.043        |
| Sval1      | seminal vesicle antigen-like 1                                   | 0.826 | 0.000 | 0.807  | 0.000        | 0.217         | 0.000        |
| Fam55b     | family with sequence similarity 55, member B                     | 0.825 | 0.000 | 0.375  | 0.012        | 0.117         | <b>0.073</b> |
| LOC691700  | similar to heparan sulfate D-glucosaminyl 3-O-sulfotransferase 4 | 0.823 | 0.000 | 0.345  | 0.031        | 0.278         | <b>0.055</b> |
| Hgfac      | hepatocyte growth factor activator                               | 0.822 | 0.000 | 0.217  | <b>0.717</b> | 0.106         | <b>0.631</b> |
| Hbb-b1     | hemoglobin, beta adult major chain                               | 0.822 | 0.000 | 0.953  | 0.000        | 0.537         | 0.002        |
| Tfcp2l1    | transcription factor CP2-like 1                                  | 0.819 | 0.000 | 0.426  | 0.011        | 0.409         | 0.009        |
| LOC499229  | similar to very large inducible GTPase 1 isoform A               | 0.814 | 0.000 | -0.126 | <b>0.250</b> | 0.371         | 0.004        |
| Ceacam10   | carcinoembryonic antigen-related cell adhesion molecule 10       | 0.812 | 0.000 | 0.268  | 0.010        | 0.337         | 0.017        |
| Spink3     | serine peptidase inhibitor, Kazal type 3                         | 0.809 | 0.001 | 1.023  | 0.000        | 0.284         | 0.021        |
| Krt75      | keratin 75                                                       | 0.801 | 0.001 | 0.424  | 0.015        | 0.083         | <b>0.493</b> |
| Spata22    | spermatogenesis associated 22                                    | 0.797 | 0.001 | 1.203  | 0.000        | 0.507         | 0.003        |
| Cmah       | cytidine monophosphate-N-acetylneuraminic acid hydroxylase       | 0.787 | 0.000 | -0.230 | 0.004        | -0.391        | 0.002        |
| Ttc12      | tetratricopeptide repeat domain 12                               | 0.778 | 0.000 | 0.329  | 0.029        | 0.055         | <b>0.503</b> |
| Hba-a2     | hemoglobin alpha, adult chain 2                                  | 0.778 | 0.000 | 0.908  | 0.000        | 0.396         | 0.013        |
| Hhex       | hematopoietically expressed homeobox                             | 0.775 | 0.002 | 0.461  | 0.019        | 0.285         | <b>0.091</b> |

|              |                                                                                       |       |       |        |              |        |              |
|--------------|---------------------------------------------------------------------------------------|-------|-------|--------|--------------|--------|--------------|
| Tef          | thyrotrophic embryonic factor                                                         | 0.774 | 0.000 | 0.370  | 0.017        | 0.079  | <b>0.687</b> |
| Cd247        | Cd247 molecule                                                                        | 0.773 | 0.002 | 0.856  | 0.000        | 1.010  | 0.000        |
| Tmem71       | transmembrane protein 71                                                              | 0.763 | 0.023 | 0.222  | 0.046        | 0.066  | <b>0.141</b> |
| Tm7sf2       | transmembrane 7 superfamily member 2                                                  | 0.759 | 0.001 | 0.287  | 0.022        | 0.020  | <b>0.111</b> |
| Ckmt1        | creatine kinase, mitochondrial 1                                                      | 0.754 | 0.000 | 0.242  | <b>0.731</b> | -0.056 | <b>0.568</b> |
| Rnf125       | ring finger protein 125                                                               | 0.752 | 0.001 | 0.166  | <b>0.850</b> | 0.434  | 0.007        |
| Trpv3        | transient receptor potential cation channel, subfamily V, member 3                    | 0.747 | 0.001 | 1.045  | 0.000        | 0.521  | 0.008        |
| Unc119       | UNC-119 homolog (C. elegans)                                                          | 0.746 | 0.001 | 0.505  | 0.005        | 0.393  | 0.021        |
| Cxcl13       | chemokine (C-X-C motif) ligand 13                                                     | 0.738 | 0.000 | 1.052  | 0.000        | 1.003  | 0.000        |
| Arl4d        | ADP-ribosylation factor-like 4D                                                       | 0.725 | 0.001 | 0.068  | <b>0.566</b> | -0.162 | <b>0.816</b> |
| Prp2         | proline rich protein 2                                                                | 0.722 | 0.001 | 0.506  | 0.005        | -0.120 | <b>0.533</b> |
| Sftpc        | surfactant protein C                                                                  | 0.722 | 0.008 | 0.399  | <b>0.592</b> | -0.098 | <b>0.841</b> |
| Epb41l3      | erythrocyte membrane protein band 4.1-like 3                                          | 0.719 | 0.000 | 0.260  | <b>0.892</b> | 0.048  | <b>0.701</b> |
| Zbtb16       | zinc finger and BTB domain containing 16                                              | 0.719 | 0.002 | 0.376  | 0.026        | 0.510  | 0.003        |
| Shisa8       | shisa homolog 8 (Xenopus laevis)                                                      | 0.716 | 0.000 | 0.297  | <b>0.960</b> | 0.218  | <b>0.952</b> |
| Fam50b       | family with sequence similarity 50, member B                                          | 0.713 | 0.024 | 0.567  | 0.045        | -0.219 | <b>0.938</b> |
| Tmem37       | transmembrane protein 37                                                              | 0.711 | 0.001 | 0.428  | 0.013        | 0.129  | <b>0.820</b> |
| Slc26a2      | solute carrier family 26 (sulfate transporter), member 2                              | 0.706 | 0.002 | 0.086  | <b>0.306</b> | 0.226  | <b>0.921</b> |
| Eno3         | enolase 3, beta, muscle                                                               | 0.706 | 0.001 | 1.202  | 0.000        | 0.342  | 0.006        |
| Tnni1        | troponin I type 1 (skeletal, slow)                                                    | 0.704 | 0.005 | 0.715  | 0.004        | 0.226  | <b>0.858</b> |
| Depdc7       | DEP domain containing 7                                                               | 0.702 | 0.000 | 0.244  | <b>0.821</b> | 0.272  | 0.040        |
| Fam84a       | family with sequence similarity 84, member A                                          | 0.701 | 0.001 | 0.589  | 0.001        | 0.408  | 0.013        |
| Txnip        | thioredoxin interacting protein                                                       | 0.699 | 0.000 | 0.343  | <b>0.725</b> | 0.270  | <b>0.915</b> |
| Banp         | Btg3 associated nuclear protein                                                       | 0.696 | 0.001 | 0.726  | 0.000        | 0.726  | 0.000        |
| Ccdc153      | coiled-coil domain containing 153                                                     | 0.690 | 0.001 | 0.280  | <b>0.895</b> | 0.084  | <b>0.414</b> |
| Il18         | interleukin 18                                                                        | 0.690 | 0.001 | 0.154  | <b>0.527</b> | 0.267  | 0.033        |
| LOC680692    | similar to Golgi phosphoprotein 2 (Golgi membrane protein GP73)                       | 0.689 | 0.001 | 0.138  | <b>0.632</b> | -0.017 | <b>0.480</b> |
| Fam111a      | family with sequence similarity 111, member A                                         | 0.687 | 0.000 | 0.552  | 0.001        | -1.022 | 0.000        |
| RGD1562641   | similar to hypothetical protein 4930474N05                                            | 0.687 | 0.002 | 0.390  | 0.034        | -0.792 | 0.005        |
| RGD1311575   | hypothetical LOC289568                                                                | 0.686 | 0.002 | 0.230  | <b>0.692</b> | 0.006  | <b>0.547</b> |
| Unc13c       | unc-13 homolog C (C. elegans)                                                         | 0.686 | 0.041 | 0.721  | 0.018        | 0.096  | <b>0.879</b> |
| Clec2e       | C-type lectin domain family 2, member E                                               | 0.685 | 0.001 | 0.020  | <b>0.316</b> | 0.022  | <b>0.462</b> |
| LOC305806    | similar to glutaredoxin 1 (thioltransferase); glutaredoxin                            | 0.685 | 0.028 | 0.117  | <b>0.660</b> | 0.476  | 0.007        |
| Tpt1         | tumor protein, translationally-controlled 1                                           | 0.685 | 0.001 | 0.330  | 0.035        | 0.004  | <b>0.162</b> |
| Slc4a1       | solute carrier family 4 (anion exchanger), member 1                                   | 0.685 | 0.000 | 0.261  | <b>0.864</b> | 0.027  | <b>0.631</b> |
| Uncx         | UNC homeobox                                                                          | 0.683 | 0.003 | 1.093  | 0.000        | 0.283  | 0.023        |
| LOC300024    | similar to Ly6-B antigen gene                                                         | 0.680 | 0.001 | 0.173  | <b>0.688</b> | -0.291 | <b>0.962</b> |
| Cideb        | cell death-inducing DFFA-like effector b                                              | 0.679 | 0.001 | -0.169 | <b>0.782</b> | -0.306 | 0.020        |
| Foxa2        | forkhead box A2                                                                       | 0.679 | 0.001 | 0.166  | <b>0.614</b> | 0.192  | <b>0.813</b> |
| LOC680787    | rCG56785-like                                                                         | 0.678 | 0.037 | 0.609  | 0.023        | -0.400 | 0.013        |
| Actc1        | actin, alpha, cardiac muscle 1                                                        | 0.675 | 0.002 | 0.152  | <b>0.821</b> | -0.029 | <b>0.517</b> |
| Rcctb1       | regulator of chromosome condensation (RCC1) and BTB (POZ) domain containing protein 1 | 0.674 | 0.001 | 0.406  | 0.029        | 0.282  | <b>0.051</b> |
| Cyp3a18      | cytochrome P450, family 3, subfamily a, polypeptide 18                                | 0.674 | 0.002 | 0.224  | <b>0.910</b> | -0.053 | <b>0.561</b> |
| Cib2         | calcium and integrin binding family member 2                                          | 0.672 | 0.002 | 0.174  | <b>0.827</b> | -0.248 | <b>0.923</b> |
| S100a5       | S100 calcium binding protein A5                                                       | 0.670 | 0.001 | 0.268  | 0.018        | 0.221  | 0.027        |
| Tnn          | tenascin N                                                                            | 0.669 | 0.002 | 0.716  | 0.005        | 1.033  | 0.002        |
| Tcf7l2       | transcription factor 7-like 2 (T-cell specific, HMG-box)                              | 0.668 | 0.002 | 0.139  | <b>0.376</b> | 0.361  | 0.022        |
| LOC100361909 | eosinophil-associated ribonuclease 3-like                                             | 0.667 | 0.009 | 0.418  | 0.008        | 0.060  | <b>0.573</b> |
| Epb41l3      | erythrocyte membrane protein band 4.1-like 3                                          | 0.667 | 0.001 | 0.216  | <b>0.852</b> | 0.039  | <b>0.628</b> |
| Cd177        | CD177 molecule                                                                        | 0.666 | 0.001 | -0.042 | <b>0.417</b> | 0.039  | <b>0.438</b> |
| Pbld         | phenazine biosynthesis-like protein domain containing                                 | 0.665 | 0.001 | 0.227  | <b>0.887</b> | -0.147 | <b>0.706</b> |
| Hist1h1b     | histone cluster 1, H1b                                                                | 0.665 | 0.001 | 0.114  | <b>0.765</b> | 0.174  | <b>0.880</b> |
| Fam25a       | family with sequence similarity 25, member A                                          | 0.665 | 0.018 | 0.248  | <b>0.737</b> | 0.270  | 0.041        |
| Inhbb        | inhibin beta-B                                                                        | 0.663 | 0.002 | 0.069  | <b>0.153</b> | -0.058 | <b>0.271</b> |
| LOC500300    | similar to hypothetical protein MGC6835                                               | 0.663 | 0.002 | 1.284  | 0.000        | 0.857  | 0.000        |
| Eif4ebp3     | eukaryotic translation initiation factor 4E binding protein 3                         | 0.662 | 0.001 | 0.250  | <b>0.953</b> | 0.094  | <b>0.779</b> |

|            |                                                                                          |       |       |        |              |        |              |
|------------|------------------------------------------------------------------------------------------|-------|-------|--------|--------------|--------|--------------|
| Cyp4f17    | cytochrome P450, family 4, subfamily f, polypeptide 17                                   | 0.659 | 0.000 | 0.309  | 0.005        | 0.268  | 0.003        |
| Ccr12      | chemokine (C-C motif) receptor-like 2                                                    | 0.658 | 0.002 | 0.383  | 0.019        | -0.030 | <b>0.422</b> |
| Gnat2      | guanine nucleotide binding protein (G protein), alpha transducing activity polypeptide 2 | 0.657 | 0.005 | 0.493  | 0.020        | 0.114  | <b>0.796</b> |
| Rab20      | RAB20, member RAS oncogene family                                                        | 0.655 | 0.001 | 0.389  | 0.015        | 0.235  | <b>0.933</b> |
| Vwa5b2     | von Willebrand factor A domain containing 5B2                                            | 0.652 | 0.001 | 0.127  | <b>0.658</b> | 0.116  | <b>0.575</b> |
| Slc25a45   | solute carrier family 25, member 45                                                      | 0.650 | 0.003 | 0.665  | 0.003        | 0.281  | <b>0.051</b> |
| P2ry6      | pyrimidinergic receptor P2Y, G-protein coupled, 6                                        | 0.650 | 0.002 | 0.525  | 0.004        | 0.287  | <b>0.053</b> |
| RT1-CE12   | RT1 class I, locus CE12                                                                  | 0.648 | 0.002 | 0.174  | <b>0.537</b> | -0.439 | 0.004        |
| Pigz1      | phosphatidylinositol glycan, class Z-like 1                                              | 0.644 | 0.000 | 0.023  | 0.009        | -0.459 | 0.001        |
| Pm20d1     | peptidase M20 domain containing 1                                                        | 0.644 | 0.004 | 0.252  | <b>0.841</b> | 0.017  | <b>0.493</b> |
| Hist1h1b   | histone cluster 1, H1b                                                                   | 0.641 | 0.002 | 0.202  | <b>0.889</b> | 0.220  | <b>0.922</b> |
| Anxa3      | annexin A3                                                                               | 0.640 | 0.001 | 0.103  | <b>0.427</b> | -0.087 | <b>0.287</b> |
| Ndr2       | N-myc downstream regulated gene 2                                                        | 0.639 | 0.001 | 0.283  | <b>0.802</b> | 0.128  | <b>0.692</b> |
| LOC367436  | similar to Y-linked testis-specific protein                                              | 0.634 | 0.008 | 0.177  | <b>0.468</b> | 0.501  | 0.002        |
| Hist3h2ba  | histone cluster 3, H2ba                                                                  | 0.634 | 0.003 | 0.173  | <b>0.790</b> | 0.118  | <b>0.825</b> |
| Enpp2      | ectonucleotide pyrophosphatase/phosphodiesterase 2                                       | 0.633 | 0.000 | 0.350  | 0.003        | 0.507  | 0.006        |
| Bsnd       | Bartrter syndrome, infantile, with sensorineural deafness (Barttin)                      | 0.633 | 0.001 | 0.497  | 0.006        | 0.040  | <b>0.691</b> |
| Gpr150     | G protein-coupled receptor 150                                                           | 0.630 | 0.037 | 0.462  | 0.011        | 0.391  | 0.038        |
| Pou2af1    | POU class 2 associating factor 1                                                         | 0.629 | 0.001 | 0.607  | 0.001        | 1.184  | 0.000        |
| Cbln1      | cerebellin 1 precursor                                                                   | 0.626 | 0.008 | 0.248  | <b>0.063</b> | 0.190  | <b>0.092</b> |
| Lrrc8e     | leucine rich repeat containing 8 family, member E                                        | 0.625 | 0.001 | 0.223  | <b>0.743</b> | -0.101 | <b>0.727</b> |
| Slc6a14    | solute carrier family 6 (amino acid transporter), member 14                              | 0.622 | 0.001 | 0.607  | 0.001        | 0.453  | 0.007        |
| Slc25a34   | solute carrier family 25, member 34                                                      | 0.621 | 0.002 | -0.074 | <b>0.707</b> | -0.160 | <b>0.716</b> |
| Taok3      | TAO kinase 3                                                                             | 0.621 | 0.003 | 0.181  | <b>0.334</b> | 0.407  | 0.013        |
| Sgk1       | serum/glucocorticoid regulated kinase 1                                                  | 0.619 | 0.001 | 0.063  | <b>0.160</b> | -0.283 | 0.026        |
| Tmem132c   | transmembrane protein 132C                                                               | 0.616 | 0.002 | 0.589  | 0.002        | -0.048 | <b>0.524</b> |
| Cyp4a8     | cytochrome P450, family 4, subfamily a, polypeptide 8                                    | 0.616 | 0.009 | 0.506  | 0.014        | 0.743  | 0.000        |
| Rt1.aa     | MHC class I RT1.Aa alpha-chain                                                           | 0.615 | 0.003 | 0.472  | 0.003        | 0.605  | 0.001        |
| Wnt16      | wingless-type MMTV integration site family, member 16                                    | 0.615 | 0.003 | 0.453  | 0.012        | 0.496  | 0.005        |
| RT1-CE14   | RT1 class I, locus CE14                                                                  | 0.614 | 0.008 | 0.426  | 0.009        | 0.520  | 0.003        |
| Sh3d21     | SH3 domain containing 21                                                                 | 0.612 | 0.006 | 0.346  | <b>0.972</b> | 0.389  | 0.020        |
| Pck1       | phosphoenolpyruvate carboxykinase 1 (soluble)                                            | 0.609 | 0.004 | -0.424 | 0.010        | -0.327 | <b>0.972</b> |
| Ccr7       | chemokine (C-C motif) receptor 7                                                         | 0.608 | 0.008 | 0.523  | 0.020        | 0.727  | 0.004        |
| Cabyr      | calcium binding tyrosine-(Y)-phosphorylation regulated                                   | 0.607 | 0.004 | 0.433  | 0.008        | 0.168  | <b>0.810</b> |
| Gpr160     | G protein-coupled receptor 160                                                           | 0.607 | 0.004 | 0.078  | <b>0.821</b> | 0.003  | <b>0.457</b> |
| Ppp1r9a    | protein phosphatase 1, regulatory subunit 9A                                             | 0.607 | 0.003 | 0.503  | 0.008        | 0.358  | 0.029        |
| Bco2       | beta-carotene oxygenase 2                                                                | 0.607 | 0.005 | 0.196  | <b>0.757</b> | 0.037  | <b>0.422</b> |
| Slc22a5    | solute carrier family 22 (organic cation/carnitine transporter), member 5                | 0.605 | 0.005 | 0.004  | <b>0.238</b> | -0.119 | <b>0.495</b> |
| RT1-CE16   | RT1 class I, locus CE16                                                                  | 0.605 | 0.001 | 0.378  | 0.005        | 0.436  | 0.006        |
| Slc34a2    | solute carrier family 34 (sodium phosphate), member 2                                    | 0.604 | 0.003 | 0.613  | 0.002        | 0.269  | <b>0.062</b> |
| Grin2d     | glutamate receptor, ionotropic, N-methyl D-aspartate 2D                                  | 0.601 | 0.002 | 0.301  | <b>0.942</b> | 0.185  | <b>0.766</b> |
| Grap       | GRB2-related adaptor protein                                                             | 0.600 | 0.014 | 0.493  | 0.021        | 0.695  | 0.006        |
| Cyp2d4     | cytochrome P450, family 2, subfamily d, polypeptide 4                                    | 0.599 | 0.003 | 0.391  | 0.025        | 0.104  | <b>0.805</b> |
| Lef1       | lymphoid enhancer binding factor 1                                                       | 0.599 | 0.012 | 0.308  | <b>0.065</b> | 0.575  | 0.007        |
| Klf11      | Kruppel-like factor 11                                                                   | 0.598 | 0.002 | 0.342  | <b>0.984</b> | 0.321  | 0.039        |
| Ces2g      | carboxylesterase 2G                                                                      | 0.598 | 0.002 | 0.270  | <b>0.660</b> | 0.007  | <b>0.449</b> |
| Ttc36      | tetratricopeptide repeat domain 36                                                       | 0.596 | 0.005 | 1.113  | 0.000        | 0.281  | 0.016        |
| LOC679149  | similar to carboxylesterase 2 (intestine, liver)                                         | 0.596 | 0.001 | 0.129  | <b>0.070</b> | -0.240 | 0.018        |
| Tfcp2l1    | transcription factor CP2-like 1                                                          | 0.595 | 0.002 | 0.213  | <b>0.738</b> | 0.291  | <b>0.965</b> |
| Tmem140    | transmembrane protein 140                                                                | 0.592 | 0.002 | 0.036  | <b>0.340</b> | -0.036 | <b>0.552</b> |
| Ms4a10     | membrane-spanning 4-domains, subfamily A, member 10                                      | 0.591 | 0.007 | 0.293  | <b>0.504</b> | -0.311 | <b>0.980</b> |
| Ptprr      | protein tyrosine phosphatase, receptor type, R                                           | 0.591 | 0.002 | 0.442  | 0.008        | 0.003  | <b>0.325</b> |
| RGD1304644 | similar to RIKEN cDNA 2310046K01                                                         | 0.589 | 0.002 | 0.293  | <b>0.722</b> | -0.058 | <b>0.450</b> |
| Slc41a3    | solute carrier family 41, member 3                                                       | 0.589 | 0.002 | 0.200  | <b>0.770</b> | -0.008 | <b>0.411</b> |

|            |                                                                                                               |       |       |        |              |        |              |
|------------|---------------------------------------------------------------------------------------------------------------|-------|-------|--------|--------------|--------|--------------|
| St6galnac2 | ST6 (alpha-N-acetyl-neuraminyl-2,3-beta-galactosyl-1,3)-N-acetylgalactosaminide alpha-2,6-sialyltransferase 2 | 0.589 | 0.003 | 0.088  | <b>0.799</b> | -0.201 | <b>0.905</b> |
| Slc45a3    | solute carrier family 45, member 3                                                                            | 0.586 | 0.008 | 0.180  | <b>0.736</b> | 0.062  | <b>0.397</b> |
| Fam159b    | family with sequence similarity 159, member B                                                                 | 0.584 | 0.005 | 0.861  | 0.000        | 0.345  | 0.010        |
| Qrich2     | glutamine rich 2                                                                                              | 0.581 | 0.002 | 0.218  | 0.026        | 0.036  | <b>0.083</b> |
| Peg12      | paternally expressed 12                                                                                       | 0.581 | 0.003 | 0.199  | <b>0.854</b> | 0.039  | <b>0.614</b> |
| LOC681325  | hypothetical protein LOC681325                                                                                | 0.580 | 0.015 | 0.494  | 0.010        | 0.620  | 0.013        |
| B3gnt8     | UDP-GlcNAc:betaGal beta-1,3-N-acetylglucosaminyltransferase 8                                                 | 0.580 | 0.001 | 0.120  | <b>0.394</b> | -0.039 | <b>0.194</b> |
| RGD1310587 | similar to hypothetical protein FLJ14146                                                                      | 0.576 | 0.002 | -0.296 | <b>0.853</b> | -0.385 | 0.021        |
| Ccnd2      | cyclin D2                                                                                                     | 0.575 | 0.002 | 0.605  | 0.001        | 0.483  | 0.005        |
| Acat3      | acetyl-Coenzyme A acetyltransferase 3                                                                         | 0.575 | 0.002 | 0.015  | <b>0.299</b> | -0.128 | 0.044        |
| Hoxd9      | homeo box D9                                                                                                  | 0.574 | 0.011 | 0.455  | 0.007        | 0.157  | <b>0.809</b> |
| Clcnkb     | chloride channel Kb                                                                                           | 0.573 | 0.002 | 0.064  | <b>0.332</b> | -0.572 | 0.002        |
| Fads3      | fatty acid desaturase 3                                                                                       | 0.573 | 0.004 | 0.439  | 0.009        | 0.177  | <b>0.525</b> |
| Ctse       | cathepsin E                                                                                                   | 0.573 | 0.002 | 0.202  | <b>0.811</b> | -0.037 | <b>0.386</b> |
| LOC686432  | hypothetical protein LOC686432                                                                                | 0.570 | 0.003 | -0.137 | <b>0.771</b> | -0.279 | <b>0.959</b> |
| Cyp2j3     | cytochrome P450, family 2, subfamily j, polypeptide 3                                                         | 0.568 | 0.004 | 0.030  | <b>0.415</b> | 0.128  | <b>0.853</b> |
| Hist3h2bb  | histone cluster 3, H2bb                                                                                       | 0.568 | 0.005 | 0.198  | <b>0.859</b> | 0.027  | <b>0.642</b> |
| Pdk4       | pyruvate dehydrogenase kinase, isozyme 4                                                                      | 0.567 | 0.003 | 0.352  | 0.031        | 0.284  | <b>0.054</b> |
| RGD1561465 | similar to RIKEN cDNA 2900010J23                                                                              | 0.567 | 0.005 | 0.532  | 0.008        | -0.099 | <b>0.397</b> |
| LOC679861  | similar to MIC2 like 1                                                                                        | 0.565 | 0.002 | 0.396  | 0.010        | 0.239  | 0.030        |
| Gfpt2      | glutamine-fructose-6-phosphate transaminase 2                                                                 | 0.565 | 0.004 | 0.199  | <b>0.790</b> | 0.109  | <b>0.744</b> |
| Kank3      | KN motif and ankyrin repeat domains 3                                                                         | 0.564 | 0.005 | 0.396  | 0.018        | 0.115  | <b>0.684</b> |
| Vom2r73    | vomer nasal 2 receptor, 73                                                                                    | 0.562 | 0.004 | 0.423  | 0.032        | 0.043  | <b>0.379</b> |
| RGD1308305 | similar to RIKEN cDNA 5430400H23                                                                              | 0.562 | 0.008 | 0.405  | 0.016        | -0.208 | <b>0.578</b> |
| Tle4       | transducin-like enhancer of split 4 (E(sp1) homolog, Drosophila)                                              | 0.562 | 0.005 | 0.546  | 0.002        | 0.599  | 0.001        |
| Upp1       | uridine phosphorylase 1                                                                                       | 0.562 | 0.002 | -0.041 | <b>0.621</b> | -0.008 | <b>0.442</b> |
| RGD1306227 | similar to 4833420G17Rik protein                                                                              | 0.561 | 0.003 | 0.070  | <b>0.621</b> | -0.052 | <b>0.625</b> |
| Slc25a30   | solute carrier family 25, member 30                                                                           | 0.561 | 0.004 | 0.187  | <b>0.606</b> | 0.124  | <b>0.490</b> |
| Fcrl1      | Fc receptor-like 1                                                                                            | 0.561 | 0.001 | 0.818  | 0.000        | 0.989  | 0.001        |
| Cr2        | complement receptor 2                                                                                         | 0.561 | 0.001 | 0.678  | 0.001        | 0.951  | 0.000        |
| Ly6d       | lymphocyte antigen 6 complex, locus D                                                                         | 0.560 | 0.015 | 0.443  | 0.033        | 0.420  | 0.029        |
| Fam111a    | family with sequence similarity 111, member A                                                                 | 0.559 | 0.002 | 0.475  | 0.002        | -0.930 | 0.000        |
| RGD1563652 | similar to novel MAM domain containing protein                                                                | 0.558 | 0.006 | -0.246 | 0.019        | 0.136  | <b>0.171</b> |
| Acadsb     | acyl-CoA dehydrogenase, short/branched chain                                                                  | 0.558 | 0.002 | 0.262  | 0.030        | 0.724  | 0.000        |
| Cbx2       | chromobox homolog 2                                                                                           | 0.557 | 0.010 | 0.198  | <b>0.881</b> | 0.065  | <b>0.289</b> |
| Stk39      | serine threonine kinase 39                                                                                    | 0.557 | 0.003 | 0.245  | <b>0.847</b> | -0.037 | <b>0.590</b> |
| Pcmt2      | protein-L-isoaspartate (D-aspartate) O-methyltransferase domain containing 2                                  | 0.556 | 0.003 | 0.138  | <b>0.927</b> | 0.228  | <b>0.956</b> |
| Vpreb3     | pre-B lymphocyte 3                                                                                            | 0.554 | 0.004 | 0.506  | 0.005        | 0.858  | 0.001        |
| A1i3       | alpha-1-inhibitor III                                                                                         | 0.554 | 0.017 | 0.128  | <b>0.857</b> | -0.010 | <b>0.517</b> |
| ErbB3      | v-erb-b2 erythroblastic leukemia viral oncogene homolog 3 (avian)                                             | 0.553 | 0.003 | -0.009 | <b>0.618</b> | -0.065 | <b>0.773</b> |
| Osgin1     | oxidative stress induced growth inhibitor 1                                                                   | 0.552 | 0.006 | 0.236  | <b>0.899</b> | 0.010  | <b>0.469</b> |
| Dlk1       | delta-like 1 homolog (Drosophila)                                                                             | 0.552 | 0.004 | 1.109  | 0.000        | 0.311  | 0.008        |
| Akr1c1     | aldo-keto reductase family 1, member C-like 1                                                                 | 0.551 | 0.003 | 0.868  | 0.000        | 0.425  | 0.004        |
| Kcns2      | potassium voltage-gated channel, delayed-rectifier, subfamily S, member 2                                     | 0.551 | 0.007 | 0.743  | 0.002        | 0.254  | 0.047        |
| Atp2c2     | ATPase, Ca <sup>++</sup> transporting, type 2C, member 2                                                      | 0.551 | 0.004 | 0.103  | <b>0.506</b> | 0.175  | <b>0.801</b> |
| LOC690082  | similar to melanoma ubiquitous mutated protein                                                                | 0.551 | 0.003 | 0.291  | 0.033        | 0.210  | <b>0.811</b> |
| Ltb        | lymphotoxin beta (TNF superfamily, member 3)                                                                  | 0.549 | 0.003 | 0.513  | 0.003        | 0.696  | 0.001        |
| Osbp16     | oxysterol binding protein-like 6                                                                              | 0.549 | 0.004 | 0.276  | <b>0.750</b> | 0.125  | <b>0.820</b> |
| Fsip2      | fibrous sheath-interacting protein 2                                                                          | 0.547 | 0.006 | 0.319  | 0.030        | -0.064 | <b>0.579</b> |
| Vom1r98    | vomer nasal 1 receptor 98                                                                                     | 0.546 | 0.006 | 0.744  | 0.001        | 0.352  | 0.025        |
| Defa24     | defensin, alpha, 24                                                                                           | 0.545 | 0.008 | -0.523 | 0.010        | -0.528 | 0.004        |
| RGD1304563 | similar to RIKEN cDNA 4831426119                                                                              | 0.545 | 0.008 | 0.352  | 0.024        | 0.137  | <b>0.559</b> |
| Aqp5       | aquaporin 5                                                                                                   | 0.545 | 0.018 | 0.370  | <b>0.772</b> | -0.108 | <b>0.751</b> |
| Tle3       | transducin-like enhancer of split 3 (E(sp1) homolog, Drosophila)                                              | 0.545 | 0.005 | 0.312  | <b>0.973</b> | 0.241  | <b>0.915</b> |
| Pgap1      | post-GPI attachment to proteins 1                                                                             | 0.544 | 0.004 | 0.252  | <b>0.454</b> | 0.272  | <b>0.813</b> |
| Fam126b    | family with sequence similarity 126, member B                                                                 | 0.543 | 0.006 | 0.184  | <b>0.638</b> | 0.027  | <b>0.448</b> |
| Prrc2c     | proline-rich coiled-coil 2C                                                                                   | 0.542 | 0.004 | 0.316  | <b>0.899</b> | 0.295  | <b>0.052</b> |

|              |                                                                             |       |       |        |              |        |              |
|--------------|-----------------------------------------------------------------------------|-------|-------|--------|--------------|--------|--------------|
| Acvr2b       | activin A receptor, type IIB                                                | 0.541 | 0.004 | 0.275  | <b>0.903</b> | 0.108  | <b>0.713</b> |
| Acvr2b       | activin A receptor, type IIB                                                | 0.540 | 0.004 | 0.115  | <b>0.721</b> | 0.009  | <b>0.602</b> |
| LOC100365551 | hypothetical protein LOC100365551                                           | 0.539 | 0.009 | 0.075  | <b>0.690</b> | 0.057  | <b>0.515</b> |
| Gimap1       | GTPase, IMAP family member 1                                                | 0.536 | 0.001 | 0.276  | 0.014        | 0.489  | 0.002        |
| Ets2         | v-ets erythroblastosis virus E26 oncogene homolog 2 (avian)                 | 0.536 | 0.003 | 0.167  | <b>0.416</b> | 0.186  | <b>0.596</b> |
| Slc9a2       | solute carrier family 9 (sodium/hydrogen exchanger), member 2               | 0.536 | 0.004 | 0.163  | <b>0.532</b> | 0.018  | <b>0.339</b> |
| Fads2        | fatty acid desaturase 2                                                     | 0.536 | 0.006 | 0.386  | 0.020        | 0.140  | <b>0.856</b> |
| Aspg         | asparaginase homolog ( <i>S. cerevisiae</i> )                               | 0.536 | 0.021 | -0.099 | <b>0.441</b> | -0.234 | 0.016        |
| Piga         | phosphatidylinositol glycan anchor biosynthesis, class A                    | 0.535 | 0.006 | 0.221  | <b>0.703</b> | 0.072  | <b>0.739</b> |
| LOC501937    | similar to PRAME family member 8                                            | 0.535 | 0.008 | 0.421  | 0.015        | 0.447  | 0.008        |
| Prkacb       | protein kinase, cAMP dependent, catalytic, beta                             | 0.535 | 0.001 | 0.067  | 0.020        | 0.114  | 0.018        |
| LOC690120    | hypothetical protein LOC690120                                              | 0.534 | 0.002 | 0.058  | <b>0.446</b> | -0.031 | <b>0.170</b> |
| Tm4sf20      | transmembrane 4 L six family member 20                                      | 0.534 | 0.003 | 0.597  | 0.001        | 0.447  | 0.004        |
| Pkp1         | plakophilin 1                                                               | 0.534 | 0.005 | 0.264  | 0.037        | 0.225  | <b>0.068</b> |
| Cmya5        | cardiomyopathy associated 5                                                 | 0.533 | 0.006 | 0.556  | 0.005        | 0.216  | <b>0.681</b> |
| Irs2         | insulin receptor substrate 2                                                | 0.532 | 0.004 | 0.255  | <b>0.792</b> | 0.268  | <b>0.052</b> |
| Fmo4         | flavin containing monooxygenase 4                                           | 0.531 | 0.006 | 0.035  | <b>0.571</b> | -0.086 | <b>0.600</b> |
| RGD1309873   | similar to hypothetical protein BC010003                                    | 0.530 | 0.003 | 0.335  | 0.016        | 0.254  | 0.028        |
| RGD1560691   | similar to calcium/calmodulin-dependent protein kinase 1D                   | 0.530 | 0.002 | 0.245  | <b>0.668</b> | 0.129  | <b>0.658</b> |
| RGD1566265   | similar to RIKEN cDNA 2610002M06                                            | 0.529 | 0.031 | 0.411  | 0.010        | 0.217  | <b>0.790</b> |
| Slc22a3      | solute carrier family 22 (extraneuronal monoamine transporter), member 3    | 0.528 | 0.012 | 0.152  | <b>0.415</b> | 0.281  | <b>0.050</b> |
| RGD1563692   | similar to hypothetical protein FLJ22671                                    | 0.527 | 0.005 | 0.211  | <b>0.685</b> | 0.244  | <b>0.051</b> |
| Hnrnpa1      | heterogeneous nuclear ribonucleoprotein A1                                  | 0.526 | 0.007 | 0.358  | <b>0.954</b> | 0.391  | 0.022        |
| Bco2         | beta-carotene oxygenase 2                                                   | 0.526 | 0.013 | 0.303  | <b>0.922</b> | 0.122  | <b>0.693</b> |
| Trpm6        | transient receptor potential cation channel, subfamily M, member 6          | 0.526 | 0.005 | 0.367  | 0.029        | 0.138  | <b>0.503</b> |
| Atp2b1       | ATPase, Ca <sup>++</sup> transporting, plasma membrane 1                    | 0.525 | 0.005 | 0.321  | 0.024        | 0.052  | <b>0.670</b> |
| Slc12a6      | solute carrier family 12, member 6                                          | 0.524 | 0.005 | 0.039  | <b>0.452</b> | 0.050  | <b>0.432</b> |
| Anxa13       | annexin A13                                                                 | 0.524 | 0.001 | 0.352  | 0.007        | 0.507  | 0.003        |
| Bche         | butyrylcholinesterase                                                       | 0.523 | 0.008 | 0.197  | <b>0.739</b> | 0.231  | <b>0.904</b> |
| Pde6h        | phosphodiesterase 6H, cGMP-specific, cone, gamma                            | 0.523 | 0.003 | 0.611  | 0.004        | 0.743  | 0.003        |
| Lrg1         | leucine-rich alpha-2-glycoprotein 1                                         | 0.522 | 0.002 | 0.262  | <b>0.684</b> | 0.083  | <b>0.382</b> |
| Ocln         | occludin                                                                    | 0.521 | 0.006 | -0.028 | <b>0.621</b> | -0.019 | <b>0.594</b> |
| Slc4a7       | solute carrier family 4, sodium bicarbonate cotransporter, member 7         | 0.521 | 0.003 | 0.401  | 0.012        | 0.641  | 0.002        |
| Fabp6        | fatty acid binding protein 6, ileal                                         | 0.521 | 0.004 | -0.705 | 0.006        | -0.403 | 0.003        |
| Trim25       | tripartite motif-containing 25                                              | 0.520 | 0.004 | 0.195  | <b>0.847</b> | 0.219  | <b>0.933</b> |
| Slc7a13      | solute carrier family 7 (anionic amino acid transporter), member 13         | 0.519 | 0.004 | 0.422  | 0.010        | 0.250  | 0.048        |
| Acrbp        | acrosin binding protein                                                     | 0.519 | 0.009 | 0.287  | <b>0.893</b> | 0.188  | <b>0.772</b> |
| Fam189a2     | family with sequence similarity 189, member A2                              | 0.518 | 0.004 | -0.149 | <b>0.788</b> | -0.051 | <b>0.526</b> |
| Arrdc3       | arrestin domain containing 3                                                | 0.517 | 0.004 | 0.134  | <b>0.484</b> | 0.169  | <b>0.819</b> |
| Lta          | lymphotoxin alpha (TNF superfamily, member 1)                               | 0.517 | 0.015 | 0.154  | <b>0.073</b> | 0.310  | 0.030        |
| Wdr38        | WD repeat domain 38                                                         | 0.517 | 0.013 | 0.620  | 0.005        | 0.115  | <b>0.539</b> |
| Vcam1        | vascular cell adhesion molecule 1                                           | 0.517 | 0.007 | 0.084  | <b>0.132</b> | 0.141  | <b>0.192</b> |
| Grm4         | glutamate receptor, metabotropic 4                                          | 0.516 | 0.007 | 0.343  | <b>0.916</b> | 0.273  | <b>0.957</b> |
| Bmp7         | bone morphogenetic protein 7                                                | 0.513 | 0.008 | 0.061  | <b>0.783</b> | -0.180 | <b>0.956</b> |
| Chka         | choline kinase alpha                                                        | 0.513 | 0.007 | 0.270  | <b>0.821</b> | 0.342  | 0.037        |
| Ccl19        | chemokine (C-C motif) ligand 19                                             | 0.512 | 0.000 | 0.756  | 0.000        | 0.998  | 0.000        |
| Sprr1b       | small proline-rich protein 1B                                               | 0.512 | 0.004 | 0.363  | 0.014        | -0.119 | <b>0.445</b> |
| Ubd          | ubiquitin D                                                                 | 0.511 | 0.000 | 0.577  | 0.000        | 0.500  | 0.000        |
| LOC688155    | similar to Beta-1,4 N-acetylgalactosaminyltransferase 2                     | 0.511 | 0.023 | 0.661  | 0.002        | -0.042 | 0.009        |
| Spib         | Spi-B transcription factor (Spi-1/PU.1 related)                             | 0.510 | 0.001 | 0.687  | 0.000        | 0.577  | 0.002        |
| Clcn3        | chloride channel 3                                                          | 0.510 | 0.008 | 0.072  | <b>0.517</b> | -0.032 | <b>0.690</b> |
| Ovo1         | ovo-like 1( <i>Drosophila</i> )                                             | 0.510 | 0.008 | 0.193  | <b>0.933</b> | -0.027 | <b>0.601</b> |
| Wnt11        | wingless-type MMTV integration site family, member 11                       | 0.509 | 0.006 | -0.091 | <b>0.558</b> | -0.043 | <b>0.482</b> |
| RGD1562534   | similar to Insulin-like growth factor binding protein 4 precursor (IGFBP-4) | 0.507 | 0.032 | 0.492  | 0.045        | -0.267 | <b>0.936</b> |

|              |                                                                                     |       |       |        |              |        |              |
|--------------|-------------------------------------------------------------------------------------|-------|-------|--------|--------------|--------|--------------|
| Cyp27a1      | cytochrome P450, family 27, subfamily a, polypeptide 1                              | 0.507 | 0.007 | 0.068  | <b>0.789</b> | -0.081 | <b>0.678</b> |
| A2m          | alpha-2-macroglobulin                                                               | 0.506 | 0.004 | 0.458  | 0.006        | 0.376  | 0.033        |
| Prcc2c       | proline-rich coiled-coil 2C                                                         | 0.505 | 0.004 | 0.172  | <b>0.588</b> | 0.139  | <b>0.539</b> |
| Cyp26b1      | cytochrome P450, family 26, subfamily b, polypeptide 1                              | 0.504 | 0.010 | 0.582  | 0.005        | 0.488  | 0.004        |
| Gk           | glycerol kinase                                                                     | 0.503 | 0.011 | 0.129  | <b>0.800</b> | -0.035 | <b>0.514</b> |
| Ccl3         | chemokine (C-C motif) ligand 3                                                      | 0.502 | 0.008 | 1.193  | 0.000        | 0.805  | 0.000        |
| Slc45a3      | solute carrier family 45, member 3                                                  | 0.502 | 0.007 | 0.044  | <b>0.575</b> | -0.008 | <b>0.561</b> |
| LOC100365604 | neuroblastoma-amplified protein-like                                                | 0.502 | 0.007 | -0.018 | <b>0.604</b> | -0.123 | <b>0.852</b> |
| Slc11a2      | solute carrier family 11 (proton-coupled divalent metal ion transporters), member 2 | 0.502 | 0.008 | 0.326  | <b>0.990</b> | -0.087 | <b>0.820</b> |
| Olr1201      | olfactory receptor 1201                                                             | 0.502 | 0.049 | 0.341  | 0.035        | 0.146  | <b>0.814</b> |
| LOC678918    | similar to NADH dehydrogenase (ubiquinone) 1 beta subcomplex 3                      | 0.501 | 0.015 | 0.440  | 0.017        | -0.095 | <b>0.685</b> |
| LOC686260    | hypothetical protein LOC686260                                                      | 0.501 | 0.017 | 0.164  | <b>0.896</b> | 0.192  | <b>0.958</b> |
| RGD1559459   | similar to Expressed sequence AI788959                                              | 0.501 | 0.006 | 0.120  | <b>0.365</b> | 0.025  | <b>0.334</b> |
| Uts2d        | urotensin 2 domain containing                                                       | 0.501 | 0.011 | 0.032  | <b>0.724</b> | 0.117  | <b>0.674</b> |
| Clybl        | citrate lyase beta like                                                             | 0.500 | 0.002 | 0.545  | 0.001        | 0.457  | 0.002        |
| Slc5a3       | solute carrier family 5 (sodium/myo-inositol cotransporter), member 3               | 0.500 | 0.004 | 0.321  | 0.020        | 0.245  | 0.033        |
| B3galt2      | UDP-Gal:betaGlcNAc beta 1,3-galactosyltransferase, polypeptide 2                    | 0.500 | 0.005 | -0.201 | <b>0.789</b> | -0.027 | <b>0.399</b> |
| Rhoh         | ras homolog gene family, member H                                                   | 0.500 | 0.006 | 0.747  | 0.002        | 0.913  | 0.001        |
| Btnl2        | butyrophilin-like 2                                                                 | 0.499 | 0.008 | 0.135  | <b>0.652</b> | 0.036  | <b>0.671</b> |
| RGD1565690   | similar to mKIAA2027 protein                                                        | 0.499 | 0.009 | 0.111  | <b>0.747</b> | 0.012  | <b>0.395</b> |
| Slc5a11      | solute carrier family 5 (sodium/glucose cotransporter), member 11                   | 0.499 | 0.005 | 0.411  | 0.010        | 0.424  | 0.008        |
| Spa17        | sperm autoantigenic protein 17                                                      | 0.497 | 0.010 | -0.054 | <b>0.675</b> | -0.005 | <b>0.596</b> |
| Irgq         | immunity-related GTPase family, Q                                                   | 0.497 | 0.005 | 0.104  | <b>0.626</b> | -0.271 | 0.013        |
| Psd          | pleckstrin and Sec7 domain containing                                               | 0.495 | 0.012 | 0.052  | <b>0.724</b> | 0.120  | <b>0.810</b> |
| Tgif1        | TGFB-induced factor homeobox 1                                                      | 0.495 | 0.007 | 0.218  | <b>0.960</b> | 0.285  | <b>0.987</b> |
| Cd1d1        | CD1d1 molecule                                                                      | 0.495 | 0.005 | 0.108  | <b>0.481</b> | 0.030  | <b>0.433</b> |
| Lpar2        | lysophosphatidic acid receptor 2                                                    | 0.495 | 0.009 | 0.032  | <b>0.568</b> | 0.174  | <b>0.902</b> |
| B3galt2      | UDP-Gal:betaGlcNAc beta 1,3-galactosyltransferase, polypeptide 2                    | 0.495 | 0.007 | -0.212 | <b>0.785</b> | -0.076 | <b>0.366</b> |
| Slc2a13      | solute carrier family 2 (facilitated glucose transporter), member 13                | 0.495 | 0.004 | -0.137 | <b>0.739</b> | 0.014  | <b>0.569</b> |
| Per3         | period homolog 3 (Drosophila)                                                       | 0.495 | 0.007 | 0.281  | <b>0.957</b> | 0.057  | <b>0.693</b> |
| Med15        | mediator complex subunit 15                                                         | 0.494 | 0.010 | 0.224  | <b>0.875</b> | 0.251  | <b>0.940</b> |
| RGD1311575   | hypothetical LOC289568                                                              | 0.494 | 0.009 | 0.191  | <b>0.528</b> | 0.217  | <b>0.887</b> |
| Il21r        | interleukin 21 receptor                                                             | 0.494 | 0.003 | 0.536  | 0.005        | 0.888  | 0.000        |
| Rnf186       | ring finger protein 186                                                             | 0.493 | 0.008 | 0.201  | <b>0.845</b> | 0.005  | <b>0.516</b> |
| Olr1462      | olfactory receptor 1462                                                             | 0.493 | 0.008 | 0.910  | 0.000        | 0.462  | 0.003        |
| Ces2e        | carboxylesterase 2E                                                                 | 0.491 | 0.006 | 0.212  | <b>0.740</b> | -0.148 | <b>0.635</b> |
| LOC691670    | similar to natural killer cell protease 7                                           | 0.488 | 0.037 | 0.821  | 0.000        | 0.566  | 0.002        |
| Tinag        | tubulointerstitial nephritis antigen                                                | 0.488 | 0.010 | 0.122  | <b>0.805</b> | -0.115 | <b>0.714</b> |
| Ccdc48       | coiled-coil domain containing 48                                                    | 0.487 | 0.008 | 0.128  | <b>0.513</b> | 0.109  | <b>0.741</b> |
| C2           | complement component 2                                                              | 0.487 | 0.001 | 0.247  | 0.005        | -0.027 | <b>0.058</b> |
| Lpcat1       | lysophosphatidylcholine acyltransferase 1                                           | 0.486 | 0.005 | 0.037  | <b>0.517</b> | -0.204 | <b>0.827</b> |
| Traf3ip3     | TRAF3 interacting protein 3                                                         | 0.486 | 0.015 | 0.417  | 0.024        | 0.583  | 0.009        |
| Cyp2j3       | cytochrome P450, family 2, subfamily j, polypeptide 3                               | 0.486 | 0.008 | -0.025 | <b>0.506</b> | 0.060  | <b>0.661</b> |
| B3gnt5       | UDP-GlcNAc:betaGal beta-1,3-N-acetylglucosaminyltransferase 5                       | 0.485 | 0.001 | 0.230  | 0.011        | 0.172  | 0.021        |
| Gimap5       | GTPase, IMAP family member 5                                                        | 0.485 | 0.022 | 0.498  | 0.016        | 0.631  | 0.013        |
| Reln         | reelin                                                                              | 0.484 | 0.010 | 0.293  | <b>0.990</b> | 0.121  | <b>0.902</b> |
| Mocos        | molybdenum cofactor sulfurase                                                       | 0.484 | 0.008 | 0.098  | <b>0.708</b> | 0.007  | <b>0.643</b> |
| Ulk4         | unc-51-like kinase 4 (C. elegans)                                                   | 0.483 | 0.009 | 0.127  | <b>0.821</b> | 0.036  | <b>0.625</b> |
| RGD1562865   | similar to BTB and CNC homology 1, basic leucine zipper transcription factor 2      | 0.483 | 0.006 | 0.541  | 0.006        | 0.571  | 0.015        |
| Camsap2      | calmodulin regulated spectrin-associated protein family, member 2                   | 0.482 | 0.007 | 0.189  | <b>0.786</b> | 0.232  | <b>0.903</b> |
| Clu          | clusterin                                                                           | 0.482 | 0.001 | 0.325  | 0.004        | 0.449  | 0.005        |
| Sash3        | SAM and SH3 domain containing 3                                                     | 0.482 | 0.029 | 0.551  | 0.026        | 0.738  | 0.005        |
| Cyp3a9       | cytochrome P450, family 3, subfamily a, polypeptide 9                               | 0.481 | 0.010 | 0.167  | <b>0.636</b> | 0.149  | <b>0.820</b> |

|              |                                                                                                    |       |       |        |              |        |              |
|--------------|----------------------------------------------------------------------------------------------------|-------|-------|--------|--------------|--------|--------------|
| Lgr4         | leucine-rich repeat-containing G protein-coupled receptor 4                                        | 0.480 | 0.009 | 0.057  | <b>0.355</b> | 0.077  | <b>0.766</b> |
| Fgd4         | FYVE, RhoGEF and PH domain containing 4                                                            | 0.479 | 0.009 | 0.056  | <b>0.416</b> | 0.014  | <b>0.693</b> |
| RGD1565170   | similar to 60S ribosomal protein L23a                                                              | 0.479 | 0.008 | 0.168  | <b>0.777</b> | 0.125  | <b>0.653</b> |
| Olr1694      | olfactory receptor 1694                                                                            | 0.479 | 0.012 | 0.892  | 0.001        | 0.142  | <b>0.829</b> |
| Tnfrsf13c    | tumor necrosis factor receptor superfamily, member 13c                                             | 0.478 | 0.005 | 0.805  | 0.005        | 0.770  | 0.001        |
| Myog         | myogenin                                                                                           | 0.475 | 0.009 | 0.259  | <b>0.758</b> | 0.288  | 0.038        |
| Slc16a10     | solute carrier family 16 (monocarboxylic acid transporters), member 10                             | 0.475 | 0.009 | 0.139  | <b>0.908</b> | -0.014 | <b>0.604</b> |
| Hk1          | hexokinase 1                                                                                       | 0.475 | 0.010 | 0.316  | <b>0.925</b> | 0.187  | <b>0.766</b> |
| Nr1i3        | nuclear receptor subfamily 1, group I, member 3                                                    | 0.475 | 0.007 | 0.386  | 0.015        | 0.031  | <b>0.455</b> |
| RT1-Bb       | RT1 class II, locus Bb                                                                             | 0.475 | 0.000 | 0.512  | 0.000        | 0.737  | 0.000        |
| Serpina10    | serine (or cysteine) peptidase inhibitor, clade A (alpha-1 antiproteinase, antitrypsin), member 10 | 0.475 | 0.000 | -2.729 | 0.000        | -2.987 | 0.000        |
| C2           | complement component 2                                                                             | 0.475 | 0.003 | 0.334  | 0.007        | 0.134  | 0.033        |
| Grhl3        | grainyhead-like 3 (Drosophila)                                                                     | 0.474 | 0.004 | 0.110  | <b>0.518</b> | 0.453  | 0.006        |
| Sorcs1       | sortilin-related VPS10 domain containing receptor 1                                                | 0.474 | 0.016 | 0.325  | 0.026        | 0.344  | 0.044        |
| Hist2h2be    | histone cluster 2, H2be                                                                            | 0.473 | 0.009 | 0.136  | <b>0.554</b> | -0.147 | <b>0.629</b> |
| Gga2         | golgi associated, gamma adaptin ear containing, ARF binding protein 2                              | 0.472 | 0.041 | 0.506  | <b>0.583</b> | 0.618  | 0.013        |
| Sh2d1a       | SH2 domain containing 1A                                                                           | 0.472 | 0.038 | 0.360  | <b>0.104</b> | 0.760  | 0.008        |
| Kiaa0895l    | hypothetical protein LOC688736                                                                     | 0.472 | 0.006 | 0.355  | 0.015        | 0.097  | <b>0.706</b> |
| A2m          | alpha-2-macroglobulin                                                                              | 0.471 | 0.009 | 0.608  | 0.002        | 0.469  | 0.033        |
| RGD1310205   | similar to RIKEN cDNA 4921508O11                                                                   | 0.469 | 0.007 | 0.112  | <b>0.596</b> | 0.200  | <b>0.833</b> |
| Srsf11       | serine/arginine-rich splicing factor 11                                                            | 0.469 | 0.010 | 0.205  | <b>0.367</b> | 0.348  | 0.020        |
| Tmprss7      | transmembrane serine protease 7                                                                    | 0.469 | 0.010 | -0.333 | 0.029        | 0.045  | <b>0.346</b> |
| LOC686809    | similar to protein 7 transactivated by hepatitis B virus X antigen                                 | 0.469 | 0.009 | 0.248  | <b>0.869</b> | -0.287 | <b>0.973</b> |
| Ace2         | angiotensin I converting enzyme (peptidyl-dipeptidase A) 2                                         | 0.468 | 0.011 | 0.298  | <b>0.988</b> | 0.039  | <b>0.612</b> |
| Homer2       | homer homolog 2 (Drosophila)                                                                       | 0.468 | 0.005 | 0.005  | <b>0.211</b> | 0.290  | 0.030        |
| Fam81a       | family with sequence similarity 81, member A                                                       | 0.468 | 0.017 | 0.171  | <b>0.793</b> | 0.034  | <b>0.584</b> |
| RT1-T18      | RT1 class Ib, locus T18                                                                            | 0.468 | 0.021 | 0.712  | 0.006        | 0.036  | <b>0.557</b> |
| Fgd4         | FYVE, RhoGEF and PH domain containing 4                                                            | 0.467 | 0.008 | 0.091  | <b>0.670</b> | 0.120  | <b>0.742</b> |
| LOC686388    | similar to Prostatic steroid-binding protein C1 chain precursor (Prostatein peptide C1)            | 0.465 | 0.006 | 0.106  | <b>0.419</b> | 0.165  | <b>0.701</b> |
| Rab20        | RAB20, member RAS oncogene family                                                                  | 0.465 | 0.006 | 0.283  | 0.029        | 0.055  | <b>0.514</b> |
| Dpy19l4      | dpy-19-like 4 (C. elegans)                                                                         | 0.465 | 0.009 | 0.064  | <b>0.766</b> | 0.078  | <b>0.735</b> |
| Vwf          | von Willebrand factor                                                                              | 0.464 | 0.032 | 0.207  | <b>0.852</b> | 0.327  | 0.037        |
| Dnaja4       | DnaJ (Hsp40) homolog, subfamily A, member 4                                                        | 0.463 | 0.009 | 0.220  | <b>0.968</b> | 0.339  | 0.027        |
| RGD1566399   | similar to MYST histone acetyltransferase monocytic leukemia 4                                     | 0.463 | 0.010 | 0.304  | <b>0.883</b> | 0.214  | <b>0.943</b> |
| Bmp2k        | BMP-2 inducible kinase                                                                             | 0.462 | 0.009 | -0.001 | <b>0.350</b> | 0.359  | 0.020        |
| LOC501437    | similar to MIC2 like 1                                                                             | 0.461 | 0.009 | 0.008  | <b>0.469</b> | 0.202  | <b>0.051</b> |
| Ahnak        | AHNAK nucleoprotein                                                                                | 0.460 | 0.005 | 0.148  | <b>0.523</b> | 0.031  | <b>0.390</b> |
| Bcl6         | B-cell CLL/lymphoma 6                                                                              | 0.460 | 0.017 | 0.285  | <b>0.053</b> | 0.466  | <b>0.050</b> |
| LOC100192205 | heat shock factor binding protein 1-like                                                           | 0.460 | 0.018 | -0.137 | <b>0.673</b> | -0.152 | <b>0.884</b> |
| Siae         | sialic acid acetyltransferase                                                                      | 0.459 | 0.012 | 0.027  | <b>0.656</b> | -0.095 | <b>0.781</b> |
| RGD1560815   | similar to acidic ribosomal phosphoprotein P1                                                      | 0.459 | 0.011 | 0.156  | <b>0.870</b> | 0.046  | <b>0.759</b> |
| Dll1         | delta-like 1 (Drosophila)                                                                          | 0.459 | 0.012 | 0.070  | <b>0.508</b> | -0.127 | <b>0.826</b> |
| Kcnj1        | potassium inwardly-rectifying channel, subfamily J, member 1                                       | 0.457 | 0.013 | 0.836  | 0.000        | 0.491  | 0.009        |
| Stat4        | signal transducer and activator of transcription 4                                                 | 0.457 | 0.033 | 0.404  | 0.021        | 0.397  | 0.038        |
| Plekhh1      | pleckstrin homology domain containing, family H (with MyTH4 domain) member 1                       | 0.456 | 0.008 | 0.662  | 0.000        | -0.199 | 0.015        |
| Creb1        | cAMP responsive element binding protein 1                                                          | 0.455 | 0.013 | 0.348  | <b>0.984</b> | 0.348  | 0.039        |
| Nlrp5        | NLR family, pyrin domain containing 5                                                              | 0.454 | 0.012 | 0.077  | <b>0.503</b> | 0.116  | <b>0.665</b> |
| St3gal2      | ST3 beta-galactoside alpha-2,3-sialyltransferase 2                                                 | 0.454 | 0.021 | 0.253  | <b>0.808</b> | -0.026 | <b>0.470</b> |
| Hgf          | hepatocyte growth factor                                                                           | 0.453 | 0.005 | 0.466  | 0.005        | 0.259  | 0.029        |
| Cited2       | Cbp/p300-interacting transactivator, with Glu/Asp-rich carboxy-terminal domain, 2                  | 0.452 | 0.012 | 0.094  | <b>0.644</b> | 0.143  | <b>0.802</b> |
| Cpne8        | copine VIII                                                                                        | 0.452 | 0.016 | 0.093  | <b>0.749</b> | 0.101  | <b>0.847</b> |
| Rnf145       | ring finger protein 145                                                                            | 0.452 | 0.013 | 0.049  | <b>0.610</b> | -0.026 | <b>0.506</b> |
| Lax1         | lymphocyte transmembrane adaptor 1                                                                 | 0.452 | 0.010 | 0.508  | 0.011        | 0.562  | 0.006        |
| Map3k1       | mitogen activated protein kinase kinase kinase 1                                                   | 0.451 | 0.013 | 0.190  | <b>0.532</b> | 0.282  | <b>0.055</b> |



|            |                                                                                                               |       |       |        |              |        |              |
|------------|---------------------------------------------------------------------------------------------------------------|-------|-------|--------|--------------|--------|--------------|
| Ms4a1      | membrane-spanning 4-domains, subfamily A, member                                                              | 0.451 | 0.009 | 0.391  | 0.029        | 0.615  | 0.002        |
| Minpp1     | multiple inositol-polyphosphate phosphatase 1                                                                 | 0.450 | 0.010 | 0.372  | 0.019        | 0.027  | <b>0.442</b> |
| Nr2f2      | nuclear receptor subfamily 2, group F, member 2                                                               | 0.450 | 0.007 | 0.299  | <b>0.836</b> | 0.130  | <b>0.704</b> |
| Tmem194b   | transmembrane protein 194B                                                                                    | 0.450 | 0.015 | 0.462  | 0.009        | 0.380  | 0.039        |
| Rgl3       | ral guanine nucleotide dissociation stimulator-like 3                                                         | 0.450 | 0.011 | 0.529  | 0.006        | 0.172  | <b>0.873</b> |
| Agpat4     | 1-acylglycerol-3-phosphate O-acyltransferase 4 (lysophosphatidic acid acyltransferase, delta)                 | 0.450 | 0.012 | 0.152  | <b>0.743</b> | 0.165  | <b>0.899</b> |
| RT1-EC2    | RT1 class Ib, locus EC2                                                                                       | 0.450 | 0.017 | 0.300  | 0.025        | 0.362  | 0.016        |
| Klhl24     | kelch-like 24 (Drosophila)                                                                                    | 0.449 | 0.010 | 0.336  | <b>0.984</b> | 0.487  | 0.004        |
| Angpt2     | angiopoietin 2                                                                                                | 0.449 | 0.009 | 0.192  | <b>0.900</b> | 0.105  | <b>0.594</b> |
| Sh3d19     | SH3 domain containing 19                                                                                      | 0.449 | 0.007 | 0.083  | <b>0.477</b> | 0.064  | <b>0.462</b> |
| Nr5a2      | nuclear receptor subfamily 5, group A, member 2                                                               | 0.448 | 0.010 | 0.029  | <b>0.579</b> | 0.065  | <b>0.611</b> |
| Hexim1     | hexamethylene bis-acetamide inducible 1                                                                       | 0.447 | 0.011 | 0.176  | <b>0.904</b> | 0.109  | <b>0.780</b> |
| LOC681325  | hypothetical protein LOC681325                                                                                | 0.447 | 0.029 | 0.421  | <b>0.065</b> | 0.551  | 0.028        |
| Itpkc      | inositol-trisphosphate 3-kinase C                                                                             | 0.447 | 0.013 | 0.207  | <b>0.931</b> | 0.107  | <b>0.854</b> |
| Clcn1      | chloride channel 1                                                                                            | 0.446 | 0.015 | 0.090  | <b>0.688</b> | 0.023  | <b>0.650</b> |
| Ppcdc      | phosphopantothienoylcysteine decarboxylase                                                                    | 0.446 | 0.025 | 0.362  | <b>0.985</b> | 0.159  | <b>0.918</b> |
| Adam15     | a disintegrin and metalloproteinase domain 15 (metargidin)                                                    | 0.446 | 0.015 | 0.036  | <b>0.541</b> | 0.008  | <b>0.588</b> |
| Ctnna1     | catenin (cadherin associated protein), alpha-like 1                                                           | 0.446 | 0.012 | 0.101  | <b>0.776</b> | 0.192  | <b>0.927</b> |
| Asb15      | ankyrin repeat and SOCS box-containing protein 15                                                             | 0.445 | 0.047 | 0.123  | <b>0.864</b> | 0.060  | <b>0.797</b> |
| Iqgap1     | IQ motif containing GTPase activating protein 1                                                               | 0.445 | 0.002 | 0.106  | 0.042        | 0.108  | 0.033        |
| Cdyl       | chromodomain protein, Y-like                                                                                  | 0.444 | 0.014 | 0.197  | <b>0.951</b> | 0.097  | <b>0.822</b> |
| Fam129b    | family with sequence similarity 129, member B                                                                 | 0.444 | 0.014 | 0.051  | <b>0.613</b> | -0.077 | <b>0.596</b> |
| Ccl9       | chemokine (C-C motif) ligand 9                                                                                | 0.444 | 0.020 | 0.162  | 0.027        | 0.106  | 0.035        |
| Ntsr2      | neurotensin receptor 2                                                                                        | 0.444 | 0.034 | -0.032 | <b>0.643</b> | -0.024 | <b>0.544</b> |
| RGD1562136 | similar to D1Ert622e protein                                                                                  | 0.444 | 0.012 | -0.005 | <b>0.492</b> | 0.072  | <b>0.743</b> |
| LOC691813  | similar to phospholipase A2, group IVC (cytosolic, calcium-independent)                                       | 0.444 | 0.010 | 0.481  | 0.004        | 0.949  | 0.001        |
| Sag        | S-antigen; retina and pineal gland (arrestin)                                                                 | 0.443 | 0.033 | 0.379  | <b>0.062</b> | 0.384  | 0.028        |
| Kctd11     | potassium channel tetramerisation domain containing 11                                                        | 0.442 | 0.012 | 0.136  | <b>0.833</b> | 0.216  | <b>0.959</b> |
| Napepld    | N-acyl phosphatidylethanolamine phospholipase D                                                               | 0.442 | 0.012 | 0.030  | <b>0.394</b> | -0.072 | <b>0.391</b> |
| Sgk2       | serum/glucocorticoid regulated kinase 2                                                                       | 0.442 | 0.002 | -0.326 | 0.008        | -0.029 | 0.031        |
| Prdx5      | peroxiredoxin 5                                                                                               | 0.441 | 0.021 | 0.273  | <b>0.972</b> | 0.075  | <b>0.745</b> |
| Snn        | stannin                                                                                                       | 0.441 | 0.005 | 0.445  | 0.010        | 0.408  | 0.030        |
| Tp53inp1   | tumor protein p53 inducible nuclear protein 1                                                                 | 0.441 | 0.014 | 0.224  | <b>0.920</b> | 0.314  | 0.045        |
| Tcp11      | t-complex protein 11                                                                                          | 0.440 | 0.011 | 0.443  | 0.015        | -0.102 | <b>0.360</b> |
| RT1-CE2    | RT1 class I, locus CE2                                                                                        | 0.440 | 0.013 | 0.400  | 0.011        | 0.407  | 0.011        |
| Cytip      | cytohesin 1 interacting protein                                                                               | 0.439 | 0.006 | 0.625  | 0.012        | 0.862  | 0.001        |
| Gpr137b    | G protein-coupled receptor 137B                                                                               | 0.439 | 0.019 | -0.010 | <b>0.476</b> | 0.097  | <b>0.661</b> |
| Nr3c2      | nuclear receptor subfamily 3, group C, member 2                                                               | 0.439 | 0.014 | 0.069  | <b>0.533</b> | 0.089  | <b>0.780</b> |
| LOC681820  | hypothetical protein LOC681820                                                                                | 0.439 | 0.017 | 0.172  | <b>0.767</b> | -0.153 | <b>0.866</b> |
| Itga6      | integrin, alpha 6                                                                                             | 0.439 | 0.012 | -0.037 | <b>0.336</b> | 0.051  | <b>0.407</b> |
| St6galnac1 | ST6 (alpha-N-acetyl-neuraminyl-2,3-beta-galactosyl-1,3)-N-acetylgalactosaminide alpha-2,6-sialyltransferase 1 | 0.439 | 0.013 | 0.227  | <b>0.938</b> | 0.221  | <b>0.794</b> |
| Ubxn7      | UBX domain protein 7                                                                                          | 0.439 | 0.016 | 0.288  | <b>0.909</b> | 0.401  | 0.020        |
| Tns4       | tensin 4                                                                                                      | 0.439 | 0.012 | 0.218  | <b>0.907</b> | 0.091  | <b>0.497</b> |
| RGD1559532 | RGD1559532                                                                                                    | 0.438 | 0.017 | 0.108  | <b>0.738</b> | 0.092  | <b>0.645</b> |
| LOC684327  | similar to inter-alpha (globulin) inhibitor H5                                                                | 0.438 | 0.013 | 0.356  | 0.026        | 0.279  | 0.046        |
| Itgb8      | integrin, beta 8                                                                                              | 0.438 | 0.012 | 0.116  | <b>0.574</b> | 0.105  | <b>0.732</b> |
| Apln       | apelin                                                                                                        | 0.437 | 0.021 | -0.315 | 0.036        | -0.708 | 0.000        |
| Sh2b2      | SH2B adaptor protein 2                                                                                        | 0.437 | 0.015 | 0.656  | 0.006        | 0.604  | 0.007        |
| Chst1      | carbohydrate (keratan sulfate Gal-6) sulfotransferase 1                                                       | 0.436 | 0.004 | 0.527  | 0.005        | 0.431  | 0.004        |
| Tax1bp1    | Tax1 (human T-cell leukemia virus type I) binding protein 1                                                   | 0.436 | 0.015 | 0.389  | 0.022        | 0.406  | 0.016        |
| LOC687346  | similar to BRCA1-associated protein (BRAP2) (Impedes mitogenic signal propagation) (IMP)                      | 0.436 | 0.013 | 0.204  | <b>0.778</b> | -0.046 | <b>0.620</b> |
| RT1-CE4    | RT1 class I, locus CE4                                                                                        | 0.436 | 0.027 | 0.367  | 0.026        | 0.334  | 0.034        |
| Nr5a2      | nuclear receptor subfamily 5, group A, member 2                                                               | 0.436 | 0.012 | -0.047 | <b>0.657</b> | 0.036  | <b>0.560</b> |
| Pou2f1     | POU class 2 homeobox 1                                                                                        | 0.436 | 0.014 | 0.284  | <b>0.922</b> | 0.239  | <b>0.674</b> |
| Sall2      | sal-like 2 (Drosophila)                                                                                       | 0.435 | 0.017 | 0.154  | <b>0.840</b> | 0.018  | <b>0.719</b> |
| Phldb3     | pleckstrin homology-like domain, family B, member 3                                                           | 0.434 | 0.018 | -0.069 | <b>0.719</b> | 0.007  | <b>0.526</b> |

|            |                                                                         |       |       |        |              |        |              |
|------------|-------------------------------------------------------------------------|-------|-------|--------|--------------|--------|--------------|
| Rhbg       | Rh family, B glycoprotein                                               | 0.434 | 0.026 | -0.005 | <b>0.709</b> | -0.016 | <b>0.667</b> |
| Neurod1    | neurogenic differentiation 1                                            | 0.433 | 0.012 | 0.170  | <b>0.808</b> | 0.182  | <b>0.873</b> |
| Exoc3l4    | exocyst complex component 3-like 4                                      | 0.433 | 0.014 | 0.455  | 0.010        | 0.351  | 0.036        |
| Gda        | guanine deaminase                                                       | 0.433 | 0.016 | 0.073  | <b>0.418</b> | 0.100  | <b>0.490</b> |
| C1ql3      | complement component 1, q subcomponent-like 3                           | 0.433 | 0.006 | 0.467  | 0.009        | 0.324  | <b>0.054</b> |
| Ccbl1      | cysteine conjugate-beta lyase, cytoplasmic                              | 0.433 | 0.018 | 0.270  | <b>0.963</b> | 0.186  | <b>0.822</b> |
| Rnf186     | ring finger protein 186                                                 | 0.432 | 0.015 | 0.149  | <b>0.774</b> | 0.015  | <b>0.585</b> |
| RGD1305704 | similar to c-Mpl binding protein                                        | 0.431 | 0.033 | -0.009 | <b>0.470</b> | 0.063  | <b>0.645</b> |
| Lypd3      | Ly6/Plaur domain containing 3                                           | 0.430 | 0.019 | -0.048 | <b>0.758</b> | -0.073 | <b>0.808</b> |
| Dnajc5b    | DnaJ (Hsp40) homolog, subfamily C, member 5 beta                        | 0.430 | 0.046 | 0.227  | <b>0.691</b> | -0.099 | <b>0.763</b> |
| RT1-CE7    | RT1 class I, locus CE7                                                  | 0.429 | 0.012 | 0.162  | <b>0.428</b> | 0.067  | <b>0.589</b> |
| Padi4      | peptidyl arginine deiminase, type IV                                    | 0.428 | 0.020 | 0.295  | <b>0.599</b> | -0.050 | <b>0.470</b> |
| Phgdh      | phosphoglycerate dehydrogenase                                          | 0.427 | 0.019 | 0.394  | 0.025        | 0.130  | <b>0.685</b> |
| Sun2       | Sad1 and UNC84 domain containing 2                                      | 0.427 | 0.016 | 0.436  | 0.011        | 0.429  | 0.010        |
| Slc12a6    | solute carrier family 12, member 6                                      | 0.427 | 0.013 | 0.168  | <b>0.777</b> | 0.126  | <b>0.723</b> |
| RT1-A1     | RT1 class Ia, locus A1                                                  | 0.427 | 0.014 | 0.225  | 0.042        | 0.232  | <b>0.902</b> |
| RGD1305899 | similar to Protein C20orf158                                            | 0.427 | 0.018 | -0.073 | <b>0.685</b> | -0.234 | <b>0.894</b> |
| Per3       | period homolog 3 (Drosophila)                                           | 0.426 | 0.019 | 0.208  | <b>0.958</b> | 0.110  | <b>0.874</b> |
| Irs1       | insulin receptor substrate 1                                            | 0.426 | 0.020 | 0.194  | <b>0.928</b> | -0.042 | <b>0.701</b> |
| Plip       | plasmolipin                                                             | 0.426 | 0.019 | 0.033  | <b>0.735</b> | -0.057 | <b>0.675</b> |
| Slc5a4a    | solute carrier family 5 (low affinity glucose cotransporter), member 4a | 0.426 | 0.011 | 0.073  | <b>0.415</b> | 0.243  | 0.033        |
| Ankrd42    | ankyrin repeat domain 42                                                | 0.425 | 0.020 | 0.033  | <b>0.705</b> | 0.007  | <b>0.616</b> |
| Cyp2c6v1   | cytochrome P450, family 2, subfamily C, polypeptide 6, variant 1        | 0.425 | 0.014 | 0.296  | <b>0.794</b> | 0.136  | <b>0.751</b> |
| Myo1a      | myosin IA                                                               | 0.425 | 0.019 | 0.003  | <b>0.635</b> | -0.047 | <b>0.627</b> |
| Stfa2l1    | stefin A2-like 1                                                        | 0.424 | 0.024 | 0.457  | 0.021        | -0.107 | <b>0.654</b> |
| S1pr4      | sphingosine-1-phosphate receptor 4                                      | 0.424 | 0.011 | 0.299  | 0.046        | 0.383  | 0.017        |
| Pde9a      | phosphodiesterase 9A                                                    | 0.424 | 0.019 | 0.341  | 0.029        | 0.249  | <b>0.921</b> |
| LOC680097  | similar to germinal histone H4 gene                                     | 0.424 | 0.019 | -0.209 | <b>0.878</b> | -0.101 | <b>0.652</b> |
| Cyp11b3    | cytochrome P450, family 11, subfamily b, polypeptide 3                  | 0.423 | 0.027 | 0.713  | 0.005        | 0.173  | <b>0.878</b> |
| Ggh        | gamma-glutamyl hydrolase (conjugase, foylypolyglutamyglutamy hydrolase) | 0.423 | 0.019 | 0.048  | <b>0.686</b> | 0.180  | <b>0.858</b> |
| Med17      | mediator complex subunit 17                                             | 0.423 | 0.009 | 0.227  | 0.038        | 0.125  | <b>0.084</b> |
| Rmnd5a     | required for meiotic nuclear division 5 homolog A (S. cerevisiae)       | 0.423 | 0.009 | -0.139 | <b>0.443</b> | 0.096  | <b>0.503</b> |
| Gpank1     | G patch domain and ankyrin repeats 1                                    | 0.423 | 0.019 | 0.368  | 0.023        | 0.306  | 0.047        |
| RGD1563562 | similar to GTPase activating protein testicular GAP1                    | 0.423 | 0.022 | 0.187  | <b>0.592</b> | 0.123  | <b>0.579</b> |
| Ubx2b      | UBX domain protein 2B                                                   | 0.423 | 0.034 | 0.111  | <b>0.754</b> | -0.170 | <b>0.945</b> |
| LOC683463  | similar to paired-Ig-like receptor B                                    | 0.422 | 0.036 | 0.028  | <b>0.584</b> | 0.554  | 0.016        |
| Wnt11      | wingless-type MMTV integration site family, member 11                   | 0.422 | 0.012 | 0.012  | <b>0.450</b> | 0.047  | <b>0.487</b> |
| RGD1565164 | similar to associated molecule with the SH3 domain of STAM              | 0.422 | 0.027 | -0.016 | <b>0.681</b> | 0.018  | <b>0.646</b> |
| Kitlg      | KIT ligand                                                              | 0.421 | 0.019 | 0.043  | <b>0.692</b> | 0.001  | <b>0.569</b> |
| Igsf3      | immunoglobulin superfamily, member 3                                    | 0.421 | 0.017 | 0.157  | <b>0.797</b> | 0.035  | <b>0.723</b> |
| RGD1305679 | similar to 9530008L14Rik protein                                        | 0.421 | 0.019 | 0.041  | <b>0.706</b> | 0.289  | <b>0.053</b> |
| Casr       | calcium-sensing receptor                                                | 0.420 | 0.017 | 0.246  | <b>0.875</b> | 0.106  | <b>0.656</b> |
| Tm4sf20    | transmembrane 4 L six family member 20                                  | 0.420 | 0.006 | 0.359  | 0.007        | 0.143  | <b>0.051</b> |
| Vom1r22    | vomeroneural 1 receptor 22                                              | 0.420 | 0.027 | 0.154  | <b>0.711</b> | 0.254  | <b>0.958</b> |
| Trim36     | tripartite motif-containing 36                                          | 0.418 | 0.018 | 0.195  | <b>0.657</b> | 0.098  | <b>0.830</b> |
| Aldh11l1   | aldehyde dehydrogenase 1 family, member L1                              | 0.417 | 0.019 | 0.185  | <b>0.810</b> | 0.015  | <b>0.601</b> |
| Tcp11l2    | t-complex 11 (mouse) like 2                                             | 0.417 | 0.014 | 0.210  | <b>0.887</b> | 0.323  | 0.029        |
| Ahnak      | AHNAK nucleoprotein                                                     | 0.417 | 0.023 | 0.219  | <b>0.465</b> | 0.019  | <b>0.448</b> |
| Casc5      | cancer susceptibility candidate 5                                       | 0.417 | 0.018 | -0.086 | <b>0.611</b> | -0.038 | <b>0.448</b> |
| Clcn5      | chloride channel 5                                                      | 0.416 | 0.023 | 0.080  | <b>0.368</b> | 0.180  | <b>0.843</b> |
| RT1-Db1    | RT1 class II, locus Db1                                                 | 0.416 | 0.007 | 0.479  | 0.001        | 0.682  | 0.000        |
| Arap2      | ArfGAP with RhoGAP domain, ankyrin repeat and PH domain 2               | 0.416 | 0.019 | 0.274  | <b>0.919</b> | 0.418  | 0.010        |
| Mtfr1      | mitochondrial fission regulator 1                                       | 0.414 | 0.035 | 0.055  | <b>0.642</b> | -0.133 | <b>0.818</b> |
| Nr1h4      | nuclear receptor subfamily 1, group H, member 4                         | 0.414 | 0.019 | 0.086  | <b>0.530</b> | -0.067 | <b>0.719</b> |
| Klf9       | Kruppel-like factor 9                                                   | 0.414 | 0.018 | 0.364  | 0.026        | 0.282  | <b>0.053</b> |
| Rhov       | ras homolog gene family, member V                                       | 0.414 | 0.011 | -0.394 | 0.007        | -0.177 | <b>0.594</b> |
| Spint1     | serine peptidase inhibitor, Kunitz type 1                               | 0.414 | 0.019 | 0.037  | <b>0.484</b> | 0.178  | <b>0.951</b> |
| Gimap7     | GTPase, IMAP family member 7                                            | 0.413 | 0.027 | 0.418  | 0.018        | 0.815  | 0.002        |

|            |                                                                                  |       |       |        |              |        |              |
|------------|----------------------------------------------------------------------------------|-------|-------|--------|--------------|--------|--------------|
| Il1r1      | interleukin 1 receptor-like 1                                                    | 0.413 | 0.013 | 0.339  | 0.016        | 0.378  | 0.011        |
| Arhgap39   | Rho GTPase activating protein 39                                                 | 0.413 | 0.023 | 0.243  | <b>0.948</b> | 0.266  | <b>0.983</b> |
| Clec14a    | C-type lectin domain family 14, member A                                         | 0.413 | 0.020 | 0.269  | <b>0.943</b> | 0.073  | <b>0.689</b> |
| Cbp        | Csk binding protein                                                              | 0.413 | 0.017 | 0.071  | <b>0.685</b> | 0.188  | <b>0.873</b> |
| Ptprr      | protein tyrosine phosphatase, receptor type, R                                   | 0.412 | 0.023 | 0.065  | <b>0.561</b> | -0.264 | <b>0.912</b> |
| Bmp2       | bone morphogenetic protein 2                                                     | 0.412 | 0.021 | 0.213  | <b>0.908</b> | 0.133  | <b>0.876</b> |
| Slc5a1     | solute carrier family 5 (sodium/glucose cotransporter), member 1                 | 0.412 | 0.017 | 0.206  | <b>0.835</b> | 0.013  | <b>0.607</b> |
| Aqp7       | aquaporin 7                                                                      | 0.411 | 0.017 | 0.133  | <b>0.104</b> | 0.176  | <b>0.065</b> |
| Cs         | citrate synthase                                                                 | 0.411 | 0.020 | 0.278  | <b>0.962</b> | 0.180  | <b>0.929</b> |
| Ahdc1      | AT hook, DNA binding motif, containing 1                                         | 0.410 | 0.024 | 0.201  | <b>0.720</b> | 0.252  | <b>0.795</b> |
| Prelp      | proline/arginine-rich end leucine-rich repeat protein                            | 0.410 | 0.019 | 0.205  | <b>0.876</b> | -0.002 | <b>0.514</b> |
| Il1r2      | interleukin 1 receptor, type II                                                  | 0.410 | 0.019 | 0.486  | 0.006        | 0.353  | 0.044        |
| Hook3      | hook homolog 3 (Drosophila)                                                      | 0.410 | 0.018 | 0.282  | 0.036        | 0.226  | 0.043        |
| Zfp608     | zinc finger protein 608                                                          | 0.410 | 0.020 | 0.081  | <b>0.831</b> | 0.222  | <b>0.968</b> |
| Htra4      | HtrA serine peptidase 4                                                          | 0.410 | 0.035 | 0.172  | <b>0.668</b> | -0.068 | <b>0.657</b> |
| Siae       | sialic acid acetyltransferase                                                    | 0.410 | 0.021 | 0.067  | <b>0.694</b> | -0.019 | <b>0.563</b> |
| RGD1561115 | similar to Gene model 1568                                                       | 0.409 | 0.026 | 0.182  | <b>0.428</b> | 0.008  | <b>0.374</b> |
| Rreb1      | ras responsive element binding protein 1                                         | 0.409 | 0.017 | -0.095 | <b>0.464</b> | -0.073 | <b>0.466</b> |
| Ugt2b34    | UDP glucuronosyltransferase 2 family, polypeptide B34                            | 0.409 | 0.017 | 0.101  | <b>0.468</b> | 0.093  | <b>0.419</b> |
| Klf10      | Kruppel-like factor 10                                                           | 0.409 | 0.015 | 0.113  | <b>0.656</b> | 0.020  | <b>0.408</b> |
| Tnrc6b     | trinucleotide repeat containing 6B                                               | 0.408 | 0.024 | 0.194  | <b>0.807</b> | 0.114  | <b>0.850</b> |
| Sit1       | signaling threshold regulating transmembrane adaptor 1                           | 0.408 | 0.003 | 0.533  | 0.002        | 0.658  | 0.001        |
| Cad        | carbamoyl-phosphate synthetase 2, aspartate transcarbamylase, and dihydroorotase | 0.408 | 0.021 | 0.330  | <b>0.898</b> | 0.119  | <b>0.643</b> |
| Sema6c     | sema domain, transmembrane domain (TM), and cytoplasmic domain, (semaphorin) 6C  | 0.408 | 0.017 | 0.081  | <b>0.763</b> | 0.141  | <b>0.746</b> |
| Snx25      | sorting nexin 25                                                                 | 0.408 | 0.019 | 0.133  | <b>0.791</b> | 0.153  | <b>0.798</b> |
| Aph1b      | anterior pharynx defective 1 homolog B (C. elegans)                              | 0.408 | 0.022 | 0.218  | <b>0.969</b> | 0.080  | <b>0.760</b> |
| Enpp4      | ectonucleotide pyrophosphatase/phosphodiesterase 4                               | 0.408 | 0.012 | 0.028  | <b>0.232</b> | 0.075  | <b>0.527</b> |
| Zfp133     | zinc finger protein 133                                                          | 0.408 | 0.024 | 0.033  | <b>0.625</b> | 0.002  | <b>0.507</b> |
| Met        | met proto-oncogene                                                               | 0.407 | 0.019 | -0.092 | <b>0.763</b> | -0.014 | <b>0.587</b> |
| Sesn1      | sestrin 1                                                                        | 0.407 | 0.022 | 0.220  | <b>0.932</b> | 0.453  | 0.007        |
| Gan        | gigaxonin                                                                        | 0.407 | 0.028 | 0.152  | <b>0.727</b> | -0.008 | <b>0.490</b> |
| Phf3       | PHD finger protein 3                                                             | 0.406 | 0.023 | 0.189  | <b>0.947</b> | 0.099  | <b>0.893</b> |
| Gtlf3b     | gene trap locus F3b                                                              | 0.405 | 0.015 | 0.265  | <b>0.907</b> | 0.280  | 0.048        |
| RGD1562351 | similar to chromosome 7 open reading frame 23                                    | 0.405 | 0.033 | 0.116  | <b>0.145</b> | 0.375  | 0.044        |
| Cobl       | cordón-bleu homolog (mouse)                                                      | 0.405 | 0.016 | -0.043 | <b>0.631</b> | -0.032 | <b>0.508</b> |
| Pdcd6ip    | programmed cell death 6 interacting protein                                      | 0.405 | 0.013 | 0.082  | <b>0.546</b> | 0.303  | 0.026        |
| S100vp     | S100 calcium-binding protein, ventral prostate                                   | 0.405 | 0.024 | 0.102  | <b>0.810</b> | 0.102  | <b>0.543</b> |
| Bahd1      | bromo adjacent homology domain containing 1                                      | 0.404 | 0.025 | 0.027  | <b>0.678</b> | -0.016 | <b>0.597</b> |
| Sptssa     | serine palmitoyltransferase, small subunit A                                     | 0.404 | 0.030 | 0.055  | <b>0.731</b> | -0.183 | <b>0.948</b> |
| Olr791     | olfactory receptor 791                                                           | 0.404 | 0.031 | 0.069  | <b>0.790</b> | -0.017 | <b>0.613</b> |
| Gclc       | glutamate-cysteine ligase, catalytic subunit                                     | 0.403 | 0.017 | 0.116  | <b>0.657</b> | -0.007 | <b>0.365</b> |
| Gtf3c4     | general transcription factor IIIC, polypeptide 4                                 | 0.403 | 0.028 | 0.214  | <b>0.604</b> | -0.023 | <b>0.675</b> |
| Ehbp1      | EH domain binding protein 1                                                      | 0.403 | 0.021 | 0.194  | <b>0.853</b> | 0.290  | <b>0.954</b> |
| Wasl       | Wiskott-Aldrich syndrome-like                                                    | 0.403 | 0.019 | 0.196  | <b>0.901</b> | 0.294  | 0.045        |
| Trim16     | tripartite motif-containing 16                                                   | 0.402 | 0.021 | -0.043 | <b>0.535</b> | 0.004  | <b>0.543</b> |
| Ddit4l     | DNA-damage-inducible transcript 4-like                                           | 0.402 | 0.012 | 0.147  | <b>0.335</b> | 0.311  | 0.031        |
| Espnl      | espin-like                                                                       | 0.402 | 0.029 | 0.251  | <b>0.834</b> | 0.006  | <b>0.712</b> |
| Gpsm2      | G-protein signaling modulator 2                                                  | 0.402 | 0.023 | -0.010 | <b>0.610</b> | -0.144 | <b>0.889</b> |
| Hist1h1a   | histone cluster 1, H1a                                                           | 0.402 | 0.009 | 0.118  | <b>0.667</b> | 0.011  | <b>0.437</b> |
| Adrb2      | adrenergic, beta-2-, receptor, surface                                           | 0.401 | 0.035 | 0.165  | <b>0.695</b> | 0.153  | <b>0.342</b> |
| RGD1561149 | similar to mKIAA1522 protein                                                     | 0.401 | 0.023 | 0.073  | <b>0.682</b> | -0.049 | <b>0.644</b> |
| Marcks     | myristoylated alanine rich protein kinase C substrate                            | 0.401 | 0.020 | 0.120  | <b>0.556</b> | -0.077 | <b>0.660</b> |
| Cdcp2      | CUB domain containing protein 2                                                  | 0.400 | 0.025 | 0.682  | 0.008        | 0.096  | <b>0.468</b> |
| Clcnkb     | chloride channel Kb                                                              | 0.400 | 0.015 | 0.359  | 0.018        | -0.083 | <b>0.545</b> |
| Pde10a     | phosphodiesterase 10A                                                            | 0.400 | 0.020 | 0.406  | 0.020        | 0.170  | <b>0.910</b> |
| Tmem30b    | transmembrane protein 30B                                                        | 0.400 | 0.026 | -0.130 | <b>0.780</b> | -0.139 | <b>0.822</b> |
| Ptpnf      | protein tyrosine phosphatase, receptor type, F                                   | 0.399 | 0.019 | 0.014  | <b>0.329</b> | -0.034 | <b>0.438</b> |
| Klhl25     | kelch-like 25 (Drosophila)                                                       | 0.399 | 0.024 | 0.065  | <b>0.713</b> | -0.018 | <b>0.573</b> |

|            |                                                                         |       |       |        |              |        |              |
|------------|-------------------------------------------------------------------------|-------|-------|--------|--------------|--------|--------------|
| Cd3d       | CD3 molecule, delta                                                     | 0.398 | 0.018 | 0.460  | 0.014        | 0.731  | 0.004        |
| Bmp6       | bone morphogenetic protein 6                                            | 0.398 | 0.017 | 0.187  | <b>0.605</b> | 0.051  | <b>0.687</b> |
| Apaf1      | apoptotic peptidase activating factor 1                                 | 0.398 | 0.015 | 0.187  | <b>0.528</b> | 0.140  | <b>0.544</b> |
| Pc         | pyruvate carboxylase                                                    | 0.398 | 0.023 | 0.193  | <b>0.761</b> | 0.078  | <b>0.669</b> |
| Abcc3      | ATP-binding cassette, subfamily C (CFTR/MRP), member 3                  | 0.398 | 0.018 | 0.154  | <b>0.813</b> | 0.093  | <b>0.591</b> |
| Arrdc2     | arrestin domain containing 2                                            | 0.398 | 0.025 | 0.279  | <b>0.949</b> | 0.379  | 0.019        |
| Hbp1       | HMG-box transcription factor 1                                          | 0.397 | 0.014 | 0.151  | <b>0.732</b> | 0.087  | <b>0.701</b> |
| Rabgap1    | RAB GTPase activating protein 1                                         | 0.397 | 0.022 | 0.349  | 0.028        | 0.524  | 0.002        |
| RGD1309058 | similar to RIKEN cDNA 9830169C18                                        | 0.397 | 0.023 | 0.152  | <b>0.862</b> | -0.032 | <b>0.581</b> |
| Slc16a1    | solute carrier family 16, member 1 (monocarboxylic acid transporter 1)  | 0.397 | 0.023 | -0.002 | <b>0.495</b> | 0.019  | <b>0.499</b> |
| Stradb     | STE20-related kinase adaptor beta                                       | 0.396 | 0.026 | 0.089  | <b>0.806</b> | 0.043  | <b>0.740</b> |
| LOC301725  | similar to 60S ribosomal protein L35                                    | 0.395 | 0.027 | 0.297  | <b>0.977</b> | 0.158  | <b>0.782</b> |
| LOC679811  | similar to RIKEN cDNA D930015E06                                        | 0.395 | 0.026 | 0.292  | <b>0.795</b> | 0.158  | <b>0.564</b> |
| Mtus1      | microtubule associated tumor suppressor 1                               | 0.395 | 0.021 | 0.187  | <b>0.794</b> | 0.128  | <b>0.881</b> |
| Rab40b     | Rab40b, member RAS oncogene family                                      | 0.395 | 0.034 | 0.083  | <b>0.746</b> | -0.040 | <b>0.685</b> |
| LOC678708  | similar to histone 1, H2ai                                              | 0.395 | 0.025 | 0.023  | <b>0.682</b> | 0.028  | <b>0.629</b> |
| Aph1b      | anterior pharynx defective 1 homolog B (C. elegans)                     | 0.395 | 0.021 | 0.192  | <b>0.947</b> | 0.089  | <b>0.798</b> |
| LOC301816  | similar to Spindlin-like protein 2 (SPIN-2)                             | 0.394 | 0.035 | 0.066  | <b>0.481</b> | -0.046 | <b>0.200</b> |
| Gchfr      | GTP cyclohydrolase I feedback regulator                                 | 0.394 | 0.019 | 0.138  | <b>0.684</b> | -0.041 | <b>0.359</b> |
| Idh1       | isocitrate dehydrogenase 1 (NADP+), soluble                             | 0.394 | 0.026 | -0.026 | <b>0.608</b> | 0.079  | <b>0.516</b> |
| Klhc5      | kelch domain containing 5                                               | 0.394 | 0.013 | -0.022 | <b>0.429</b> | 0.066  | <b>0.624</b> |
| Ap2b1      | adaptor-related protein complex 2, beta 1 subunit                       | 0.394 | 0.010 | 0.287  | 0.022        | 0.167  | <b>0.055</b> |
| Neo1       | neogenin 1                                                              | 0.393 | 0.025 | 0.167  | <b>0.898</b> | 0.097  | <b>0.851</b> |
| Phf13      | PHD finger protein 13                                                   | 0.393 | 0.028 | 0.145  | <b>0.794</b> | -0.178 | <b>0.846</b> |
| LOC690137  | similar to transmembrane protein induced by tumor necrosis factor alpha | 0.393 | 0.019 | 0.146  | <b>0.581</b> | 0.159  | <b>0.588</b> |
| Cep68      | centrosomal protein 68                                                  | 0.393 | 0.024 | 0.347  | 0.029        | 0.203  | <b>0.950</b> |
| Plcx2      | phosphatidylinositol-specific phospholipase C, X domain containing 2    | 0.393 | 0.018 | -0.072 | <b>0.485</b> | -0.100 | <b>0.465</b> |
| Dsp        | desmoplakin                                                             | 0.392 | 0.019 | 0.291  | <b>0.985</b> | 0.352  | 0.019        |
| Tcf7l2     | transcription factor 7-like 2 (T-cell specific, HMG-box)                | 0.392 | 0.031 | 0.014  | <b>0.396</b> | 0.176  | <b>0.910</b> |
| Kcna7      | potassium voltage-gated channel, shaker-related subfamily, member 7     | 0.392 | 0.027 | 0.120  | <b>0.814</b> | 0.107  | <b>0.768</b> |
| Chad       | chondroadherin                                                          | 0.392 | 0.019 | 0.309  | 0.033        | 0.163  | <b>0.100</b> |
| Krtap13-2  | keratin associated protein 13-2                                         | 0.392 | 0.009 | -0.409 | 0.004        | -0.010 | <b>0.136</b> |
| Rfx5       | regulatory factor X, 5 (influences HLA class II expression)             | 0.391 | 0.023 | 0.900  | 0.001        | 0.231  | 0.038        |
| Dync1i1    | dynein cytoplasmic 1 intermediate chain 1                               | 0.391 | 0.010 | 0.145  | 0.029        | -0.260 | <b>0.452</b> |
| Amn        | amionless homolog (mouse)                                               | 0.391 | 0.011 | -0.163 | <b>0.470</b> | -0.315 | 0.017        |
| Sorl1      | sortilin-related receptor, LDLR class A repeats-containing              | 0.391 | 0.025 | 0.362  | <b>0.895</b> | 0.194  | <b>0.828</b> |
| RGD1310262 | hypothetical LOC304650                                                  | 0.391 | 0.027 | -0.202 | <b>0.796</b> | -0.321 | 0.019        |
| Pclo       | piccolo (presynaptic cytomatrix protein)                                | 0.391 | 0.028 | 0.184  | <b>0.639</b> | -0.111 | <b>0.778</b> |
| Zc3h13     | zinc finger CCCH type containing 13                                     | 0.390 | 0.013 | 0.519  | 0.002        | 0.623  | 0.000        |
| Trib3      | tribbles homolog 3 (Drosophila)                                         | 0.390 | 0.013 | -0.088 | 0.047        | 0.045  | <b>0.522</b> |
| Pmaip1     | phorbol-12-myristate-13-acetate-induced protein 1                       | 0.389 | 0.018 | 0.197  | <b>0.819</b> | 0.150  | <b>0.785</b> |
| Clrn2      | clarin 2                                                                | 0.389 | 0.036 | 0.072  | <b>0.803</b> | 0.108  | <b>0.860</b> |
| Sft2d2     | SFT2 domain containing 2                                                | 0.388 | 0.018 | -0.074 | <b>0.596</b> | 0.005  | <b>0.597</b> |
| Fam55c     | family with sequence similarity 55, member C                            | 0.388 | 0.022 | 0.362  | 0.031        | 0.429  | 0.015        |
| Iqgap1     | IQ motif containing GTPase activating protein 1                         | 0.388 | 0.021 | 0.156  | <b>0.716</b> | 0.027  | <b>0.606</b> |
| Tepp       | testis, prostate and placenta expressed                                 | 0.388 | 0.025 | 0.661  | 0.001        | 0.252  | <b>0.843</b> |
| Xiap       | X-linked inhibitor of apoptosis                                         | 0.388 | 0.028 | 0.039  | <b>0.450</b> | 0.152  | <b>0.798</b> |
| Ankib1     | ankyrin repeat and IBR domain containing 1                              | 0.388 | 0.024 | 0.055  | <b>0.401</b> | 0.023  | <b>0.492</b> |
| Lpo        | lactoperoxidase                                                         | 0.388 | 0.022 | 0.089  | <b>0.697</b> | 0.015  | <b>0.476</b> |
| LOC683498  | similar to Actin, aortic smooth muscle (Alpha-actin-2)                  | 0.388 | 0.030 | 0.003  | <b>0.576</b> | -0.034 | <b>0.620</b> |
| Scn4b      | sodium channel, voltage-gated, type IV, beta                            | 0.388 | 0.030 | 0.314  | 0.020        | -0.178 | <b>0.448</b> |
| Car4       | carbonic anhydrase 4                                                    | 0.388 | 0.015 | 0.345  | 0.015        | 0.293  | 0.015        |
| Gadd45a    | growth arrest and DNA-damage-inducible, alpha                           | 0.387 | 0.034 | 0.106  | <b>0.852</b> | 0.133  | <b>0.873</b> |
| Fam193a    | family with sequence similarity 193, member A                           | 0.387 | 0.029 | 0.438  | 0.014        | 0.354  | 0.035        |
| Zcchc11    | zinc finger, CCHC domain containing 11                                  | 0.387 | 0.031 | 0.123  | <b>0.915</b> | -0.029 | <b>0.695</b> |
| Plk1s1     | polo-like kinase 1 substrate 1                                          | 0.386 | 0.026 | 0.321  | <b>0.982</b> | 0.307  | 0.045        |

|            |                                                                                               |       |       |        |              |        |              |
|------------|-----------------------------------------------------------------------------------------------|-------|-------|--------|--------------|--------|--------------|
| Upf2       | UPF2 regulator of nonsense transcripts homolog (yeast)                                        | 0.386 | 0.032 | 0.024  | <b>0.679</b> | 0.057  | <b>0.793</b> |
| Exph5      | exophilin 5                                                                                   | 0.386 | 0.039 | 0.012  | <b>0.516</b> | 0.019  | <b>0.588</b> |
| Lmo4       | LIM domain only 4                                                                             | 0.386 | 0.024 | 0.189  | <b>0.871</b> | 0.220  | <b>0.928</b> |
| RT1-S3     | RT1 class Ib, locus S3                                                                        | 0.386 | 0.030 | 0.247  | 0.036        | 0.378  | 0.016        |
| Zfp217     | zinc finger protein 217                                                                       | 0.386 | 0.020 | 0.005  | <b>0.397</b> | -0.092 | <b>0.430</b> |
| Gpsm1      | G-protein signaling modulator 1                                                               | 0.385 | 0.022 | 0.002  | <b>0.492</b> | 0.133  | <b>0.725</b> |
| RGD1563680 | similar to CDNA sequence BC052040                                                             | 0.385 | 0.030 | 0.273  | <b>0.778</b> | 0.143  | <b>0.887</b> |
| RGD1308138 | similar to hypothetical protein LOC131368                                                     | 0.385 | 0.007 | -0.199 | 0.046        | -0.905 | 0.003        |
| Sf3a1      | splicing factor 3a, subunit 1                                                                 | 0.385 | 0.031 | 0.086  | <b>0.820</b> | 0.098  | <b>0.685</b> |
| Aqp11      | aquaporin 11                                                                                  | 0.385 | 0.024 | -0.001 | <b>0.481</b> | -0.172 | <b>0.791</b> |
| Synj2      | synaptojanin 2                                                                                | 0.385 | 0.031 | 0.164  | <b>0.705</b> | 0.141  | <b>0.906</b> |
| Vdr        | vitamin D (1,25-dihydroxyvitamin D3) receptor                                                 | 0.384 | 0.029 | -0.074 | <b>0.667</b> | -0.038 | <b>0.503</b> |
| Cd79b      | Cd79b molecule, immunoglobulin-associated beta                                                | 0.384 | 0.001 | 0.626  | 0.001        | 0.694  | 0.000        |
| Cnm4       | cyclin M4                                                                                     | 0.384 | 0.013 | -0.122 | <b>0.570</b> | 0.107  | <b>0.553</b> |
| Mpp5       | membrane protein, palmitoylated 5 (MAGUK p55 subfamily member 5)                              | 0.384 | 0.033 | 0.100  | <b>0.589</b> | 0.108  | <b>0.836</b> |
| Pla2g2a    | phospholipase A2, group IIA (platelets, synovial fluid)                                       | 0.383 | 0.004 | 0.213  | 0.014        | -0.225 | 0.008        |
| Prc1       | protein regulator of cytokinesis 1                                                            | 0.383 | 0.030 | -0.010 | <b>0.694</b> | 0.016  | <b>0.623</b> |
| Irs1       | insulin receptor substrate 1                                                                  | 0.383 | 0.022 | 0.338  | 0.033        | 0.067  | <b>0.624</b> |
| Hist1h3f   | histone cluster 1, H3f                                                                        | 0.383 | 0.024 | -0.089 | <b>0.674</b> | -0.035 | <b>0.416</b> |
| Mtus1      | microtubule associated tumor suppressor 1                                                     | 0.383 | 0.029 | 0.152  | <b>0.847</b> | -0.039 | <b>0.532</b> |
| Tob2       | transducer of ERBB2, 2                                                                        | 0.383 | 0.023 | 0.154  | <b>0.793</b> | -0.045 | <b>0.455</b> |
| Mfap3l     | microfibrillar-associated protein 3-like                                                      | 0.382 | 0.033 | -0.082 | <b>0.822</b> | -0.017 | <b>0.558</b> |
| Fgd4       | FYVE, RhoGEF and PH domain containing 4                                                       | 0.382 | 0.026 | 0.043  | <b>0.375</b> | -0.018 | <b>0.581</b> |
| Klf5       | Kruppel-like factor 5                                                                         | 0.382 | 0.030 | -0.035 | <b>0.556</b> | 0.030  | <b>0.383</b> |
| Nr1d1      | nuclear receptor subfamily 1, group D, member 1                                               | 0.382 | 0.020 | 0.285  | 0.023        | 1.336  | 0.000        |
| Phlpp1     | PH domain and leucine rich repeat protein phosphatase 1                                       | 0.381 | 0.031 | 0.220  | <b>0.965</b> | 0.137  | <b>0.870</b> |
| Kcnq1      | potassium voltage-gated channel, KQT-like subfamily, member 1                                 | 0.381 | 0.032 | 0.122  | <b>0.818</b> | -0.013 | <b>0.609</b> |
| Olr1261    | olfactory receptor 1261                                                                       | 0.381 | 0.020 | 0.221  | <b>0.752</b> | 0.135  | <b>0.824</b> |
| Fam117b    | family with sequence similarity 117, member B                                                 | 0.381 | 0.032 | 0.159  | <b>0.926</b> | 0.177  | <b>0.940</b> |
| LOC500846  | hypothetical protein LOC500846                                                                | 0.381 | 0.023 | 0.475  | 0.006        | 0.445  | 0.005        |
| Lifr       | leukemia inhibitory factor receptor alpha                                                     | 0.381 | 0.015 | 0.493  | 0.005        | 0.573  | 0.002        |
| Mphosph9   | M-phase phosphoprotein 9                                                                      | 0.381 | 0.031 | 0.147  | <b>0.841</b> | 0.199  | <b>0.949</b> |
| Olr428     | olfactory receptor 428                                                                        | 0.381 | 0.036 | 0.087  | <b>0.591</b> | -0.176 | <b>0.947</b> |
| Usp24      | ubiquitin specific protease 24                                                                | 0.380 | 0.020 | 0.247  | <b>0.754</b> | 0.316  | 0.039        |
| Rsl1d1     | ribosomal L1 domain containing 1                                                              | 0.380 | 0.028 | 0.222  | <b>0.697</b> | 0.031  | <b>0.562</b> |
| Plekhf2    | pleckstrin homology domain containing, family F (with FYVE domain) member 2                   | 0.380 | 0.013 | 0.093  | <b>0.484</b> | 0.015  | <b>0.348</b> |
| Pdlim5     | PDZ and LIM domain 5                                                                          | 0.379 | 0.023 | 0.104  | <b>0.260</b> | 0.215  | <b>0.690</b> |
| Crebl2     | cAMP responsive element binding protein-like 2                                                | 0.379 | 0.022 | 0.057  | <b>0.459</b> | 0.071  | <b>0.625</b> |
| Klhl14     | kelch-like 14 (Drosophila)                                                                    | 0.379 | 0.046 | 0.104  | 0.041        | 0.268  | <b>0.068</b> |
| Ptbp3      | polypyrimidine tract binding protein 3                                                        | 0.378 | 0.031 | 0.007  | <b>0.481</b> | 0.147  | <b>0.850</b> |
| Trove2     | TROVE domain family, member 2                                                                 | 0.378 | 0.030 | 0.043  | <b>0.735</b> | 0.060  | <b>0.763</b> |
| Olr1145    | olfactory receptor 1145                                                                       | 0.378 | 0.032 | 0.059  | <b>0.611</b> | -0.069 | <b>0.757</b> |
| Mfhas1     | malignant fibrous histiocytoma amplified sequence 1                                           | 0.377 | 0.034 | 0.384  | 0.019        | 0.247  | <b>0.958</b> |
| Plekhf2    | pleckstrin homology domain containing, family F (with FYVE domain) member 2                   | 0.377 | 0.031 | 0.084  | <b>0.640</b> | -0.006 | <b>0.509</b> |
| Fam100b    | family with sequence similarity 100, member B                                                 | 0.377 | 0.034 | 0.123  | <b>0.889</b> | 0.048  | <b>0.780</b> |
| LOC687808  | similar to solute carrier family 16 (monocarboxylic acid transporters), member 9              | 0.376 | 0.017 | 0.188  | <b>0.840</b> | 0.122  | <b>0.686</b> |
| C1galt1    | core 1 synthase, glycoprotein-N-acetylgalactosamine 3-beta-galactosyltransferase, 1           | 0.376 | 0.031 | -0.145 | <b>0.831</b> | 0.037  | <b>0.640</b> |
| LOC683422  | similar to Plasma kallikrein precursor (Plasma prekallikrein) (Kininogenin) (Fletcher factor) | 0.376 | 0.034 | 0.516  | 0.005        | 0.457  | 0.011        |
| Sort1      | sortilin 1                                                                                    | 0.376 | 0.031 | 0.082  | <b>0.774</b> | -0.078 | <b>0.762</b> |
| Camk4      | calcium/calmodulin-dependent protein kinase IV                                                | 0.376 | 0.042 | 0.326  | <b>0.484</b> | 0.600  | 0.011        |
| Ezh1       | enhancer of zeste homolog 1 (Drosophila)                                                      | 0.375 | 0.031 | 0.162  | <b>0.933</b> | 0.096  | <b>0.833</b> |
| Alms1      | Alstrom syndrome 1 homolog (human)                                                            | 0.375 | 0.039 | 0.200  | <b>0.851</b> | 0.241  | <b>0.949</b> |
| Ggt7       | gamma-glutamyltransferase 7                                                                   | 0.375 | 0.032 | 0.197  | <b>0.892</b> | 0.060  | <b>0.704</b> |
| Paqr5      | progesterin and adipoQ receptor family member V                                               | 0.375 | 0.027 | -0.069 | <b>0.580</b> | -0.143 | <b>0.662</b> |

|            |                                                                                                         |       |       |        |              |        |              |
|------------|---------------------------------------------------------------------------------------------------------|-------|-------|--------|--------------|--------|--------------|
| Cyp2d4     | cytochrome P450, family 2, subfamily d, polypeptide 4                                                   | 0.375 | 0.035 | 0.093  | <b>0.846</b> | -0.138 | <b>0.882</b> |
| Tnrc6b     | trinucleotide repeat containing 6B                                                                      | 0.375 | 0.020 | 0.097  | <b>0.481</b> | 0.172  | <b>0.749</b> |
| Lrrc8a     | leucine rich repeat containing 8 family, member A                                                       | 0.374 | 0.031 | 0.003  | <b>0.416</b> | -0.099 | <b>0.557</b> |
| Olr546     | olfactory receptor 546                                                                                  | 0.374 | 0.025 | 0.118  | <b>0.754</b> | 0.039  | <b>0.549</b> |
| Tmem164    | transmembrane protein 164                                                                               | 0.374 | 0.025 | 0.086  | <b>0.517</b> | 0.068  | <b>0.557</b> |
| LOC498236  | LRRGT00186                                                                                              | 0.373 | 0.032 | 0.414  | 0.020        | 0.237  | <b>0.928</b> |
| RGD1310788 | similar to RIKEN cDNA 0610039P13                                                                        | 0.373 | 0.006 | 0.298  | 0.011        | 0.406  | 0.004        |
| Crlf1      | cytokine receptor-like factor 1                                                                         | 0.373 | 0.039 | -0.195 | <b>0.838</b> | -0.321 | <b>0.944</b> |
| RGD1561416 | similar to novel protein (HT036)                                                                        | 0.373 | 0.028 | -0.047 | <b>0.506</b> | -0.104 | <b>0.627</b> |
| Rap2a      | RAS related protein 2a                                                                                  | 0.373 | 0.025 | 0.051  | <b>0.695</b> | 0.081  | <b>0.754</b> |
| RGD1564712 | RGD1564712                                                                                              | 0.372 | 0.024 | 0.269  | 0.031        | 0.230  | 0.040        |
| Atoh8      | atonal homolog 8 (Drosophila)                                                                           | 0.372 | 0.039 | 0.168  | <b>0.906</b> | -0.034 | <b>0.671</b> |
| Cck        | cholecystokinin                                                                                         | 0.372 | 0.030 | 0.005  | <b>0.427</b> | 0.118  | <b>0.771</b> |
| Abhd2      | abhydrolase domain containing 2                                                                         | 0.371 | 0.029 | 0.001  | <b>0.395</b> | 0.201  | <b>0.846</b> |
| Slc15a4    | solute carrier family 15, member 4                                                                      | 0.371 | 0.024 | 0.297  | <b>0.916</b> | 0.239  | <b>0.864</b> |
| Tesk2      | testis-specific kinase 2                                                                                | 0.371 | 0.028 | 0.009  | <b>0.595</b> | -0.056 | <b>0.643</b> |
| Abhd1      | abhydrolase domain containing 1                                                                         | 0.371 | 0.033 | 0.134  | <b>0.852</b> | -0.103 | <b>0.841</b> |
| Insr       | insulin receptor                                                                                        | 0.371 | 0.034 | -0.105 | <b>0.685</b> | -0.188 | <b>0.933</b> |
| E2f1       | E2F transcription factor 1                                                                              | 0.370 | 0.027 | 0.192  | <b>0.906</b> | -0.049 | <b>0.603</b> |
| RT1-CE3    | RT1 class I, locus CE3                                                                                  | 0.370 | 0.047 | 0.333  | <b>0.942</b> | 0.295  | <b>0.991</b> |
| Nfrkb      | nuclear factor related to kappa B binding protein                                                       | 0.370 | 0.040 | 0.308  | <b>0.952</b> | 0.328  | 0.050        |
| LOC312502  | similar to RAB11 family interacting protein 5 (class I) isoform 1                                       | 0.370 | 0.020 | 0.134  | <b>0.608</b> | -0.112 | <b>0.465</b> |
| Sp4        | Sp4 transcription factor                                                                                | 0.370 | 0.040 | 0.079  | <b>0.659</b> | 0.012  | <b>0.436</b> |
| Ctnn       | cortactin                                                                                               | 0.369 | 0.044 | 0.033  | <b>0.344</b> | -0.027 | <b>0.462</b> |
| Lamp3      | lysosomal-associated membrane protein 3                                                                 | 0.369 | 0.020 | 0.307  | <b>0.696</b> | 0.371  | <b>0.058</b> |
| Tmem102    | transmembrane protein 102                                                                               | 0.369 | 0.026 | 0.015  | <b>0.387</b> | -0.132 | <b>0.714</b> |
| Ripk4      | receptor-interacting serine-threonine kinase 4                                                          | 0.369 | 0.047 | -0.070 | <b>0.683</b> | -0.283 | <b>0.990</b> |
| Pex11a     | peroxisomal biogenesis factor 11 alpha                                                                  | 0.369 | 0.019 | 0.078  | <b>0.619</b> | -0.067 | <b>0.542</b> |
| Foxk1      | forkhead box K1                                                                                         | 0.368 | 0.043 | 0.297  | <b>0.979</b> | 0.337  | 0.040        |
| Per3       | period homolog 3 (Drosophila)                                                                           | 0.368 | 0.035 | 0.077  | <b>0.766</b> | -0.043 | <b>0.653</b> |
| Slk        | STE20-like kinase                                                                                       | 0.368 | 0.034 | 0.189  | <b>0.902</b> | 0.166  | <b>0.869</b> |
| Tnik       | TRAF2 and NCK interacting kinase                                                                        | 0.368 | 0.029 | 0.300  | <b>0.927</b> | 0.310  | 0.035        |
| Stard13    | StAR-related lipid transfer (START) domain containing 13                                                | 0.367 | 0.042 | 0.241  | <b>0.897</b> | 0.106  | <b>0.872</b> |
| Inadl2     | InaD-like 2 (Drosophila)                                                                                | 0.367 | 0.037 | 0.003  | <b>0.652</b> | -0.017 | <b>0.630</b> |
| Kdm1b      | lysine (K)-specific demethylase 1B                                                                      | 0.367 | 0.037 | 0.091  | <b>0.786</b> | 0.171  | <b>0.845</b> |
| Sectm1b    | secreted and transmembrane 1B                                                                           | 0.367 | 0.010 | -0.473 | 0.007        | -0.406 | 0.010        |
| RGD1563169 | similar to hypothetical protein 4930474N05                                                              | 0.367 | 0.025 | 0.071  | <b>0.677</b> | 0.063  | <b>0.568</b> |
| Cd27       | CD27 molecule                                                                                           | 0.366 | 0.005 | 0.924  | 0.001        | 1.006  | 0.000        |
| Sfxn5      | sideroflexin 5                                                                                          | 0.366 | 0.036 | 0.100  | <b>0.710</b> | 0.022  | <b>0.695</b> |
| Spred2     | sprouty-related, EVH1 domain containing 2                                                               | 0.365 | 0.038 | 0.152  | <b>0.894</b> | 0.115  | <b>0.833</b> |
| Vill       | villin-like                                                                                             | 0.365 | 0.035 | 0.220  | <b>0.866</b> | 0.098  | <b>0.658</b> |
| Pdcd4      | programmed cell death 4                                                                                 | 0.365 | 0.034 | 0.068  | <b>0.709</b> | 0.027  | <b>0.560</b> |
| Pdp1       | pyruvate dehydrogenase phosphatase catalytic subunit 1                                                  | 0.365 | 0.036 | 0.403  | 0.027        | 0.194  | <b>0.939</b> |
| Adra1b     | adrenergic, alpha-1B-, receptor                                                                         | 0.365 | 0.028 | 0.189  | <b>0.800</b> | -0.091 | <b>0.720</b> |
| Tas2r120   | taste receptor, type 2, member 120                                                                      | 0.365 | 0.046 | 0.286  | <b>0.837</b> | -0.066 | <b>0.656</b> |
| Tmco4      | transmembrane and coiled-coil domains 4                                                                 | 0.365 | 0.037 | -0.032 | <b>0.623</b> | -0.106 | <b>0.756</b> |
| Ctdspl2    | CTD (carboxy-terminal domain, RNA polymerase II, polypeptide A) small phosphatase like 2                | 0.364 | 0.021 | 0.053  | <b>0.561</b> | 0.047  | <b>0.610</b> |
| Grb7       | growth factor receptor bound protein 7                                                                  | 0.364 | 0.035 | 0.154  | <b>0.432</b> | 0.080  | <b>0.835</b> |
| Olr1421    | olfactory receptor 1421                                                                                 | 0.364 | 0.004 | -0.361 | <b>0.055</b> | -0.534 | 0.015        |
| LOC501110  | similar to Glutathione S-transferase A1 (GTH1) (HA subunit 1) (GST-epsilon) (GSTA1-1) (GST class-alpha) | 0.364 | 0.007 | 0.505  | 0.004        | 0.438  | 0.004        |
| Neo1       | neogenin 1                                                                                              | 0.364 | 0.033 | 0.149  | <b>0.870</b> | 0.060  | <b>0.741</b> |
| RGD1564961 | similar to retinoblastoma-binding protein 1 isoform I                                                   | 0.364 | 0.041 | -0.001 | <b>0.558</b> | 0.127  | <b>0.787</b> |
| Fam211a    | family with sequence similarity 211, member A                                                           | 0.363 | 0.041 | 0.084  | <b>0.751</b> | -0.013 | <b>0.533</b> |
| Rnf216     | ring finger protein 216                                                                                 | 0.363 | 0.042 | 0.267  | <b>0.933</b> | 0.153  | <b>0.933</b> |
| Tmem231    | transmembrane protein 231                                                                               | 0.363 | 0.031 | 0.160  | <b>0.706</b> | 0.079  | <b>0.450</b> |
| Capza1     | capping protein (actin filament) muscle Z-line, alpha 1                                                 | 0.363 | 0.021 | 0.108  | <b>0.450</b> | 0.101  | <b>0.410</b> |
| Lamc2      | laminin, gamma 2                                                                                        | 0.362 | 0.033 | 0.149  | <b>0.727</b> | 0.154  | <b>0.866</b> |
| Prf1       | perforin 1 (pore forming protein)                                                                       | 0.362 | 0.028 | 0.532  | 0.011        | 0.717  | 0.002        |

|              |                                                                          |       |       |        |              |        |              |
|--------------|--------------------------------------------------------------------------|-------|-------|--------|--------------|--------|--------------|
| RGD1308878   | similar to arylacetamide deacetylase                                     | 0.362 | 0.018 | 0.269  | <b>0.782</b> | 0.281  | 0.026        |
| Clip1        | CAP-GLY domain containing linker protein 1                               | 0.362 | 0.039 | 0.085  | <b>0.809</b> | 0.078  | <b>0.831</b> |
| Nrgn         | neurogranin                                                              | 0.362 | 0.028 | 0.152  | <b>0.596</b> | -0.037 | <b>0.459</b> |
| RGD1562037   | similar to OTTHUMP00000046255                                            | 0.362 | 0.044 | 0.275  | <b>0.935</b> | -0.088 | <b>0.876</b> |
| Atp7a        | ATPase, Cu <sup>++</sup> transporting, alpha polypeptide                 | 0.362 | 0.035 | 0.093  | <b>0.768</b> | 0.121  | <b>0.861</b> |
| Fbxl8        | F-box and leucine-rich repeat protein 8                                  | 0.361 | 0.043 | 0.026  | <b>0.658</b> | 0.038  | <b>0.500</b> |
| Esm1         | endothelial cell-specific molecule 1                                     | 0.361 | 0.019 | -0.266 | <b>0.733</b> | -0.578 | 0.001        |
| Mam1         | mastermind like 1 (Drosophila)                                           | 0.361 | 0.038 | 0.093  | <b>0.801</b> | 0.134  | <b>0.756</b> |
| Ednrb        | endothelin receptor type B                                               | 0.361 | 0.023 | 0.136  | <b>0.772</b> | 0.024  | <b>0.392</b> |
| Rtf1         | Rtf1, Paf1/RNA polymerase II complex component, homolog (S. cerevisiae)  | 0.360 | 0.034 | 0.275  | <b>0.975</b> | 0.327  | 0.038        |
| Ccrn4l       | CCR4 carbon catabolite repression 4-like (S. cerevisiae)                 | 0.360 | 0.042 | 0.098  | <b>0.715</b> | -0.065 | <b>0.674</b> |
| Arhgap35     | Rho GTPase activating protein 35                                         | 0.360 | 0.042 | 0.214  | <b>0.840</b> | 0.193  | <b>0.654</b> |
| Wfdc3        | WAP four-disulfide core domain 3                                         | 0.360 | 0.019 | -0.128 | <b>0.492</b> | 0.013  | <b>0.181</b> |
| Lrp4         | low density lipoprotein receptor-related protein 4                       | 0.360 | 0.035 | 0.224  | <b>0.847</b> | 0.047  | <b>0.634</b> |
| Ppapdc2      | phosphatidic acid phosphatase type 2 domain containing 2                 | 0.360 | 0.049 | 0.040  | <b>0.769</b> | 0.003  | <b>0.668</b> |
| Ficd         | FIC domain containing                                                    | 0.360 | 0.028 | 0.110  | <b>0.621</b> | 0.027  | <b>0.497</b> |
| Atoh8        | atonal homolog 8 (Drosophila)                                            | 0.359 | 0.041 | 0.165  | <b>0.882</b> | -0.101 | <b>0.762</b> |
| Pfas         | phosphoribosylformylglycinamide synthase                                 | 0.359 | 0.034 | 0.126  | <b>0.863</b> | 0.101  | <b>0.873</b> |
| Grid2ip      | glutamate receptor, ionotropic, delta 2 (Grid2) interacting protein      | 0.359 | 0.016 | -0.107 | <b>0.389</b> | -0.234 | <b>0.648</b> |
| RGD1564964   | similar to WD repeat domain 11 protein                                   | 0.359 | 0.022 | 0.181  | <b>0.483</b> | 0.286  | 0.033        |
| Tspan33      | tetraspanin 33                                                           | 0.358 | 0.018 | 0.147  | <b>0.564</b> | 0.046  | <b>0.388</b> |
| Arx          | aristaless related homeobox                                              | 0.358 | 0.043 | 0.218  | <b>0.952</b> | 0.129  | <b>0.897</b> |
| Sp4          | Sp4 transcription factor                                                 | 0.358 | 0.046 | -0.020 | <b>0.588</b> | -0.045 | <b>0.584</b> |
| Clic5        | chloride intracellular channel 5                                         | 0.358 | 0.028 | 0.103  | <b>0.709</b> | 0.029  | <b>0.297</b> |
| Trim23       | tripartite motif-containing 23                                           | 0.358 | 0.030 | 0.186  | <b>0.889</b> | 0.304  | 0.038        |
| aicda        | activation-induced cytidine deaminase                                    | 0.357 | 0.046 | 0.446  | 0.020        | 0.733  | 0.007        |
| Inpp4b       | inositol polyphosphate-4-phosphatase, type II                            | 0.357 | 0.028 | 0.260  | <b>0.471</b> | 0.382  | 0.021        |
| Slco6d1      | solute carrier organic anion transporter family, member 6d1              | 0.357 | 0.029 | -0.008 | <b>0.447</b> | -0.105 | <b>0.514</b> |
| Cables1      | Cdk5 and Abl enzyme substrate 1                                          | 0.356 | 0.041 | 0.008  | <b>0.586</b> | -0.179 | <b>0.960</b> |
| Pigv         | phosphatidylinositol glycan anchor biosynthesis, class V                 | 0.356 | 0.041 | 0.106  | <b>0.773</b> | 0.117  | <b>0.867</b> |
| Akap13       | A kinase (PRKA) anchor protein 13                                        | 0.356 | 0.042 | 0.344  | <b>0.980</b> | 0.235  | <b>0.813</b> |
| Syt12        | synaptotagmin XII                                                        | 0.356 | 0.040 | 0.317  | <b>0.991</b> | 0.123  | <b>0.893</b> |
| Rab32        | RAB32, member RAS oncogene family                                        | 0.355 | 0.041 | 0.113  | <b>0.672</b> | 0.192  | <b>0.873</b> |
| Cbl          | Cas-Br-M (murine) ecotropic retroviral transforming sequence             | 0.355 | 0.037 | 0.228  | <b>0.939</b> | 0.301  | <b>0.055</b> |
| LOC100359930 | Cyp2s1 protein-like                                                      | 0.355 | 0.040 | 0.206  | <b>0.873</b> | 0.064  | <b>0.651</b> |
| Odf3l1       | outer dense fiber of sperm tails 3-like 1                                | 0.355 | 0.034 | 0.163  | <b>0.893</b> | -0.173 | <b>0.916</b> |
| Tmco4        | transmembrane and coiled-coil domains 4                                  | 0.355 | 0.041 | 0.095  | <b>0.781</b> | 0.010  | <b>0.658</b> |
| LOC100363229 | hypothetical protein LOC100363229                                        | 0.355 | 0.032 | 0.485  | 0.006        | 0.452  | 0.006        |
| Atp1b1       | ATPase, Na <sup>+</sup> /K <sup>+</sup> transporting, beta 1 polypeptide | 0.354 | 0.029 | -0.002 | <b>0.404</b> | -0.097 | <b>0.589</b> |
| Rchy1        | ring finger and CHY zinc finger domain containing 1                      | 0.354 | 0.035 | 0.001  | <b>0.484</b> | -0.043 | <b>0.624</b> |
| Avpr1b       | arginine vasopressin receptor 1B                                         | 0.354 | 0.044 | 0.106  | <b>0.807</b> | 0.016  | <b>0.649</b> |
| Spns2        | spinster homolog 2                                                       | 0.354 | 0.041 | 0.084  | <b>0.731</b> | -0.197 | <b>0.842</b> |
| Gna14        | guanine nucleotide binding protein, alpha 14                             | 0.353 | 0.025 | 0.046  | <b>0.565</b> | 0.169  | <b>0.752</b> |
| Cables1      | Cdk5 and Abl enzyme substrate 1                                          | 0.353 | 0.039 | -0.110 | <b>0.815</b> | -0.211 | <b>0.939</b> |
| Marveld3     | MARVEL domain containing 3                                               | 0.352 | 0.039 | 0.077  | <b>0.732</b> | 0.119  | <b>0.833</b> |
| Fam134b      | family with sequence similarity 134, member B                            | 0.352 | 0.042 | 0.081  | <b>0.780</b> | 0.200  | <b>0.876</b> |
| Zcchc2       | zinc finger, CCHC domain containing 2                                    | 0.352 | 0.031 | 0.167  | <b>0.799</b> | 0.255  | <b>0.056</b> |
| Olr715       | olfactory receptor 715                                                   | 0.352 | 0.028 | 0.297  | <b>0.948</b> | 0.293  | 0.040        |
| Duox2        | dual oxidase 2                                                           | 0.352 | 0.037 | 0.148  | <b>0.701</b> | -0.041 | <b>0.363</b> |
| Luzp1        | leucine zipper protein 1                                                 | 0.351 | 0.049 | 0.041  | <b>0.672</b> | 0.064  | <b>0.768</b> |
| Vgll1        | vestigial like 1 (Drosophila)                                            | 0.350 | 0.045 | 0.211  | <b>0.963</b> | 0.281  | <b>0.059</b> |
| Sry          | sex determining region Y                                                 | 0.350 | 0.030 | 0.079  | <b>0.337</b> | -0.211 | <b>0.854</b> |
| Foxo3        | forkhead box O3                                                          | 0.350 | 0.026 | 0.104  | <b>0.664</b> | 0.145  | <b>0.764</b> |
| LOC684444    | similar to H1Stone family member (his-41)                                | 0.350 | 0.035 | 0.356  | 0.021        | 0.232  | <b>0.876</b> |
| Tmem45b      | transmembrane protein 45b                                                | 0.350 | 0.034 | -0.104 | <b>0.833</b> | -0.185 | <b>0.905</b> |
| Tp53bp2      | tumor protein p53 binding protein, 2                                     | 0.350 | 0.043 | -0.031 | <b>0.682</b> | 0.081  | <b>0.734</b> |
| Slc16a5      | solute carrier family 16, member 5 (monocarboxylic acid transporter 6)   | 0.350 | 0.046 | 0.467  | 0.011        | 0.288  | <b>0.984</b> |
| Man2a1       | mannosidase, alpha, class 2A, member 1                                   | 0.350 | 0.047 | -0.007 | <b>0.676</b> | -0.014 | <b>0.633</b> |

|            |                                                                                                |       |       |        |              |        |              |
|------------|------------------------------------------------------------------------------------------------|-------|-------|--------|--------------|--------|--------------|
| Abtb2      | ankyrin repeat and BTB (POZ) domain containing 2                                               | 0.349 | 0.045 | 0.094  | <b>0.757</b> | 0.271  | <b>0.972</b> |
| Fam115c    | family with sequence similarity 115, member C                                                  | 0.349 | 0.027 | 0.175  | <b>0.840</b> | 0.272  | 0.037        |
| Kdm2a      | lysine (K)-specific demethylase 2A                                                             | 0.349 | 0.044 | 0.233  | <b>0.898</b> | 0.285  | <b>0.057</b> |
| Arhgap24   | Rho GTPase activating protein 24                                                               | 0.349 | 0.038 | 0.374  | 0.023        | -0.223 | <b>0.942</b> |
| Sdr42e1    | short chain dehydrogenase/reductase family 42E, member 1                                       | 0.349 | 0.040 | -0.068 | <b>0.651</b> | -0.127 | <b>0.718</b> |
| LOC689963  | hypothetical protein LOC689963                                                                 | 0.348 | 0.043 | -0.084 | <b>0.756</b> | 0.042  | <b>0.681</b> |
| Napepld    | N-acyl phosphatidylethanolamine phospholipase D                                                | 0.348 | 0.032 | -0.155 | <b>0.654</b> | -0.139 | <b>0.549</b> |
| Vsig8      | V-set and immunoglobulin domain containing 8                                                   | 0.348 | 0.018 | 0.092  | <b>0.477</b> | 0.054  | <b>0.427</b> |
| Baiap2l1   | BAI1-associated protein 2-like 1                                                               | 0.348 | 0.042 | -0.007 | <b>0.532</b> | -0.024 | <b>0.576</b> |
| Pnp        | purine nucleoside phosphorylase                                                                | 0.348 | 0.043 | 0.131  | <b>0.772</b> | 0.022  | <b>0.515</b> |
| Lbp        | lipopolysaccharide binding protein                                                             | 0.348 | 0.004 | 0.398  | 0.006        | 0.202  | 0.015        |
| LOC680448  | similar to protocadherin gamma subfamily B, 5                                                  | 0.348 | 0.043 | 0.247  | <b>0.888</b> | 0.015  | <b>0.548</b> |
| Prl8a9     | prolactin family 8, subfamily a, member 9                                                      | 0.348 | 0.029 | -0.026 | <b>0.282</b> | 0.155  | <b>0.067</b> |
| Fam120a    | family with sequence similarity 120A                                                           | 0.347 | 0.044 | 0.061  | <b>0.360</b> | 0.098  | <b>0.824</b> |
| Tmem184b   | transmembrane protein 184B                                                                     | 0.347 | 0.042 | 0.005  | <b>0.517</b> | -0.082 | <b>0.732</b> |
| Baz2a      | bromodomain adjacent to zinc finger domain, 2A                                                 | 0.347 | 0.036 | 0.286  | <b>0.861</b> | 0.252  | <b>0.820</b> |
| Entpd2     | ectonucleoside triphosphate diphosphohydrolase 2                                               | 0.347 | 0.046 | 0.125  | <b>0.820</b> | 0.017  | <b>0.632</b> |
| Eml2       | echinoderm microtubule associated protein like 2                                               | 0.347 | 0.011 | 0.157  | 0.033        | 0.198  | 0.026        |
| Man1a2     | mannosidase, alpha, class 1A, member 2                                                         | 0.347 | 0.049 | -0.019 | <b>0.640</b> | 0.138  | <b>0.882</b> |
| S100a13    | S100 calcium binding protein A13                                                               | 0.347 | 0.037 | 0.076  | <b>0.539</b> | 0.102  | <b>0.655</b> |
| LOC683313  | similar to keratin complex 2, basic, gene 6a                                                   | 0.347 | 0.030 | 0.222  | <b>0.912</b> | 0.202  | <b>0.830</b> |
| Slc35a3    | solute carrier family 35 (UDP-N-acetylglucosamine (UDP-GlcNAc) transporter), member A3         | 0.347 | 0.041 | -0.557 | 0.001        | -0.413 | 0.006        |
| Rdx        | radixin                                                                                        | 0.346 | 0.042 | 0.185  | <b>0.830</b> | 0.081  | <b>0.799</b> |
| A1i3       | alpha-1-inhibitor III                                                                          | 0.346 | 0.030 | 0.030  | <b>0.489</b> | -0.155 | <b>0.669</b> |
| Lmo1       | LIM domain only 1                                                                              | 0.346 | 0.041 | -0.046 | <b>0.685</b> | -0.251 | <b>0.962</b> |
| Serpinb6b  | serine (or cysteine) peptidase inhibitor, clade B, member 6b                                   | 0.346 | 0.020 | 0.466  | 0.024        | 0.692  | 0.006        |
| LOC498972  | similar to copine II                                                                           | 0.346 | 0.027 | 0.150  | <b>0.869</b> | -0.061 | <b>0.610</b> |
| Usp51      | ubiquitin specific peptidase 51                                                                | 0.345 | 0.032 | 0.021  | <b>0.248</b> | 0.059  | <b>0.571</b> |
| Gss        | glutathione synthetase                                                                         | 0.345 | 0.049 | 0.085  | <b>0.788</b> | 0.023  | <b>0.737</b> |
| RGD1308019 | similar to hypothetical protein FLJ20245                                                       | 0.344 | 0.014 | 0.128  | <b>0.544</b> | 0.047  | <b>0.450</b> |
| Ugt1a6     | UDP glucuronosyltransferase 1 family, polypeptide A6                                           | 0.344 | 0.044 | 0.019  | <b>0.514</b> | -0.016 | <b>0.509</b> |
| Ctnd1      | catenin (cadherin associated protein), delta 1                                                 | 0.344 | 0.016 | 0.020  | <b>0.303</b> | 0.344  | 0.011        |
| Rhobtb3    | Rho-related BTB domain containing 3                                                            | 0.344 | 0.033 | 0.102  | <b>0.623</b> | 0.076  | <b>0.703</b> |
| Cenpq      | centromere protein Q                                                                           | 0.343 | 0.038 | -0.012 | <b>0.514</b> | -0.114 | <b>0.729</b> |
| Med28      | mediator complex subunit 28                                                                    | 0.343 | 0.043 | 0.021  | <b>0.565</b> | -0.007 | <b>0.429</b> |
| Olr155     | olfactory receptor 155                                                                         | 0.343 | 0.049 | 0.165  | <b>0.939</b> | 0.253  | <b>0.987</b> |
| Clec2d1    | C-type lectin domain family 2 member D-like 1                                                  | 0.342 | 0.020 | 0.110  | <b>0.666</b> | 0.162  | <b>0.770</b> |
| Disp1      | dispatched homolog 1 (Drosophila)                                                              | 0.342 | 0.048 | 0.231  | <b>0.910</b> | 0.015  | <b>0.607</b> |
| Crebbp     | CREB binding protein                                                                           | 0.342 | 0.045 | 0.088  | <b>0.664</b> | 0.238  | <b>0.917</b> |
| Kif18b     | kinesin family member 18B                                                                      | 0.342 | 0.041 | 0.097  | <b>0.475</b> | -0.020 | <b>0.522</b> |
| Msc        | musculin                                                                                       | 0.341 | 0.046 | 0.416  | 0.015        | 0.200  | <b>0.868</b> |
| LOC684745  | similar to germinal histone H4 gene                                                            | 0.341 | 0.045 | -0.101 | <b>0.800</b> | 0.034  | <b>0.704</b> |
| Cxxc4      | CXXC finger protein 4                                                                          | 0.341 | 0.032 | -0.124 | <b>0.545</b> | -0.210 | <b>0.825</b> |
| LOC679800  | similar to MIC2 like 1                                                                         | 0.341 | 0.042 | 0.131  | <b>0.750</b> | 0.127  | <b>0.780</b> |
| Gpr19      | G protein-coupled receptor 19                                                                  | 0.341 | 0.047 | 0.240  | <b>0.944</b> | 0.001  | <b>0.649</b> |
| RGD1308907 | similar to FLJ20689                                                                            | 0.341 | 0.049 | 0.055  | <b>0.632</b> | 0.194  | <b>0.927</b> |
| LOC683410  | similar to ankyrin repeat domain 33                                                            | 0.340 | 0.034 | 0.015  | <b>0.383</b> | 0.121  | <b>0.550</b> |
| Dgkd       | diacylglycerol kinase, delta                                                                   | 0.339 | 0.026 | 0.070  | <b>0.515</b> | 0.271  | 0.027        |
| Herpud1    | homocysteine-inducible, endoplasmic reticulum stress-inducible, ubiquitin-like domain member 1 | 0.339 | 0.035 | 0.407  | 0.015        | 0.519  | 0.002        |
| Sh3rf2     | SH3 domain containing ring finger 2                                                            | 0.339 | 0.048 | 0.050  | <b>0.787</b> | -0.084 | <b>0.790</b> |
| Dgcr8      | DiGeorge syndrome critical region gene 8                                                       | 0.338 | 0.046 | 0.283  | <b>0.932</b> | 0.064  | <b>0.543</b> |
| Upp2       | uridine phosphorylase 2                                                                        | 0.338 | 0.047 | 0.093  | <b>0.723</b> | 0.237  | <b>0.849</b> |
| Osbp2      | oxysterol binding protein 2                                                                    | 0.338 | 0.045 | 0.045  | <b>0.553</b> | -0.087 | <b>0.757</b> |
| Car15      | carbonic anhydrase 15                                                                          | 0.338 | 0.046 | 0.137  | <b>0.846</b> | -0.064 | <b>0.680</b> |
| Prkab2     | protein kinase, AMP-activated, beta 2 non-catalytic subunit                                    | 0.338 | 0.039 | 0.722  | 0.000        | 0.344  | 0.019        |
| Atp10b     | ATPase, class V, type 10B                                                                      | 0.337 | 0.037 | 0.051  | <b>0.584</b> | -0.054 | <b>0.589</b> |
| Tmem132c   | transmembrane protein 132C                                                                     | 0.337 | 0.047 | 0.391  | 0.015        | -0.128 | <b>0.837</b> |
| Trim31     | tripartite motif-containing 31                                                                 | 0.337 | 0.046 | -0.038 | <b>0.650</b> | 0.037  | <b>0.352</b> |
| Foxd2      | forkhead box D2                                                                                | 0.337 | 0.043 | 0.041  | <b>0.692</b> | 0.137  | <b>0.854</b> |



|              |                                                                                            |       |       |        |              |        |              |
|--------------|--------------------------------------------------------------------------------------------|-------|-------|--------|--------------|--------|--------------|
| Gpa33        | glycoprotein A33 (transmembrane)                                                           | 0.337 | 0.047 | 0.091  | <b>0.766</b> | 0.074  | <b>0.667</b> |
| Ptprk        | protein tyrosine phosphatase, receptor type, K, extracellular region                       | 0.337 | 0.046 | 0.142  | <b>0.849</b> | 0.138  | <b>0.870</b> |
| Serinc5      | serine incorporator 5                                                                      | 0.337 | 0.048 | 0.041  | <b>0.705</b> | 0.018  | <b>0.738</b> |
| Wdr11        | WD repeat domain 11                                                                        | 0.336 | 0.047 | 0.066  | <b>0.735</b> | 0.072  | <b>0.727</b> |
| Slc10a5      | solute carrier family 10 (sodium/bile acid cotransporter family), member 5                 | 0.336 | 0.029 | -0.055 | <b>0.583</b> | 0.265  | 0.044        |
| Timp4        | tissue inhibitor of metalloproteinase 4                                                    | 0.336 | 0.040 | 0.062  | <b>0.642</b> | -0.185 | <b>0.853</b> |
| Gpr21        | G protein-coupled receptor 21                                                              | 0.336 | 0.042 | 0.383  | 0.021        | 0.557  | 0.003        |
| Xpr1         | xenotropic and polytropic retrovirus receptor 1                                            | 0.335 | 0.016 | -0.103 | <b>0.515</b> | -0.005 | <b>0.467</b> |
| Olr1057      | olfactory receptor 1057                                                                    | 0.335 | 0.047 | 0.479  | 0.007        | 0.359  | 0.018        |
| Setx         | senataxin                                                                                  | 0.335 | 0.045 | 0.204  | <b>0.884</b> | 0.348  | 0.034        |
| Hsd17b2      | hydroxysteroid (17-beta) dehydrogenase 2                                                   | 0.335 | 0.041 | 0.023  | <b>0.427</b> | 0.081  | <b>0.157</b> |
| Clca2        | chloride channel calcium activated 2                                                       | 0.334 | 0.041 | 0.303  | <b>0.971</b> | 0.441  | 0.006        |
| RGD1565975   | RGD1565975                                                                                 | 0.334 | 0.030 | 0.195  | <b>0.800</b> | 0.044  | <b>0.345</b> |
| Hist2h3c     | histone cluster 2, H3c                                                                     | 0.333 | 0.023 | -0.106 | <b>0.593</b> | 0.090  | <b>0.503</b> |
| Rnf34        | ring finger protein 34                                                                     | 0.333 | 0.030 | 0.085  | <b>0.730</b> | 0.172  | <b>0.890</b> |
| LOC361914    | similar to solute carrier family 7 (cationic amino acid transporter, y+ system), member 12 | 0.333 | 0.046 | 0.494  | 0.007        | 0.575  | 0.001        |
| Ephb6        | Eph receptor B6                                                                            | 0.333 | 0.033 | -0.050 | <b>0.497</b> | -0.129 | <b>0.641</b> |
| Tnks         | tankyrase, TRF1-interacting ankyrin-related ADP-ribose polymerase                          | 0.333 | 0.050 | 0.230  | <b>0.942</b> | 0.257  | <b>0.924</b> |
| Cep57l1      | centrosomal protein 57-like 1                                                              | 0.332 | 0.034 | 0.042  | <b>0.577</b> | 0.192  | <b>0.912</b> |
| Pdzd8        | PDZ domain containing 8                                                                    | 0.332 | 0.031 | -0.074 | <b>0.419</b> | 0.094  | <b>0.465</b> |
| LOC499331    | similar to hypothetical protein D030056L22                                                 | 0.332 | 0.040 | 0.142  | <b>0.794</b> | -0.143 | <b>0.624</b> |
| Ctdspl       | CTD (carboxy-terminal domain, RNA polymerase II, polypeptide A) small phosphatase-like     | 0.332 | 0.047 | -0.051 | <b>0.707</b> | -0.051 | <b>0.747</b> |
| Stap1        | signal transducing adaptor family member 1                                                 | 0.332 | 0.048 | 0.117  | <b>0.125</b> | 0.295  | 0.033        |
| RGD1561819   | similar to Natural killer cell protease 1 precursor (RNKP1) (Granzyme B)                   | 0.332 | 0.021 | 0.842  | 0.000        | 0.496  | 0.002        |
| Ptpre        | protein tyrosine phosphatase, receptor type, E                                             | 0.331 | 0.047 | 0.305  | <b>0.809</b> | 0.359  | 0.029        |
| Cblb         | Cas-Br-M (murine) ecotropic retroviral transforming sequence b                             | 0.331 | 0.041 | 0.312  | <b>0.847</b> | 0.367  | 0.032        |
| Fmr1         | fragile X mental retardation 1                                                             | 0.331 | 0.033 | 0.313  | <b>0.845</b> | 0.111  | <b>0.699</b> |
| Clec14a      | C-type lectin domain family 14, member A                                                   | 0.330 | 0.025 | 0.210  | <b>0.637</b> | 0.042  | <b>0.498</b> |
| Slco2a1      | solute carrier organic anion transporter family, member 2a1                                | 0.329 | 0.049 | 0.085  | <b>0.693</b> | 0.049  | <b>0.540</b> |
| Accn2        | amiloride-sensitive cation channel 2, neuronal                                             | 0.328 | 0.019 | 0.193  | <b>0.810</b> | 0.109  | <b>0.775</b> |
| Marveld2     | MARVEL domain containing 2                                                                 | 0.328 | 0.043 | 0.013  | <b>0.551</b> | -0.026 | <b>0.526</b> |
| Pik3ca       | phosphoinositide-3-kinase, catalytic, alpha polypeptide                                    | 0.328 | 0.043 | 0.238  | <b>0.907</b> | 0.247  | <b>0.921</b> |
| Prg2         | proteoglycan 2, bone marrow                                                                | 0.328 | 0.000 | 0.484  | 0.001        | 0.276  | 0.003        |
| Add2         | adducin 2 (beta)                                                                           | 0.328 | 0.037 | 0.384  | 0.019        | 0.255  | <b>0.058</b> |
| Prorsd1      | prolyl-tRNA synthetase associated domain containing 1                                      | 0.327 | 0.029 | 0.145  | <b>0.733</b> | 0.320  | 0.016        |
| Adamts12     | ADAM metalloproteinase with thrombospondin type 1 motif, 12                                | 0.327 | 0.049 | 0.251  | <b>0.903</b> | 0.051  | <b>0.595</b> |
| Nr1d2        | nuclear receptor subfamily 1, group D, member 2                                            | 0.327 | 0.031 | 0.188  | <b>0.783</b> | 0.443  | 0.004        |
| Pld3         | phospholipase D family, member 3                                                           | 0.327 | 0.044 | 0.116  | <b>0.847</b> | 0.096  | <b>0.778</b> |
| LOC100125361 | zinc finger protein LOC100125361                                                           | 0.327 | 0.049 | -0.007 | <b>0.513</b> | 0.191  | <b>0.891</b> |
| Klb-ps1      | klotho beta, pseudogene 1                                                                  | 0.327 | 0.045 | 0.251  | <b>0.496</b> | 0.118  | <b>0.753</b> |
| Kdm6a        | lysine (K)-specific demethylase 6A                                                         | 0.326 | 0.040 | 0.087  | <b>0.707</b> | -0.019 | <b>0.472</b> |
| Cd300lg      | Cd300 molecule-like family member G                                                        | 0.326 | 0.040 | 0.395  | 0.020        | -0.113 | <b>0.397</b> |
| LOC689919    | similar to 40S ribosomal protein S26                                                       | 0.326 | 0.045 | -0.027 | <b>0.518</b> | -0.059 | <b>0.604</b> |
| Fam118b      | family with sequence similarity 118, member B                                              | 0.325 | 0.039 | 0.150  | <b>0.774</b> | 0.010  | <b>0.513</b> |
| Gna14        | guanine nucleotide binding protein, alpha 14                                               | 0.325 | 0.037 | 0.087  | <b>0.696</b> | 0.180  | <b>0.819</b> |
| Rars         | arginyl-tRNA synthetase                                                                    | 0.325 | 0.045 | 0.150  | <b>0.821</b> | 0.081  | <b>0.608</b> |
| Nlrp9        | NLR family, pyrin domain containing 9                                                      | 0.325 | 0.036 | 0.407  | 0.009        | 0.332  | 0.022        |
| Tln2         | talin 2                                                                                    | 0.324 | 0.046 | 0.073  | <b>0.477</b> | 0.030  | <b>0.628</b> |
| Arl5c        | ADP-ribosylation factor-like 5C                                                            | 0.324 | 0.020 | 0.580  | 0.005        | 0.767  | 0.003        |
| Efcab4b      | EF-hand calcium binding domain 4B                                                          | 0.324 | 0.046 | 0.136  | <b>0.792</b> | 0.226  | <b>0.900</b> |
| Fcgr2b       | Fc fragment of IgG, low affinity IIb, receptor (CD32)                                      | 0.324 | 0.033 | 0.293  | 0.042        | 0.582  | 0.015        |
| Cdc14a       | CDC14 cell division cycle 14 homolog A ( <i>S. cerevisiae</i> )                            | 0.323 | 0.019 | -0.125 | <b>0.495</b> | -0.014 | <b>0.410</b> |
| Ralbp1       | ralA binding protein 1                                                                     | 0.323 | 0.043 | 0.019  | <b>0.483</b> | 0.082  | <b>0.721</b> |
| Kcnd2        | potassium voltage-gated channel, Shal-related subfamily, member 2                          | 0.323 | 0.033 | 0.229  | <b>0.886</b> | 0.230  | <b>0.717</b> |

|            |                                                                                                 |       |       |        |              |        |              |
|------------|-------------------------------------------------------------------------------------------------|-------|-------|--------|--------------|--------|--------------|
| Gcom1      | GRINL1A complex locus 1                                                                         | 0.322 | 0.048 | -0.034 | <b>0.470</b> | -0.070 | <b>0.706</b> |
| Fbxo32     | F-box protein 32                                                                                | 0.322 | 0.034 | 0.404  | 0.008        | 0.683  | 0.000        |
| Mtmr4      | myotubularin related protein 4                                                                  | 0.322 | 0.048 | 0.293  | <b>0.987</b> | 0.403  | 0.010        |
| Prtfdc1    | phosphoribosyl transferase domain containing 1                                                  | 0.322 | 0.048 | 0.079  | <b>0.568</b> | 0.011  | <b>0.627</b> |
| Arhgap15   | Rho GTPase activating protein 15                                                                | 0.322 | 0.032 | 0.475  | 0.014        | 0.695  | 0.002        |
| RGD1561149 | similar to mKIAA1522 protein                                                                    | 0.322 | 0.028 | -0.089 | <b>0.481</b> | -0.166 | <b>0.641</b> |
| Hes1       | hairy and enhancer of split 1 (Drosophila)                                                      | 0.321 | 0.020 | -0.064 | 0.049        | -0.046 | <b>0.201</b> |
| Prrg4      | proline rich Gla (G-carboxyglutamic acid) 4 (transmembrane)                                     | 0.321 | 0.050 | 0.059  | <b>0.699</b> | 0.019  | <b>0.670</b> |
| Ifnar1     | interferon (alpha, beta and omega) receptor 1                                                   | 0.321 | 0.042 | 0.270  | <b>0.947</b> | 0.349  | 0.025        |
| Fcrlb      | Fc receptor-like B                                                                              | 0.321 | 0.029 | 0.353  | 0.023        | -0.008 | <b>0.430</b> |
| Atf6       | activating transcription factor 6                                                               | 0.320 | 0.015 | -0.111 | <b>0.316</b> | 0.006  | <b>0.370</b> |
| LOC691895  | similar to ferritin, heavy polypeptide-like 17                                                  | 0.320 | 0.045 | 0.283  | <b>0.973</b> | 0.295  | 0.044        |
| LOC685994  | similar to Spetex-2C protein                                                                    | 0.320 | 0.031 | 0.378  | 0.012        | 0.336  | 0.018        |
| Shpk       | sedoheptulokinase                                                                               | 0.320 | 0.040 | -0.020 | <b>0.507</b> | -0.169 | <b>0.804</b> |
| Nr1h4      | nuclear receptor subfamily 1, group H, member 4                                                 | 0.319 | 0.039 | 0.163  | <b>0.781</b> | 0.166  | <b>0.683</b> |
| Akna       | AT-hook transcription factor                                                                    | 0.318 | 0.048 | 0.695  | 0.009        | 0.869  | 0.003        |
| Agpat5     | 1-acylglycerol-3-phosphate O-acyltransferase 5 (lysophosphatidic acid acyltransferase, epsilon) | 0.318 | 0.032 | 0.154  | <b>0.764</b> | 0.478  | 0.003        |
| LOC690463  | hypothetical protein LOC690463                                                                  | 0.317 | 0.024 | 0.119  | <b>0.560</b> | 0.232  | 0.030        |
| Mboat2     | membrane bound O-acyltransferase domain containing 2                                            | 0.317 | 0.040 | -0.022 | <b>0.462</b> | 0.043  | <b>0.561</b> |
| Irf1       | interferon regulatory factor 1                                                                  | 0.317 | 0.049 | -0.082 | <b>0.666</b> | -0.063 | <b>0.692</b> |
| Krt80      | keratin 80                                                                                      | 0.317 | 0.044 | 0.059  | <b>0.647</b> | 0.246  | <b>0.923</b> |
| Sesn3      | sestrin 3                                                                                       | 0.316 | 0.047 | 0.263  | <b>0.586</b> | 0.255  | <b>0.874</b> |
| Stk4       | serine/threonine kinase 4                                                                       | 0.316 | 0.047 | 0.166  | <b>0.405</b> | 0.365  | 0.028        |
| Hist2h4    | histone cluster 2, H4                                                                           | 0.316 | 0.036 | -0.121 | <b>0.682</b> | 0.115  | <b>0.725</b> |
| Abcc1      | ATP-binding cassette, subfamily C (CFTR/MRP), member 1                                          | 0.316 | 0.019 | 0.343  | 0.020        | 0.356  | 0.014        |
| Whsc1      | Wolf-Hirschhorn syndrome candidate 1 (human)                                                    | 0.316 | 0.045 | 0.159  | <b>0.694</b> | 0.095  | <b>0.613</b> |
| Hnf1a      | HNF1 homeobox A                                                                                 | 0.316 | 0.030 | -0.037 | <b>0.383</b> | -0.132 | <b>0.561</b> |
| Ptprc      | protein tyrosine phosphatase, receptor type, C                                                  | 0.316 | 0.023 | 0.759  | 0.003        | 1.034  | 0.000        |
| LOC497934  | similar to hypothetical protein FLJ20014                                                        | 0.315 | 0.047 | -0.002 | <b>0.449</b> | -0.046 | <b>0.622</b> |
| Kdm1b      | lysine (K)-specific demethylase 1B                                                              | 0.315 | 0.034 | 0.161  | <b>0.554</b> | 0.249  | <b>0.054</b> |
| Hist2h4    | histone cluster 2, H4                                                                           | 0.313 | 0.028 | -0.031 | <b>0.349</b> | 0.008  | <b>0.355</b> |
| RT1-T24-1  | RT1 class I, locus T24, gene 1                                                                  | 0.313 | 0.045 | 0.118  | <b>0.470</b> | 0.143  | <b>0.818</b> |
| Upf2       | UPF2 regulator of nonsense transcripts homolog (yeast)                                          | 0.313 | 0.035 | 0.214  | <b>0.836</b> | 0.326  | 0.030        |
| Osbpl3     | oxysterol binding protein-like 3                                                                | 0.313 | 0.041 | -0.339 | 0.012        | -0.091 | <b>0.480</b> |
| Bard1      | BRCA1 associated RING domain 1                                                                  | 0.312 | 0.047 | 0.152  | <b>0.760</b> | -0.153 | <b>0.759</b> |
| RGD1309049 | similar to RIKEN cDNA 4933415F23                                                                | 0.312 | 0.043 | -0.060 | <b>0.415</b> | -0.223 | <b>0.836</b> |
| Iqcf2      | IQ motif containing F2                                                                          | 0.312 | 0.039 | 0.119  | <b>0.272</b> | 0.122  | <b>0.714</b> |
| S100a1     | S100 calcium binding protein A1                                                                 | 0.312 | 0.026 | 0.400  | 0.012        | 0.203  | <b>0.770</b> |
| Pola1      | polymerase (DNA directed), alpha 1                                                              | 0.311 | 0.044 | 0.210  | <b>0.921</b> | 0.000  | <b>0.471</b> |
| Epas1      | endothelial PAS domain protein 1                                                                | 0.309 | 0.004 | -0.122 | <b>0.115</b> | -0.111 | <b>0.118</b> |
| Abcd3      | ATP-binding cassette, subfamily D (ALD), member 3                                               | 0.307 | 0.039 | 0.044  | <b>0.409</b> | 0.112  | <b>0.489</b> |
| Cpa5       | carboxypeptidase A5                                                                             | 0.306 | 0.037 | 0.195  | <b>0.845</b> | 0.326  | 0.026        |
| RGD1562339 | RGD1562339                                                                                      | 0.305 | 0.026 | 0.064  | <b>0.621</b> | 0.120  | <b>0.659</b> |
| Jsrp1      | junctional sarcoplasmic reticulum protein 1                                                     | 0.305 | 0.011 | 0.662  | 0.005        | 0.984  | 0.001        |
| Psrc1      | proline/serine-rich coiled-coil 1                                                               | 0.304 | 0.048 | -0.034 | <b>0.646</b> | -0.055 | <b>0.627</b> |
| Shprh      | SNF2 histone linker PHD RING helicase                                                           | 0.303 | 0.029 | 0.388  | 0.008        | 0.282  | 0.035        |
| Gpr35      | G protein-coupled receptor 35                                                                   | 0.302 | 0.036 | -0.190 | <b>0.752</b> | -0.344 | <b>0.944</b> |
| Eya3       | eyes absent homolog 3 (Drosophila)                                                              | 0.302 | 0.049 | -0.017 | <b>0.397</b> | 0.083  | <b>0.609</b> |
| Ugt2a3     | UDP glucuronosyltransferase 2 family, polypeptide A3                                            | 0.301 | 0.049 | 0.375  | 0.021        | 0.162  | <b>0.783</b> |
| LOC499407  | LRRGT00097                                                                                      | 0.301 | 0.047 | 0.330  | 0.030        | 0.305  | 0.035        |
| Pla2g2f    | phospholipase A2, group IIF                                                                     | 0.300 | 0.046 | -0.016 | <b>0.232</b> | -0.003 | <b>0.225</b> |
| Cnr2       | cannabinoid receptor 2 (macrophage)                                                             | 0.299 | 0.007 | 0.372  | 0.008        | 0.588  | 0.005        |
| Fmr1       | fragile X mental retardation 1                                                                  | 0.299 | 0.038 | 0.155  | <b>0.545</b> | 0.183  | <b>0.686</b> |
| Hk2        | hexokinase 2                                                                                    | 0.299 | 0.048 | 0.318  | 0.028        | 0.644  | 0.001        |
| Spsb4      | splA/ryanodine receptor domain and SOCS box containing 4                                        | 0.299 | 0.044 | -0.233 | <b>0.706</b> | -0.299 | <b>0.925</b> |
| Ripk1      | receptor (TNFRSF)-interacting serine-threonine kinase 1                                         | 0.298 | 0.035 | -0.010 | <b>0.497</b> | 0.043  | <b>0.541</b> |
| RGD1311558 | similar to 4930506M07Rik protein                                                                | 0.298 | 0.035 | 0.060  | <b>0.416</b> | -0.093 | <b>0.340</b> |
| Alkbh4     | alkB, alkylation repair homolog 4 (E. coli)                                                     | 0.297 | 0.044 | -0.111 | <b>0.611</b> | -0.289 | <b>0.902</b> |

|              |                                                                                                                  |       |       |        |              |        |              |
|--------------|------------------------------------------------------------------------------------------------------------------|-------|-------|--------|--------------|--------|--------------|
| LOC688708    | similar to ATP-binding cassette, sub-family C (CFTR/MRP), member 1                                               | 0.296 | 0.028 | 0.292  | 0.033        | 0.329  | 0.020        |
| RGD1561065   | similar to mKIAA1111 protein                                                                                     | 0.296 | 0.035 | 0.176  | <b>0.369</b> | 0.306  | 0.018        |
| Taf15        | TAF15 RNA polymerase II, TATA box binding protein (TBP)-associated factor                                        | 0.296 | 0.031 | 0.126  | <b>0.668</b> | 0.177  | <b>0.711</b> |
| Hmg111       | high-mobility group (nonhistone chromosomal) protein 1-like 1                                                    | 0.295 | 0.047 | 0.188  | <b>0.396</b> | 0.041  | <b>0.579</b> |
| Slc6a8       | solute carrier family 6 (neurotransmitter transporter, creatine), member 8                                       | 0.294 | 0.037 | 0.045  | <b>0.490</b> | -0.051 | <b>0.380</b> |
| LOC688276    | similar to epidermodysplasia verruciformis 2                                                                     | 0.294 | 0.016 | 0.694  | 0.003        | 0.835  | 0.001        |
| March3       | membrane-associated ring finger (C3HC4) 3                                                                        | 0.294 | 0.017 | 0.144  | 0.048        | 0.302  | 0.013        |
| Sor11        | sortilin-related receptor, LDLR class A repeats-containing                                                       | 0.293 | 0.017 | 0.397  | 0.017        | 0.372  | 0.019        |
| Irf2bpl      | interferon regulatory factor 2 binding protein-like                                                              | 0.293 | 0.034 | 0.037  | <b>0.500</b> | -0.073 | <b>0.466</b> |
| Ifi203-ps1   | interferon activated gene 203, pseudogene 1                                                                      | 0.293 | 0.003 | 0.010  | 0.005        | 0.432  | 0.002        |
| Ganc         | glucosidase, alpha; neutral C                                                                                    | 0.292 | 0.033 | -0.020 | <b>0.332</b> | 0.048  | <b>0.307</b> |
| Plekha5      | pleckstrin homology domain containing, family A member 5                                                         | 0.292 | 0.049 | 0.074  | <b>0.592</b> | 0.100  | <b>0.718</b> |
| Sema4c       | sema domain, immunoglobulin domain (Ig), transmembrane domain (TM) and short cytoplasmic domain, (semaphorin) 4C | 0.291 | 0.036 | 0.415  | 0.008        | 0.374  | 0.011        |
| LOC100364624 | hypothetical protein LOC100364624                                                                                | 0.291 | 0.029 | -0.086 | <b>0.188</b> | -0.268 | 0.028        |
| Mical1       | microtubule associated monooxygenase, calponin and LIM domain containing 1                                       | 0.290 | 0.038 | 0.027  | <b>0.506</b> | -0.019 | <b>0.382</b> |
| Ppargc1a     | peroxisome proliferator-activated receptor gamma, coactivator 1 alpha                                            | 0.289 | 0.028 | -0.032 | <b>0.221</b> | 0.362  | 0.009        |
| Scara5       | scavenger receptor class A, member 5 (putative)                                                                  | 0.289 | 0.046 | 0.208  | <b>0.831</b> | 0.110  | <b>0.709</b> |
| Cys1         | cystin 1                                                                                                         | 0.289 | 0.049 | 0.244  | <b>0.914</b> | 0.085  | <b>0.609</b> |
| Magebl1      | melanoma antigen, family B-like 1                                                                                | 0.288 | 0.033 | -0.098 | <b>0.419</b> | -0.134 | <b>0.328</b> |
| Ptprcap      | protein tyrosine phosphatase, receptor type, C-associated protein                                                | 0.287 | 0.007 | 0.566  | 0.005        | 0.827  | 0.000        |
| Cd79a        | Cd79a molecule, immunoglobulin-associated alpha                                                                  | 0.287 | 0.017 | 0.458  | 0.008        | 0.613  | 0.004        |
| Tpo          | thyroid peroxidase                                                                                               | 0.287 | 0.033 | 0.036  | <b>0.403</b> | -0.332 | <b>0.815</b> |
| Tnks2        | tankyrase, TRF1-interacting ankyrin-related ADP-ribose polymerase 2                                              | 0.286 | 0.041 | 0.045  | <b>0.511</b> | 0.074  | <b>0.538</b> |
| Cd300lg      | Cd300 molecule-like family member G                                                                              | 0.285 | 0.035 | 0.135  | <b>0.671</b> | -0.505 | 0.001        |
| Grem2        | gremlin 2                                                                                                        | 0.282 | 0.042 | 0.563  | 0.002        | 0.137  | <b>0.785</b> |
| Rasal3       | RAS protein activator like 3                                                                                     | 0.282 | 0.042 | 0.583  | 0.006        | 0.743  | 0.002        |
| Arhgdib      | Rho, GDP dissociation inhibitor (GDI) beta                                                                       | 0.282 | 0.046 | 0.518  | 0.007        | 0.563  | 0.002        |
| LOC296778    | similar to Integrin alpha-6 precursor (VLA-6) (CD49f antigen)                                                    | 0.281 | 0.012 | -0.484 | 0.004        | -0.732 | 0.000        |
| Cd5          | Cd5 molecule                                                                                                     | 0.281 | 0.043 | 0.415  | 0.050        | 0.713  | 0.009        |
| Gpr18        | G protein-coupled receptor 18                                                                                    | 0.281 | 0.005 | 0.537  | 0.002        | 0.759  | 0.000        |
| LOC689656    | hypothetical protein LOC689656                                                                                   | 0.281 | 0.024 | 0.052  | <b>0.104</b> | -0.100 | <b>0.227</b> |
| Lamc1        | laminin, gamma 1                                                                                                 | 0.280 | 0.039 | 0.252  | <b>0.574</b> | 0.161  | <b>0.717</b> |
| Etnk1        | ethanolamine kinase 1                                                                                            | 0.278 | 0.022 | 0.025  | <b>0.105</b> | 0.068  | <b>0.069</b> |
| Fbxw8        | F-box and WD repeat domain containing 8                                                                          | 0.278 | 0.047 | 0.018  | <b>0.453</b> | -0.007 | <b>0.397</b> |
| Ssh2         | slingshot homolog 2 (Drosophila)                                                                                 | 0.278 | 0.046 | 0.013  | <b>0.268</b> | 0.083  | <b>0.517</b> |
| RGD1559622   | similar to hypothetical protein C130079G13                                                                       | 0.277 | 0.028 | 0.425  | 0.005        | 0.334  | 0.010        |
| LOC683844    | similar to RING finger protein 11 (NEDD4 WW domain-binding protein 2) (Sid 1669)                                 | 0.275 | 0.044 | 0.000  | <b>0.179</b> | -0.485 | 0.003        |
| Kcnh3        | potassium voltage-gated channel, subfamily H (eag-related), member 3                                             | 0.274 | 0.035 | 0.381  | 0.013        | 0.159  | <b>0.683</b> |
| Jak3         | Janus kinase 3                                                                                                   | 0.274 | 0.019 | 0.597  | 0.004        | 0.575  | 0.003        |
| Tbc1d5       | TBC1 domain family, member 5                                                                                     | 0.274 | 0.030 | -0.020 | <b>0.422</b> | 0.064  | <b>0.480</b> |
| Inpp4a       | inositol polyphosphate-4-phosphatase, type 1                                                                     | 0.273 | 0.049 | 0.199  | <b>0.852</b> | 0.155  | <b>0.799</b> |
| Med14        | mediator complex subunit 14                                                                                      | 0.273 | 0.031 | -0.019 | <b>0.246</b> | 0.093  | <b>0.354</b> |
| Ins1         | insulin 1                                                                                                        | 0.273 | 0.027 | 0.427  | 0.004        | 0.458  | 0.003        |
| Atp13a3      | ATPase type 13A3                                                                                                 | 0.273 | 0.030 | 0.037  | <b>0.153</b> | -0.027 | <b>0.274</b> |
| RGD1310935   | similar to Dermal papilla derived protein 7                                                                      | 0.271 | 0.016 | 0.332  | 0.012        | 0.484  | 0.003        |
| Tgfb2        | transforming growth factor, beta receptor II                                                                     | 0.271 | 0.044 | 0.146  | <b>0.749</b> | 0.174  | <b>0.757</b> |
| Pvrl4        | poliovirus receptor-related 4                                                                                    | 0.270 | 0.024 | 0.088  | <b>0.447</b> | -0.145 | <b>0.418</b> |
| Etv4         | ets variant 4                                                                                                    | 0.269 | 0.038 | 0.014  | <b>0.353</b> | 0.018  | <b>0.539</b> |
| Ghr          | growth hormone receptor                                                                                          | 0.269 | 0.035 | 0.085  | <b>0.183</b> | 0.181  | <b>0.638</b> |
| RGD1562552   | similar to hypothetical protein LOC340061                                                                        | 0.269 | 0.026 | 0.458  | 0.012        | 0.485  | 0.008        |
| Coro1a       | coronin, actin binding protein 1A                                                                                | 0.268 | 0.041 | 0.632  | 0.003        | 0.749  | 0.000        |

|              |                                                                                              |       |       |        |              |        |              |
|--------------|----------------------------------------------------------------------------------------------|-------|-------|--------|--------------|--------|--------------|
| Wdr91        | WD repeat domain 91                                                                          | 0.268 | 0.039 | 0.021  | <b>0.339</b> | 0.177  | <b>0.068</b> |
| Il22ra2      | interleukin 22 receptor, alpha 2                                                             | 0.268 | 0.013 | 0.702  | 0.000        | 0.520  | 0.004        |
| LOC690347    | hypothetical protein LOC690347                                                               | 0.267 | 0.032 | 0.145  | <b>0.646</b> | -0.192 | <b>0.539</b> |
| RGD1310427   | similar to KIAA0090 protein                                                                  | 0.267 | 0.039 | 0.018  | <b>0.063</b> | -0.014 | <b>0.087</b> |
| Col4a5       | collagen, type IV, alpha 5                                                                   | 0.266 | 0.046 | 0.474  | 0.009        | 0.218  | <b>0.881</b> |
| Sgsm1        | small G protein signaling modulator 1                                                        | 0.266 | 0.048 | 0.680  | 0.002        | 0.719  | 0.000        |
| Arl4c-ps1    | ADP-ribosylation factor-like 4C, pseudogene 1                                                | 0.263 | 0.033 | 0.342  | 0.016        | 0.325  | 0.039        |
| Scara5       | scavenger receptor class A, member 5 (putative)                                              | 0.261 | 0.035 | 0.170  | <b>0.704</b> | 0.001  | <b>0.185</b> |
| Pnpo         | pyridoxine 5'-phosphate oxidase                                                              | 0.260 | 0.038 | 0.374  | 0.008        | 0.330  | 0.014        |
| Limd2        | LIM domain containing 2                                                                      | 0.258 | 0.011 | 0.608  | 0.002        | 0.456  | 0.001        |
| Zap70        | zeta-chain (TCR) associated protein kinase                                                   | 0.258 | 0.048 | 0.599  | 0.011        | 0.718  | 0.006        |
| Prkd3        | protein kinase D3                                                                            | 0.256 | 0.030 | 0.041  | <b>0.371</b> | 0.221  | 0.028        |
| Dusp15       | dual specificity phosphatase 15                                                              | 0.255 | 0.043 | 0.364  | 0.017        | 0.102  | <b>0.486</b> |
| Il7r         | interleukin 7 receptor                                                                       | 0.254 | 0.028 | 0.206  | 0.017        | 0.484  | 0.007        |
| RGD1564400   | similar to Eukaryotic translation initiation factor 5 (eIF-5)                                | 0.253 | 0.045 | 0.502  | 0.002        | -0.016 | <b>0.417</b> |
| Evc2         | Ellis van Creveld syndrome 2 homolog (human)                                                 | 0.252 | 0.042 | -0.145 | <b>0.487</b> | -0.069 | <b>0.273</b> |
| LOC681167    | hypothetical protein LOC681167                                                               | 0.250 | 0.037 | 0.138  | <b>0.596</b> | 0.279  | 0.021        |
| Pam          | peptidylglycine alpha-amidating monooxygenase                                                | 0.249 | 0.042 | 0.200  | <b>0.698</b> | 0.244  | 0.035        |
| LOC691259    | hypothetical protein LOC691259                                                               | 0.249 | 0.039 | 0.097  | <b>0.302</b> | 0.084  | <b>0.090</b> |
| Pigz         | phosphatidylinositol glycan anchor biosynthesis, class Z                                     | 0.248 | 0.041 | -0.099 | <b>0.084</b> | -0.169 | <b>0.059</b> |
| RGD1565591   | similar to Ski protein                                                                       | 0.247 | 0.025 | 0.100  | <b>0.598</b> | 0.092  | <b>0.520</b> |
| Lrmp         | lymphoid-restricted membrane protein                                                         | 0.246 | 0.035 | 0.506  | 0.005        | 0.425  | 0.017        |
| Far2         | fatty acyl CoA reductase 2                                                                   | 0.246 | 0.033 | 0.755  | 0.000        | 0.722  | 0.000        |
| LOC500700    | similar to chromosome 14 open reading frame 145                                              | 0.246 | 0.046 | 0.175  | <b>0.609</b> | -0.002 | <b>0.234</b> |
| LOC298138    | similar to RAS and EF hand domain containing                                                 | 0.246 | 0.033 | 0.385  | 0.008        | 0.147  | <b>0.053</b> |
| Cd8a         | CD8a molecule                                                                                | 0.245 | 0.034 | 0.348  | 0.030        | 0.499  | 0.016        |
| Tnf          | tumor necrosis factor                                                                        | 0.245 | 0.035 | 0.385  | 0.010        | 0.530  | 0.003        |
| Hist1h4b     | histone cluster 1, H4b                                                                       | 0.245 | 0.048 | -0.143 | <b>0.634</b> | 0.109  | <b>0.656</b> |
| Sep-01       | septin 1                                                                                     | 0.244 | 0.038 | 0.434  | 0.012        | 0.694  | 0.003        |
| Adamts9      | a disintegrin-like and metalloprotease (reprolysin type) with thrombospondin type 1 motif, 9 | 0.244 | 0.046 | 0.398  | 0.008        | 0.118  | <b>0.064</b> |
| Gpr18        | G protein-coupled receptor 18                                                                | 0.243 | 0.010 | 0.457  | 0.005        | 0.611  | 0.002        |
| Slamf6       | SLAM family member 6                                                                         | 0.242 | 0.015 | 0.028  | 0.045        | 0.563  | 0.002        |
| Hist2h3c2    | histone cluster 2, H3c2                                                                      | 0.242 | 0.047 | 0.016  | <b>0.475</b> | 0.000  | <b>0.427</b> |
| Cd19         | CD19 molecule                                                                                | 0.242 | 0.001 | 0.726  | 0.000        | 0.852  | 0.000        |
| Ccng2        | cyclin G2                                                                                    | 0.241 | 0.021 | -0.042 | <b>0.371</b> | 0.100  | <b>0.054</b> |
| Tcrb         | T-cell receptor beta chain                                                                   | 0.239 | 0.038 | 0.316  | 0.025        | 0.309  | 0.029        |
| Ahnak        | AHNAK nucleoprotein                                                                          | 0.239 | 0.028 | 0.012  | <b>0.348</b> | -0.022 | <b>0.316</b> |
| Btla         | B and T lymphocyte associated                                                                | 0.237 | 0.009 | 0.469  | 0.010        | 0.751  | 0.002        |
| Prap1        | proline-rich acidic protein 1                                                                | 0.237 | 0.049 | 0.032  | <b>0.064</b> | 0.007  | <b>0.054</b> |
| Ankle2       | ankyrin repeat and LEM domain containing 2                                                   | 0.235 | 0.048 | 0.181  | <b>0.745</b> | 0.335  | 0.012        |
| Rep15        | RAB15 effector protein                                                                       | 0.233 | 0.040 | -0.198 | <b>0.430</b> | -0.064 | <b>0.226</b> |
| Sin3a        | SIN3 homolog A, transcription regulator (yeast)                                              | 0.233 | 0.028 | 0.035  | <b>0.085</b> | 0.038  | <b>0.080</b> |
| Lrrc48       | leucine rich repeat containing 48                                                            | 0.232 | 0.032 | -0.232 | <b>0.499</b> | -0.195 | 0.029        |
| Ccdc169      | coiled-coil domain containing 169                                                            | 0.231 | 0.045 | -0.018 | <b>0.270</b> | -0.167 | <b>0.554</b> |
| Btla         | B and T lymphocyte associated                                                                | 0.229 | 0.026 | 0.201  | 0.039        | 0.499  | 0.012        |
| Col6a3       | procollagen, type VI, alpha 3                                                                | 0.229 | 0.040 | 0.191  | <b>0.592</b> | 0.103  | <b>0.088</b> |
| Znrf4        | zinc and ring finger 4                                                                       | 0.226 | 0.037 | -0.223 | <b>0.493</b> | 0.019  | <b>0.377</b> |
| Cdh23        | cadherin-related 23                                                                          | 0.225 | 0.048 | 0.116  | <b>0.511</b> | -0.206 | <b>0.540</b> |
| Olr1570      | olfactory receptor 1570                                                                      | 0.224 | 0.021 | -0.267 | 0.037        | -0.680 | 0.002        |
| Gpr68        | G protein-coupled receptor 68                                                                | 0.223 | 0.018 | 0.413  | 0.016        | 0.679  | 0.006        |
| Olr415       | olfactory receptor 415                                                                       | 0.220 | 0.040 | -0.164 | <b>0.473</b> | -0.354 | <b>0.839</b> |
| Stmn2        | stathmin-like 2                                                                              | 0.220 | 0.046 | 0.136  | <b>0.688</b> | 0.150  | <b>0.665</b> |
| Il16         | interleukin 16                                                                               | 0.219 | 0.021 | 0.448  | 0.009        | 0.523  | 0.001        |
| Olr390       | olfactory receptor 390                                                                       | 0.218 | 0.036 | 0.389  | 0.015        | 0.550  | 0.004        |
| Fam168a      | family with sequence similarity 168, member A                                                | 0.218 | 0.038 | 0.239  | 0.028        | 0.402  | 0.005        |
| Cd37         | CD37 molecule                                                                                | 0.218 | 0.040 | 0.366  | 0.039        | 0.542  | 0.014        |
| RGD1306739   | similar to RIKEN cDNA 1700040L02                                                             | 0.217 | 0.046 | 0.063  | <b>0.285</b> | 0.230  | <b>0.157</b> |
| LOC100364854 | similar to RIKEN cDNA A430107P09 gene-like                                                   | 0.217 | 0.031 | 0.326  | <b>0.075</b> | 0.535  | 0.018        |
| Slnf5        | schlafen family member 5                                                                     | 0.215 | 0.009 | -0.088 | <b>0.271</b> | -0.022 | <b>0.086</b> |
| Abcg1        | ATP-binding cassette, subfamily G (WHITE), member 1                                          | 0.211 | 0.032 | 0.372  | 0.010        | 0.107  | <b>0.108</b> |
| Cxcr4        | chemokine (C-X-C motif) receptor 4                                                           | 0.210 | 0.027 | 0.491  | 0.014        | 0.464  | 0.004        |
| Cyp4f5       | cytochrome P450, family 4, subfamily f, polypeptide 5                                        | 0.210 | 0.034 | 0.187  | 0.034        | -0.107 | <b>0.362</b> |

|            |                                                              |       |       |        |              |        |              |
|------------|--------------------------------------------------------------|-------|-------|--------|--------------|--------|--------------|
| Rcan3      | RCAN family member 3                                         | 0.208 | 0.021 | -0.424 | <b>0.622</b> | -0.171 | <b>0.202</b> |
| Chi3l1     | chitinase 3-like 1                                           | 0.208 | 0.044 | 0.841  | 0.002        | 0.662  | 0.002        |
| Esyt3      | extended synaptotagmin-like protein 3                        | 0.208 | 0.026 | -0.129 | <b>0.257</b> | -0.212 | <b>0.415</b> |
| Cybas3     | cytochrome b, ascorbate dependent 3                          | 0.206 | 0.017 | 0.163  | <b>0.065</b> | 0.300  | 0.027        |
| Mfng       | MFNG O-fucosylpeptide 3-beta-N-acetylglucosaminyltransferase | 0.204 | 0.023 | 0.220  | 0.041        | 0.249  | 0.028        |
| Spn        | sialophorin                                                  | 0.204 | 0.023 | 0.203  | <b>0.094</b> | 0.660  | 0.008        |
| Ing3       | inhibitor of growth family, member 3                         | 0.202 | 0.042 | 0.336  | 0.010        | 0.338  | 0.008        |
| Slc39a2    | solute carrier family 39 (zinc transporter), member 2        | 0.202 | 0.041 | 0.252  | 0.027        | -0.022 | <b>0.194</b> |
| Itk        | IL2-inducible T-cell kinase                                  | 0.201 | 0.036 | 0.345  | 0.015        | 0.656  | 0.004        |
| Epha1      | Eph receptor A1                                              | 0.199 | 0.046 | -0.060 | <b>0.194</b> | -0.022 | <b>0.158</b> |
| Megf8      | multiple EGF-like-domains 8                                  | 0.198 | 0.050 | -0.231 | <b>0.536</b> | -0.533 | 0.007        |
| Acsf3      | acyl-CoA synthetase family member 3                          | 0.196 | 0.012 | 0.170  | 0.012        | -0.032 | 0.030        |
| Tulp1      | tubby like protein 1                                         | 0.195 | 0.041 | -0.069 | <b>0.199</b> | 0.107  | <b>0.057</b> |
| Gpr174     | G protein-coupled receptor 174                               | 0.193 | 0.021 | 0.159  | 0.029        | 0.337  | 0.010        |
| Abcg2      | ATP-binding cassette, subfamily G (WHITE), member 2          | 0.192 | 0.014 | 0.141  | 0.013        | 0.163  | 0.013        |
| Olr1337    | olfactory receptor 1337                                      | 0.190 | 0.040 | -0.183 | <b>0.330</b> | -0.337 | <b>0.627</b> |
| Sell       | selectin L                                                   | 0.186 | 0.010 | -0.052 | 0.020        | 0.358  | 0.006        |
| Pou2af1    | POU class 2 associating factor 1                             | 0.184 | 0.023 | 0.076  | <b>0.065</b> | 0.455  | 0.005        |
| LOC691952  | hypothetical protein LOC691952                               | 0.181 | 0.005 | -0.279 | <b>0.082</b> | -0.760 | 0.008        |
| Zc3h11a    | zinc finger CCCH-type containing 11A                         | 0.180 | 0.030 | 0.334  | 0.015        | 0.426  | 0.005        |
| Gast       | gastrin                                                      | 0.180 | 0.047 | 0.341  | 0.027        | 0.177  | 0.046        |
| Skil       | SKI-like oncogene                                            | 0.177 | 0.043 | -0.051 | <b>0.312</b> | 0.079  | <b>0.084</b> |
| Acsm3      | acyl-CoA synthetase medium-chain family member 3             | 0.168 | 0.008 | -0.179 | 0.045        | 0.758  | 0.000        |
| Lphn2      | latrophilin 2                                                | 0.164 | 0.031 | 0.170  | 0.026        | -0.149 | <b>0.169</b> |
| Faim3      | Fas apoptotic inhibitory molecule 3                          | 0.163 | 0.012 | 0.581  | 0.005        | 0.563  | 0.005        |
| Ncor1      | nuclear receptor co-repressor 1                              | 0.162 | 0.013 | -0.041 | <b>0.068</b> | 0.197  | 0.007        |
| Tbc1d10c   | TBC1 domain family, member 10C                               | 0.162 | 0.022 | 0.585  | 0.003        | 0.550  | 0.002        |
| Vwc2l      | von Willebrand factor C domain-containing protein 2-like     | 0.161 | 0.022 | -0.177 | <b>0.238</b> | -0.264 | <b>0.346</b> |
| Cd3e       | CD3 molecule, epsilon                                        | 0.160 | 0.022 | 0.062  | <b>0.093</b> | 0.394  | 0.012        |
| Zfp608     | zinc finger protein 608                                      | 0.160 | 0.033 | -0.177 | <b>0.239</b> | -0.229 | <b>0.277</b> |
| Retn       | resistin                                                     | 0.159 | 0.014 | 0.765  | 0.000        | -0.125 | 0.020        |
| Sertad3    | SERTA domain containing 3                                    | 0.158 | 0.039 | -0.244 | <b>0.056</b> | -0.383 | <b>0.675</b> |
| LOC680810  | hypothetical protein LOC680810                               | 0.157 | 0.033 | -0.202 | <b>0.064</b> | -0.296 | 0.030        |
| Bank1      | B-cell scaffold protein with ankyrin repeats 1               | 0.153 | 0.001 | 0.127  | 0.002        | 0.549  | 0.001        |
| Fcrla      | Fc receptor-like A                                           | 0.149 | 0.011 | 0.821  | 0.003        | 0.711  | 0.002        |
| Myo1g      | myosin IG                                                    | 0.147 | 0.046 | 0.501  | 0.006        | 0.564  | 0.007        |
| Pou2af1    | POU class 2 associating factor 1                             | 0.147 | 0.026 | 0.212  | 0.013        | 0.575  | 0.001        |
| Map4k1     | mitogen activated protein kinase kinase kinase kinase 1      | 0.145 | 0.036 | 0.430  | 0.029        | 0.585  | 0.011        |
| Pabpc2     | poly(A) binding protein, cytoplasmic 2                       | 0.142 | 0.030 | -0.206 | <b>0.205</b> | -0.500 | 0.024        |
| RGD1561381 | similar to microsomal glutathione S-transferase 3            | 0.140 | 0.040 | -0.016 | <b>0.052</b> | -0.117 | 0.030        |
| Adh6a      | alcohol dehydrogenase 6A (class V)                           | 0.139 | 0.021 | 0.197  | 0.041        | 0.141  | <b>0.683</b> |
| RT1-DOb    | RT1 class II, locus DOb                                      | 0.134 | 0.036 | 0.555  | 0.007        | 0.763  | 0.001        |
| Actn3      | actinin alpha 3                                              | 0.130 | 0.027 | 0.191  | 0.024        | 0.251  | <b>0.058</b> |
| Fcrla      | Fc receptor-like A                                           | 0.128 | 0.001 | 0.881  | 0.001        | 0.467  | 0.001        |
| Sbk1       | SH3-binding domain kinase 1                                  | 0.128 | 0.023 | 0.033  | 0.040        | 0.165  | 0.035        |
| Siglec10   | sialic acid binding Ig-like lectin 10                        | 0.126 | 0.003 | 0.844  | 0.001        | 0.818  | 0.001        |
| Mfge8      | milk fat globule-EGF factor 8 protein                        | 0.124 | 0.015 | 0.270  | 0.016        | 0.162  | 0.014        |
| Madcam1    | mucosal vascular addressin cell adhesion molecule 1          | 0.118 | 0.027 | 0.359  | 0.017        | 0.454  | 0.023        |
| Fam46b     | family with sequence similarity 46, member B                 | 0.116 | 0.030 | 0.122  | 0.028        | -0.248 | <b>0.336</b> |
| Usp6nl     | USP6 N-terminal like                                         | 0.113 | 0.046 | -0.220 | <b>0.355</b> | -0.044 | <b>0.132</b> |
| Lcp1       | lymphocyte cytosolic protein 1                               | 0.105 | 0.039 | 0.327  | 0.035        | 0.584  | 0.006        |
| Ppm1l      | protein phosphatase, Mg2+/Mn2+ dependent, 1L                 | 0.094 | 0.037 | 0.175  | 0.011        | 0.173  | 0.011        |
| Sipa1      | signal-induced proliferation-associated 1                    | 0.093 | 0.037 | 0.351  | 0.011        | 0.397  | 0.012        |
| Ahnak      | AHNAK nucleoprotein                                          | 0.090 | 0.005 | -0.097 | 0.026        | -0.014 | 0.013        |
| Itsn2      | intersectin 2                                                | 0.078 | 0.023 | 0.514  | 0.002        | 0.483  | 0.003        |
| Il13ra1    | interleukin 13 receptor, alpha 1                             | 0.075 | 0.046 | -0.191 | <b>0.313</b> | 0.116  | 0.017        |
| Clca4      | chloride channel accessory 4                                 | 0.067 | 0.015 | 0.127  | 0.033        | 0.867  | 0.000        |
| S100g      | S100 calcium binding protein G                               | 0.066 | 0.024 | 1.050  | 0.000        | -0.213 | 0.006        |
| Arpp21     | cAMP-regulated phosphoprotein 21                             | 0.063 | 0.025 | 0.383  | <b>0.058</b> | 0.719  | 0.005        |
| Rnf126     | ring finger protein 126                                      | 0.055 | 0.037 | -0.178 | 0.032        | -0.162 | 0.033        |

|              |                                                                                               |        |       |        |              |        |              |
|--------------|-----------------------------------------------------------------------------------------------|--------|-------|--------|--------------|--------|--------------|
| LOC691047    | similar to RIKEN cDNA 1700001F22                                                              | 0.055  | 0.046 | -0.509 | 0.043        | -0.705 | 0.019        |
| Otud7b       | OTU domain containing 7B                                                                      | 0.051  | 0.039 | 0.286  | 0.007        | 0.489  | 0.001        |
| Snx20        | sorting nexin 20                                                                              | 0.045  | 0.029 | 0.528  | 0.004        | 0.516  | 0.001        |
| V1rf4        | vomeronal 1 receptor F4                                                                       | 0.045  | 0.023 | -0.320 | <b>0.091</b> | -0.587 | 0.029        |
| Ptprc        | protein tyrosine phosphatase, receptor type, C                                                | 0.035  | 0.040 | 0.648  | 0.003        | 0.768  | 0.000        |
| Lima1        | LIM domain and actin binding 1                                                                | 0.018  | 0.036 | -0.128 | <b>0.078</b> | 0.192  | 0.003        |
| Ncf1         | neutrophil cytosolic factor 1                                                                 | 0.009  | 0.028 | 0.448  | 0.022        | 0.549  | 0.010        |
| Ccr6         | chemokine (C-C motif) receptor 6                                                              | -0.004 | 0.010 | 0.087  | 0.006        | 0.213  | 0.003        |
| B4galnt1     | beta-1,4-N-acetyl-galactosaminyl transferase 1                                                | -0.014 | 0.016 | 0.333  | 0.027        | 0.580  | 0.007        |
| Clvs1        | clavesin 1                                                                                    | -0.017 | 0.040 | -0.654 | 0.005        | -0.446 | <b>0.736</b> |
| Lcn2         | lipocalin 2                                                                                   | -0.028 | 0.029 | 0.004  | 0.007        | -0.387 | 0.001        |
| Wfdc16       | WAP four-disulfide core domain 16                                                             | -0.036 | 0.024 | -0.399 | 0.037        | -0.923 | 0.000        |
| LOC499544    | LRRGT00154                                                                                    | -0.039 | 0.024 | -0.419 | <b>0.257</b> | -0.682 | 0.008        |
| Gal3st2      | galactose-3-O-sulfotransferase 2                                                              | -0.042 | 0.035 | 0.032  | 0.030        | 0.114  | 0.018        |
| Hmha1        | histocompatibility (minor) HA-1                                                               | -0.044 | 0.018 | 0.315  | 0.008        | 0.482  | 0.001        |
| Ghrl         | ghrelin/obestatin prepropeptide                                                               | -0.052 | 0.015 | -0.870 | 0.000        | -0.352 | 0.001        |
| Reep6        | receptor accessory protein 6                                                                  | -0.052 | 0.039 | 0.092  | <b>0.285</b> | -0.158 | <b>0.844</b> |
| Cd6          | Cd6 molecule                                                                                  | -0.056 | 0.003 | 0.343  | 0.025        | 0.549  | 0.002        |
| LOC363326    | hypothetical LOC363326                                                                        | -0.056 | 0.023 | 0.560  | 0.007        | 0.548  | 0.004        |
| Cd69         | Cd69 molecule                                                                                 | -0.058 | 0.008 | 0.172  | <b>0.073</b> | 0.263  | <b>0.067</b> |
| Cd40         | CD40 molecule, TNF receptor superfamily member 5                                              | -0.059 | 0.038 | 0.381  | 0.006        | 0.452  | 0.003        |
| St3gal6      | ST3 beta-galactoside alpha-2,3-sialyltransferase 6                                            | -0.063 | 0.036 | 0.229  | <b>0.162</b> | 0.344  | <b>0.584</b> |
| Fibin        | fin bud initiation factor homolog (zebrafish)                                                 | -0.064 | 0.009 | 0.116  | <b>0.659</b> | 0.019  | <b>0.340</b> |
| LOC100364769 | LRRG00136-like                                                                                | -0.080 | 0.024 | -0.977 | 0.000        | -0.958 | 0.001        |
| Hspa1b       | heat shock 70kD protein 1B (mapped)                                                           | -0.081 | 0.018 | 0.118  | 0.003        | -0.428 | 0.034        |
| LOC308990    | hypothetical protein LOC308990                                                                | -0.087 | 0.022 | 0.403  | 0.020        | 0.542  | 0.004        |
| Podn1        | podocan-like 1                                                                                | -0.101 | 0.041 | 0.171  | <b>0.075</b> | 0.327  | 0.017        |
| Ostalpha     | organic solute transporter alpha                                                              | -0.110 | 0.045 | -0.598 | 0.001        | -0.903 | 0.000        |
| Cd40         | CD40 molecule, TNF receptor superfamily member 5                                              | -0.112 | 0.032 | 0.214  | 0.025        | 0.426  | 0.008        |
| Itga5        | integrin, alpha 5 (fibronectin receptor, alpha polypeptide)                                   | -0.118 | 0.034 | -0.033 | <b>0.294</b> | -0.481 | 0.007        |
| Cartpt       | CART prepropeptide                                                                            | -0.129 | 0.045 | 0.027  | <b>0.298</b> | -0.131 | <b>0.513</b> |
| Fibin        | fin bud initiation factor homolog (zebrafish)                                                 | -0.132 | 0.006 | 0.081  | <b>0.567</b> | -0.103 | <b>0.511</b> |
| LOC305806    | similar to glutaredoxin 1 (thioltransferase); glutaredoxin                                    | -0.148 | 0.035 | -0.150 | <b>0.508</b> | 0.043  | <b>0.173</b> |
| Ripk3        | receptor-interacting serine-threonine kinase 3                                                | -0.154 | 0.040 | -0.053 | <b>0.426</b> | -0.138 | <b>0.534</b> |
| Fcgbp        | Fc fragment of IgG binding protein                                                            | -0.166 | 0.039 | 0.056  | <b>0.405</b> | 0.398  | 0.016        |
| Ggt1         | gamma-glutamyltransferase 1                                                                   | -0.167 | 0.011 | -0.416 | 0.010        | -0.259 | <b>0.841</b> |
| Ptpn22       | protein tyrosine phosphatase, non-receptor type 22 (lymphoid)                                 | -0.172 | 0.019 | 0.342  | <b>0.076</b> | 0.587  | 0.009        |
| RGD1563888   | similar to DNA segment, Chr 16, ERATO Doi 472, expressed                                      | -0.173 | 0.044 | 0.040  | <b>0.352</b> | 0.207  | <b>0.799</b> |
| Lyz2         | lysozyme 2                                                                                    | -0.177 | 0.039 | 0.331  | 0.004        | 0.220  | 0.010        |
| Gstt3        | glutathione S-transferase, theta 3                                                            | -0.177 | 0.040 | -0.334 | 0.030        | -0.052 | <b>0.318</b> |
| Synm         | synemin, intermediate filament protein                                                        | -0.179 | 0.023 | -0.005 | <b>0.646</b> | -0.160 | <b>0.799</b> |
| Lmod1        | leiomodulin 1 (smooth muscle)                                                                 | -0.180 | 0.047 | 0.056  | <b>0.713</b> | -0.113 | <b>0.668</b> |
| Steap4       | STEAP family member 4                                                                         | -0.180 | 0.045 | 0.104  | <b>0.738</b> | 0.157  | <b>0.824</b> |
| Lat2         | linker for activation of T cells family, member 2                                             | -0.181 | 0.045 | 0.084  | <b>0.244</b> | 0.195  | <b>0.437</b> |
| Acap1        | ArfGAP with coiled-coil, ankyrin repeat and PH domains 1                                      | -0.182 | 0.014 | 0.405  | 0.006        | 0.705  | 0.003        |
| Serpina3n    | serine (or cysteine) peptidase inhibitor, clade A, member 3N                                  | -0.185 | 0.002 | -0.092 | 0.002        | -1.808 | 0.000        |
| Cldn4        | claudin 4                                                                                     | -0.185 | 0.024 | 0.001  | <b>0.442</b> | 0.476  | 0.006        |
| Myocd        | myocardin                                                                                     | -0.188 | 0.044 | -0.088 | <b>0.502</b> | -0.076 | <b>0.464</b> |
| Ly6c         | Ly6-C antigen                                                                                 | -0.189 | 0.011 | 0.272  | <b>0.077</b> | 0.484  | 0.015        |
| Slc7a14      | solute carrier family 7 (cationic amino acid transporter, y+ system), member 14               | -0.193 | 0.041 | 0.230  | <b>0.951</b> | -0.042 | <b>0.682</b> |
| Thoc4        | THO complex 4                                                                                 | -0.194 | 0.050 | -0.036 | <b>0.343</b> | -0.335 | 0.025        |
| Col3a1       | collagen, type III, alpha 1                                                                   | -0.196 | 0.039 | 0.528  | 0.003        | 0.218  | <b>0.054</b> |
| Ly6g6e       | lymphocyte antigen 6 complex, locus G6E                                                       | -0.196 | 0.049 | 0.107  | <b>0.289</b> | 0.063  | <b>0.152</b> |
| Evi2a        | ecotropic viral integration site 2A                                                           | -0.198 | 0.022 | 0.170  | <b>0.091</b> | 0.515  | 0.007        |
| Serpine1     | serpin peptidase inhibitor, clade E (nexin, plasminogen activator inhibitor type 1), member 1 | -0.198 | 0.011 | -0.608 | 0.001        | -0.707 | 0.000        |
| Htr3a        | 5-hydroxytryptamine (serotonin) receptor 3a                                                   | -0.200 | 0.044 | -0.045 | <b>0.751</b> | -0.063 | <b>0.610</b> |
| Cd3g         | CD3 molecule, gamma                                                                           | -0.201 | 0.003 | 0.089  | 0.003        | 0.272  | 0.030        |

|              |                                                                           |        |       |        |              |        |              |
|--------------|---------------------------------------------------------------------------|--------|-------|--------|--------------|--------|--------------|
| Ceacam19     | carcinoembryonic antigen-related cell adhesion molecule 19                | -0.203 | 0.034 | 0.233  | <b>0.098</b> | 0.398  | 0.036        |
| Gsdmc        | gasdermin C                                                               | -0.210 | 0.018 | -0.214 | <b>0.415</b> | -0.119 | <b>0.284</b> |
| Pla2g2d      | phospholipase A2, group IID                                               | -0.210 | 0.009 | 0.430  | 0.002        | 0.631  | 0.001        |
| Htra3        | HtrA serine peptidase 3                                                   | -0.211 | 0.030 | 0.146  | <b>0.753</b> | -0.010 | <b>0.468</b> |
| Atp1a2       | ATPase, Na <sup>+</sup> /K <sup>+</sup> transporting, alpha 2 polypeptide | -0.211 | 0.018 | 0.426  | 0.007        | 0.096  | <b>0.708</b> |
| Plek         | pleckstrin                                                                | -0.214 | 0.032 | 0.302  | <b>0.324</b> | 0.563  | 0.010        |
| Csf1r        | colony stimulating factor 1 receptor                                      | -0.214 | 0.036 | 0.290  | <b>0.950</b> | 0.146  | <b>0.836</b> |
| Phf11        | PHD finger protein 11                                                     | -0.214 | 0.018 | 0.357  | 0.017        | 0.619  | 0.002        |
| Tmsb4x       | thymosin beta 4, X-linked                                                 | -0.216 | 0.040 | 0.010  | <b>0.458</b> | 0.219  | <b>0.750</b> |
| Mmp15        | matrix metalloproteinase 15                                               | -0.218 | 0.041 | -0.241 | <b>0.971</b> | -0.129 | <b>0.781</b> |
| Spon2        | spondin 2, extracellular matrix protein                                   | -0.222 | 0.040 | -0.012 | <b>0.451</b> | -0.238 | <b>0.924</b> |
| Fez1         | fasciculation and elongation protein zeta 1 (zygin I)                     | -0.224 | 0.046 | 0.092  | <b>0.544</b> | -0.159 | <b>0.810</b> |
| Igfbp2       | insulin-like growth factor binding protein 2                              | -0.226 | 0.015 | 0.254  | <b>0.928</b> | 0.065  | <b>0.602</b> |
| Cfh          | complement factor H                                                       | -0.226 | 0.027 | 0.198  | <b>0.902</b> | 0.056  | <b>0.624</b> |
| Syp          | synaptophysin                                                             | -0.227 | 0.048 | 0.018  | <b>0.559</b> | 0.009  | <b>0.634</b> |
| Efemp1       | EGF-containing fibulin-like extracellular matrix protein 1                | -0.231 | 0.046 | 0.023  | <b>0.485</b> | -0.221 | <b>0.872</b> |
| Ly86         | lymphocyte antigen 86                                                     | -0.236 | 0.006 | 0.287  | <b>0.076</b> | 0.468  | 0.028        |
| Rbp1         | retinol binding protein 1, cellular                                       | -0.237 | 0.037 | -0.043 | <b>0.208</b> | 0.209  | 0.038        |
| Ccl17        | chemokine (C-C motif) ligand 17                                           | -0.239 | 0.037 | -0.019 | 0.024        | 0.504  | 0.040        |
| Rmrp         | RNA component of mitochondrial RNA processing endoribonuclease            | -0.239 | 0.045 | -0.184 | <b>0.249</b> | 0.089  | 0.018        |
| Dok3         | docking protein 3                                                         | -0.241 | 0.041 | 0.340  | 0.018        | 0.485  | 0.006        |
| LOC501224    | similar to RIKEN cDNA 2610042L04                                          | -0.244 | 0.042 | 0.110  | <b>0.680</b> | 0.091  | <b>0.588</b> |
| Cebpd        | CCAAT/enhancer binding protein (C/EBP), delta                             | -0.244 | 0.028 | -0.224 | <b>0.690</b> | -0.709 | 0.000        |
| Ascl2        | achaete-scute complex homolog 2 (Drosophila)                              | -0.246 | 0.043 | -0.095 | <b>0.626</b> | -0.315 | 0.022        |
| Mylk         | myosin light chain kinase                                                 | -0.246 | 0.012 | -0.058 | <b>0.129</b> | 0.125  | 0.038        |
| Ly86         | lymphocyte antigen 86                                                     | -0.247 | 0.006 | 0.278  | <b>0.065</b> | 0.454  | 0.011        |
| Ccl20        | chemokine (C-C motif) ligand 20                                           | -0.250 | 0.036 | 0.465  | 0.018        | 0.526  | 0.001        |
| Gng13        | guanine nucleotide binding protein (G protein), gamma 13                  | -0.251 | 0.024 | -0.039 | <b>0.238</b> | -0.111 | <b>0.478</b> |
| Fcgbp1       | Fc fragment of IgG binding protein-like 1                                 | -0.255 | 0.045 | 0.014  | <b>0.274</b> | 0.290  | 0.032        |
| Clca1        | chloride channel accessory 1                                              | -0.255 | 0.027 | 0.012  | <b>0.247</b> | 0.172  | <b>0.060</b> |
| Spep         | SPEG complex locus                                                        | -0.255 | 0.037 | 0.182  | <b>0.917</b> | 0.114  | <b>0.589</b> |
| Olr991       | olfactory receptor 991                                                    | -0.256 | 0.039 | 0.088  | <b>0.520</b> | 0.134  | <b>0.696</b> |
| Myh11        | myosin, heavy chain 11, smooth muscle                                     | -0.256 | 0.033 | -0.032 | <b>0.662</b> | -0.246 | <b>0.869</b> |
| Itga11       | integrin, alpha 11                                                        | -0.256 | 0.045 | 0.084  | <b>0.649</b> | -0.101 | <b>0.606</b> |
| Pdlim7       | PDZ and LIM domain 7                                                      | -0.256 | 0.042 | 0.032  | <b>0.579</b> | -0.118 | <b>0.745</b> |
| Adams2       | ADAM metalloproteinase with thrombospondin type 1 motif, 2                | -0.257 | 0.038 | 0.186  | <b>0.753</b> | 0.083  | <b>0.489</b> |
| Gsg1         | germ cell associated 1                                                    | -0.257 | 0.018 | -0.110 | <b>0.664</b> | 0.254  | <b>0.527</b> |
| LOC363337    | similar to RIKEN cDNA 1700081O22                                          | -0.257 | 0.030 | -0.194 | <b>0.487</b> | -0.375 | 0.015        |
| Igfbp2       | insulin-like growth factor binding protein 2                              | -0.258 | 0.010 | 0.276  | <b>0.954</b> | 0.128  | <b>0.779</b> |
| Kbtbd8       | kelch repeat and BTB (POZ) domain containing 8                            | -0.258 | 0.049 | -0.224 | <b>0.909</b> | -0.349 | 0.017        |
| LOC100302465 | hypothetical LOC100302465                                                 | -0.259 | 0.048 | -0.188 | <b>0.661</b> | -0.308 | 0.025        |
| Lss          | lanosterol synthase (2,3-oxidosqualene-lanosterol cyclase)                | -0.260 | 0.014 | 0.066  | <b>0.705</b> | 0.056  | <b>0.597</b> |
| Slc15a3      | solute carrier family 15, member 3                                        | -0.262 | 0.021 | 0.338  | <b>0.693</b> | 0.417  | 0.025        |
| Grb14        | growth factor receptor bound protein 14                                   | -0.262 | 0.050 | -0.165 | <b>0.764</b> | -0.103 | <b>0.711</b> |
| Jph2         | junctional protein 2                                                      | -0.263 | 0.041 | -0.073 | <b>0.778</b> | -0.170 | <b>0.895</b> |
| Calb2        | calbindin 2                                                               | -0.263 | 0.029 | 0.217  | <b>0.915</b> | -0.059 | <b>0.634</b> |
| LOC100363170 | rCG53134-like                                                             | -0.263 | 0.036 | -0.186 | <b>0.346</b> | -0.462 | 0.005        |
| Nat2         | N-acetyltransferase 2                                                     | -0.264 | 0.026 | -0.419 | 0.001        | 0.071  | 0.015        |
| LOC689755    | hypothetical protein LOC689755                                            | -0.264 | 0.039 | -0.497 | 0.005        | -0.409 | 0.008        |
| Scin         | scinderin                                                                 | -0.264 | 0.045 | -0.188 | <b>0.833</b> | 0.166  | <b>0.911</b> |
| Ifitm3       | interferon induced transmembrane protein 3                                | -0.267 | 0.050 | 0.136  | <b>0.882</b> | -0.061 | <b>0.719</b> |
| Gal          | galanin prepropeptide                                                     | -0.267 | 0.024 | -0.018 | <b>0.501</b> | -0.105 | <b>0.736</b> |
| Napsa        | napsin A aspartic peptidase                                               | -0.269 | 0.024 | 0.363  | 0.004        | 0.394  | 0.001        |
| Higd1a       | HIG1 hypoxia inducible domain family, member 1A                           | -0.273 | 0.040 | -0.021 | 0.044        | 0.026  | <b>0.126</b> |
| Lat          | linker for activation of T cells                                          | -0.274 | 0.004 | 0.315  | <b>0.074</b> | 0.735  | 0.006        |
| MGC114520    | similar to hypothetical protein E230019M04                                | -0.274 | 0.044 | -0.353 | 0.025        | -0.130 | <b>0.864</b> |
| Cmtm3        | CKLF-like MARVEL transmembrane domain containing 3                        | -0.275 | 0.043 | 0.098  | <b>0.809</b> | 0.085  | <b>0.863</b> |
| Cd99l2       | CD99 molecule-like 2                                                      | -0.276 | 0.042 | -0.215 | <b>0.817</b> | 0.011  | <b>0.370</b> |

|              |                                                                                  |        |       |        |              |        |              |
|--------------|----------------------------------------------------------------------------------|--------|-------|--------|--------------|--------|--------------|
| Dact3        | dapper, antagonist of beta-catenin, homolog 3 (Xenopus laevis)                   | -0.277 | 0.049 | -0.058 | <b>0.512</b> | -0.098 | <b>0.404</b> |
| Pgcp         | plasma glutamate carboxypeptidase                                                | -0.278 | 0.047 | 0.136  | <b>0.755</b> | 0.010  | <b>0.631</b> |
| Reep1        | receptor accessory protein 1                                                     | -0.279 | 0.021 | -0.001 | <b>0.562</b> | -0.113 | <b>0.852</b> |
| Nefm         | neurofilament, medium polypeptide                                                | -0.280 | 0.028 | 0.186  | <b>0.743</b> | 0.141  | <b>0.783</b> |
| Abcg3l3      | ATP-binding cassette, subfamily G (WHITE), member 3-like 3                       | -0.280 | 0.024 | -0.090 | <b>0.532</b> | 0.299  | 0.031        |
| Trim30       | tripartite motif-containing 30                                                   | -0.281 | 0.004 | -0.097 | <b>0.323</b> | 0.164  | <b>0.099</b> |
| RGD1306208   | hypothetical LOC296483                                                           | -0.282 | 0.049 | -0.195 | <b>0.784</b> | -0.123 | <b>0.868</b> |
| Polr1a       | polymerase (RNA) I polypeptide A                                                 | -0.284 | 0.039 | -0.107 | <b>0.451</b> | 0.140  | <b>0.090</b> |
| Bdkrb1       | bradykinin receptor B1                                                           | -0.285 | 0.049 | -0.203 | <b>0.897</b> | -0.381 | 0.016        |
| Gbp5         | guanylate binding protein 5                                                      | -0.285 | 0.038 | 0.003  | <b>0.423</b> | 0.033  | <b>0.334</b> |
| Dnajb5       | DnaJ (Hsp40) homolog, subfamily B, member 5                                      | -0.286 | 0.040 | -0.169 | <b>0.455</b> | -0.469 | 0.015        |
| Olfml3       | olfactomedin-like 3                                                              | -0.286 | 0.027 | 0.200  | <b>0.909</b> | 0.170  | <b>0.912</b> |
| Lst1         | leukocyte specific transcript 1                                                  | -0.287 | 0.006 | 0.221  | <b>0.065</b> | 0.540  | 0.008        |
| Pkib         | protein kinase (cAMP-dependent, catalytic) inhibitor beta                        | -0.287 | 0.011 | -0.229 | <b>0.877</b> | 0.135  | <b>0.240</b> |
| RGD1310166   | similar to Chromodomain-helicase-DNA-binding protein 1 (CHD-1)                   | -0.287 | 0.020 | -0.175 | <b>0.309</b> | 0.288  | 0.011        |
| LOC100362200 | olfactory receptor 10-like                                                       | -0.288 | 0.047 | -0.223 | <b>0.956</b> | -0.209 | <b>0.941</b> |
| Rit2         | Ras-like without CAAX 2                                                          | -0.288 | 0.034 | 0.095  | <b>0.564</b> | 0.121  | <b>0.689</b> |
| Fhl1         | four and a half LIM domains 1                                                    | -0.288 | 0.031 | -0.081 | <b>0.457</b> | -0.439 | 0.009        |
| Wbp5         | WW domain binding protein 5                                                      | -0.288 | 0.048 | -0.193 | <b>0.833</b> | -0.128 | <b>0.700</b> |
| Rab6b        | RAB6B, member RAS oncogene family                                                | -0.290 | 0.041 | 0.144  | <b>0.815</b> | -0.034 | <b>0.449</b> |
| Mmp3         | matrix metalloproteinase 3                                                       | -0.291 | 0.045 | -0.357 | 0.027        | -0.236 | <b>0.793</b> |
| Cd300lf      | Cd300 molecule-like family member F                                              | -0.291 | 0.036 | -0.185 | <b>0.865</b> | -0.134 | <b>0.822</b> |
| Myl12b       | myosin, light chain 12B, regulatory                                              | -0.291 | 0.038 | 0.025  | <b>0.595</b> | -0.142 | <b>0.735</b> |
| Gfpt1        | glutamine fructose-6-phosphate transaminase 1                                    | -0.292 | 0.045 | -0.354 | 0.023        | -0.148 | <b>0.804</b> |
| Igfbp6       | insulin-like growth factor binding protein 6                                     | -0.293 | 0.019 | -0.251 | <b>0.731</b> | -0.311 | <b>0.918</b> |
| Ctsk         | cathepsin K                                                                      | -0.294 | 0.046 | 0.003  | <b>0.618</b> | -0.150 | <b>0.938</b> |
| Eaf2         | ELL associated factor 2                                                          | -0.295 | 0.024 | 0.282  | <b>0.440</b> | 0.823  | 0.004        |
| LOC684280    | similar to Class I histocompatibility antigen, Non-RT1.A alpha-1 chain precursor | -0.295 | 0.037 | -0.243 | 0.012        | -0.250 | <b>0.746</b> |
| Cacna1c      | calcium channel, voltage-dependent, L type, alpha 1C subunit                     | -0.295 | 0.046 | 0.002  | <b>0.641</b> | -0.085 | <b>0.657</b> |
| Chchd6       | coiled-coil-helix-coiled-coil-helix domain containing 6                          | -0.296 | 0.047 | -0.185 | <b>0.921</b> | -0.196 | <b>0.911</b> |
| Cplx1        | complexin 1                                                                      | -0.296 | 0.048 | 0.045  | <b>0.657</b> | -0.039 | <b>0.583</b> |
| Myoc         | myocilin                                                                         | -0.296 | 0.040 | 0.084  | <b>0.520</b> | 0.136  | <b>0.604</b> |
| Glrx1        | glutaredoxin 1                                                                   | -0.297 | 0.049 | -0.094 | <b>0.450</b> | 0.029  | <b>0.359</b> |
| Rassf6       | Ras association (RalGDS/AF-6) domain family member 6                             | -0.297 | 0.048 | -0.325 | 0.010        | -0.175 | <b>0.571</b> |
| Sparc        | secreted protein, acidic, cysteine-rich (osteonectin)                            | -0.298 | 0.038 | 0.147  | <b>0.737</b> | -0.059 | <b>0.568</b> |
| Bri3bp       | Bri3 binding protein                                                             | -0.298 | 0.027 | -0.252 | <b>0.925</b> | -0.127 | <b>0.820</b> |
| LOC690626    | hypothetical protein LOC690626                                                   | -0.298 | 0.047 | -0.003 | <b>0.203</b> | -0.139 | <b>0.389</b> |
| Rem1         | RAS (RAD and GEM)-like GTP-binding 1                                             | -0.298 | 0.036 | -0.139 | <b>0.894</b> | -0.259 | <b>0.966</b> |
| Chrna6       | cholinergic receptor, nicotinic, alpha 6                                         | -0.298 | 0.049 | -0.066 | <b>0.662</b> | 0.014  | <b>0.389</b> |
| Socs3        | suppressor of cytokine signaling 3                                               | -0.298 | 0.035 | -0.441 | 0.013        | -0.443 | 0.010        |
| Btnl7        | butyrophilin-like 7                                                              | -0.299 | 0.047 | 0.196  | <b>0.435</b> | 0.487  | 0.003        |
| Pcolce       | procollagen C-endopeptidase enhancer                                             | -0.299 | 0.042 | 0.161  | <b>0.748</b> | -0.027 | <b>0.517</b> |
| Alox5        | arachidonate 5-lipoxygenase                                                      | -0.300 | 0.042 | 0.065  | <b>0.611</b> | 0.107  | <b>0.747</b> |
| Slc3a1       | solute carrier family 3, member 1                                                | -0.300 | 0.046 | -0.021 | <b>0.266</b> | -0.212 | <b>0.053</b> |
| Sstr2        | somatostatin receptor 2                                                          | -0.300 | 0.036 | -0.619 | 0.001        | -0.463 | 0.006        |
| Ass1         | argininosuccinate synthase 1                                                     | -0.300 | 0.018 | -0.375 | 0.018        | -0.342 | 0.016        |
| Sstr3        | somatostatin receptor 3                                                          | -0.301 | 0.008 | 0.359  | 0.016        | 0.623  | 0.007        |
| Csrp1        | cysteine and glycine-rich protein 1                                              | -0.302 | 0.046 | -0.035 | <b>0.689</b> | -0.159 | <b>0.875</b> |
| Gprc5a       | G protein-coupled receptor, family C, group 5, member A                          | -0.302 | 0.032 | 0.006  | <b>0.521</b> | 0.199  | <b>0.708</b> |
| Sgca         | sarcoglycan, alpha (dystrophin-associated glycoprotein)                          | -0.302 | 0.009 | 0.518  | 0.011        | 0.346  | <b>0.068</b> |
| Gpr65        | G-protein coupled receptor 65                                                    | -0.303 | 0.036 | 0.077  | <b>0.355</b> | 0.322  | 0.021        |
| Plk3         | polo-like kinase 3                                                               | -0.305 | 0.045 | -0.234 | <b>0.899</b> | -0.431 | 0.007        |
| LOC680590    | hypothetical protein LOC680590                                                   | -0.305 | 0.049 | 0.021  | <b>0.665</b> | -0.245 | <b>0.949</b> |
| Cyp7b1       | cytochrome P450, family 7, subfamily b, polypeptide 1                            | -0.305 | 0.039 | 0.071  | <b>0.819</b> | -0.053 | <b>0.701</b> |
| Pth          | parathyroid hormone                                                              | -0.306 | 0.048 | -0.215 | <b>0.607</b> | -0.335 | 0.025        |



|            |                                                                                          |        |       |        |              |        |              |
|------------|------------------------------------------------------------------------------------------|--------|-------|--------|--------------|--------|--------------|
| Als2cr8    | amyotrophic lateral sclerosis 2 (juvenile) chromosome region, candidate 8                | -0.306 | 0.045 | -0.122 | <b>0.888</b> | -0.002 | <b>0.585</b> |
| Gnat3      | guanine nucleotide binding protein, alpha transducing 3                                  | -0.307 | 0.024 | 0.118  | <b>0.147</b> | -0.063 | <b>0.441</b> |
| Rerg       | RAS-like, estrogen-regulated, growth-inhibitor                                           | -0.307 | 0.045 | -0.325 | 0.025        | -0.274 | <b>0.964</b> |
| Krt23      | keratin 23 (histone deacetylase inducible)                                               | -0.307 | 0.030 | 0.067  | <b>0.453</b> | 0.004  | <b>0.545</b> |
| Zfp503     | zinc finger protein 503                                                                  | -0.307 | 0.037 | 0.004  | <b>0.507</b> | -0.060 | <b>0.570</b> |
| Sdf2l1     | stromal cell-derived factor 2-like 1                                                     | -0.308 | 0.047 | -0.074 | <b>0.725</b> | 0.041  | <b>0.560</b> |
| Gucy1b3    | guanylate cyclase 1, soluble, beta 3                                                     | -0.308 | 0.035 | -0.171 | <b>0.599</b> | -0.154 | <b>0.419</b> |
| LOC502684  | hypothetical protein LOC502684                                                           | -0.308 | 0.050 | -0.064 | <b>0.712</b> | -0.004 | <b>0.517</b> |
| Rnf152     | ring finger protein 152                                                                  | -0.308 | 0.045 | -0.591 | 0.001        | -0.161 | <b>0.466</b> |
| LOC688452  | hypothetical protein LOC688452                                                           | -0.308 | 0.032 | 0.169  | <b>0.751</b> | 0.077  | <b>0.497</b> |
| Gfra3      | GDNF family receptor alpha 3                                                             | -0.309 | 0.031 | -0.006 | <b>0.507</b> | -0.037 | <b>0.545</b> |
| Gnpnat1    | glucosamine-phosphate N-acetyltransferase 1                                              | -0.310 | 0.049 | -0.285 | 0.034        | -0.317 | 0.027        |
| Cenpt      | centromere protein T                                                                     | -0.310 | 0.003 | -0.553 | 0.001        | -0.688 | 0.000        |
| Nat5       | N-acetyltransferase 5                                                                    | -0.310 | 0.047 | -0.218 | <b>0.795</b> | -0.131 | <b>0.645</b> |
| Cald1      | caldesmon 1                                                                              | -0.310 | 0.044 | -0.103 | <b>0.821</b> | -0.032 | <b>0.567</b> |
| Dbil5      | diazepam binding inhibitor-like 5                                                        | -0.311 | 0.049 | -0.190 | <b>0.957</b> | 0.000  | <b>0.495</b> |
| Lum        | lumican                                                                                  | -0.311 | 0.014 | 0.084  | <b>0.622</b> | -0.100 | <b>0.698</b> |
| Abcc6      | ATP-binding cassette, subfamily C (CFTR/MRP), member 6                                   | -0.312 | 0.041 | -0.169 | <b>0.884</b> | -0.055 | <b>0.580</b> |
| C1s        | complement component 1, s subcomponent                                                   | -0.312 | 0.049 | 0.053  | <b>0.611</b> | 0.230  | <b>0.962</b> |
| Fermt3     | fermitin family member 3                                                                 | -0.313 | 0.043 | -0.098 | <b>0.488</b> | 0.206  | <b>0.620</b> |
| Ppyr1      | pancreatic polypeptide receptor 1                                                        | -0.314 | 0.028 | -0.081 | <b>0.624</b> | 0.013  | <b>0.467</b> |
| RGD1306565 | similar to apoptosis signal-regulating kinase 1                                          | -0.314 | 0.043 | -0.339 | 0.030        | -0.034 | <b>0.415</b> |
| Sgcd       | sarcoglycan, delta (dystrophin-associated glycoprotein)                                  | -0.314 | 0.039 | 0.012  | <b>0.226</b> | 0.078  | <b>0.374</b> |
| Tmem17     | transmembrane protein 17                                                                 | -0.315 | 0.037 | -0.169 | <b>0.891</b> | -0.143 | <b>0.868</b> |
| Slc1a2     | solute carrier family 1 (glial high affinity glutamate transporter), member 2            | -0.315 | 0.030 | -0.349 | 0.034        | -0.243 | <b>0.790</b> |
| Ccl20      | chemokine (C-C motif) ligand 20                                                          | -0.316 | 0.025 | 0.441  | 0.020        | 0.526  | 0.001        |
| Vom2r38    | vomer nasal 2 receptor, 38                                                               | -0.317 | 0.039 | 1.642  | 0.021        | 2.350  | 0.007        |
| Psbm8      | proteasome (prosome, macropain) subunit, beta type 8 (large multifunctional peptidase 7) | -0.317 | 0.037 | 0.175  | <b>0.574</b> | 0.245  | <b>0.396</b> |
| Rnase6     | ribonuclease, RNase A family, 6                                                          | -0.318 | 0.046 | 0.109  | <b>0.319</b> | 0.326  | <b>0.815</b> |
| Olr813     | olfactory receptor 813                                                                   | -0.318 | 0.025 | -0.468 | 0.006        | -0.207 | <b>0.758</b> |
| Dcun1d2    | DCN1, defective in cullin neddylation 1, domain containing 2 (S. cerevisiae)             | -0.319 | 0.045 | -0.224 | <b>0.861</b> | -0.060 | <b>0.473</b> |
| Krt33a     | keratin 33A                                                                              | -0.319 | 0.048 | -0.263 | <b>0.614</b> | -0.308 | <b>0.665</b> |
| Shbg       | sex hormone binding globulin                                                             | -0.320 | 0.044 | 0.129  | <b>0.623</b> | 0.235  | <b>0.754</b> |
| Guca1b     | guanylate cyclase activator 1B                                                           | -0.320 | 0.039 | -0.084 | <b>0.440</b> | -0.124 | <b>0.548</b> |
| Pgf        | placental growth factor                                                                  | -0.321 | 0.040 | 0.055  | <b>0.496</b> | 0.168  | <b>0.768</b> |
| Bex2       | brain expressed X-linked 2                                                               | -0.321 | 0.044 | -0.011 | <b>0.653</b> | -0.077 | <b>0.765</b> |
| Gal        | galanin prepropeptide                                                                    | -0.321 | 0.014 | -0.089 | <b>0.537</b> | -0.105 | <b>0.587</b> |
| Itgad      | integrin, alpha D                                                                        | -0.322 | 0.047 | 0.177  | <b>0.411</b> | 0.421  | 0.018        |
| Siah2      | seven in absentia 2                                                                      | -0.323 | 0.044 | -0.175 | <b>0.751</b> | -0.292 | <b>0.908</b> |
| Mrps10     | mitochondrial ribosomal protein S10                                                      | -0.323 | 0.026 | -0.103 | 0.003        | -0.160 | 0.016        |
| Oasl2      | 2'-5' oligoadenylate synthetase-like 2                                                   | -0.323 | 0.048 | 0.040  | <b>0.639</b> | 0.162  | <b>0.856</b> |
| Scly       | selenocysteine lyase                                                                     | -0.323 | 0.049 | -0.284 | <b>0.939</b> | -0.235 | <b>0.962</b> |
| LOC362795  | immunoglobulin G heavy chain                                                             | -0.323 | 0.003 | 1.130  | 0.000        | 1.016  | 0.000        |
| Cryl1      | crystallin, lambda 1                                                                     | -0.324 | 0.039 | -0.397 | 0.015        | -0.303 | <b>0.986</b> |
| Kmo        | kynurenine 3-monooxygenase (kynurenine 3-hydroxylase)                                    | -0.324 | 0.039 | -0.029 | <b>0.587</b> | 0.100  | <b>0.607</b> |
| Ptprz1     | protein tyrosine phosphatase, receptor-type, Z polypeptide 1                             | -0.324 | 0.040 | 0.215  | <b>0.870</b> | 0.064  | <b>0.708</b> |
| Fbln5      | fibulin 5                                                                                | -0.324 | 0.040 | 0.062  | <b>0.512</b> | 0.038  | <b>0.546</b> |
| Col1a2     | collagen, type I, alpha 2                                                                | -0.325 | 0.019 | 0.203  | <b>0.511</b> | -0.091 | <b>0.419</b> |
| Mrps21     | mitochondrial ribosomal protein S21                                                      | -0.325 | 0.043 | 0.034  | <b>0.592</b> | -0.081 | <b>0.780</b> |
| LOC685617  | similar to spermatogenesis associated glutamate (E)-rich protein 4b                      | -0.325 | 0.040 | 0.129  | <b>0.478</b> | -0.131 | <b>0.524</b> |
| Gpr171     | G protein-coupled receptor 171                                                           | -0.325 | 0.015 | 0.177  | <b>0.664</b> | 0.202  | <b>0.555</b> |
| LOC171573  | spleen protein 1 precursor                                                               | -0.325 | 0.045 | -0.050 | <b>0.474</b> | -0.173 | <b>0.695</b> |
| Wnt5b      | wingless-type MMTV integration site family, member 5B                                    | -0.325 | 0.040 | -0.010 | <b>0.611</b> | -0.061 | <b>0.689</b> |
| Gng8       | guanine nucleotide binding protein (G protein), gamma 8                                  | -0.326 | 0.038 | 0.146  | <b>0.868</b> | 0.001  | <b>0.629</b> |

|              |                                                                                          |        |              |        |              |        |              |
|--------------|------------------------------------------------------------------------------------------|--------|--------------|--------|--------------|--------|--------------|
| Rb1          | retinoblastoma 1                                                                         | -0.326 | 0.042        | -0.050 | <b>0.384</b> | -0.098 | <b>0.418</b> |
| Nol3         | nucleolar protein 3 (apoptosis repressor with CARD domain)                               | -0.326 | 0.032        | 0.004  | <b>0.554</b> | -0.158 | <b>0.876</b> |
| LOC685636    | hypothetical protein LOC685636                                                           | -0.327 | 0.048        | 0.107  | <b>0.545</b> | 0.100  | <b>0.815</b> |
| Ctps         | CTP synthase                                                                             | -0.327 | 0.046        | -0.027 | <b>0.586</b> | -0.097 | <b>0.654</b> |
| Gylt1b       | glycosyltransferase-like 1B                                                              | -0.328 | 0.044        | -0.185 | <b>0.829</b> | -0.151 | <b>0.795</b> |
| Ppy          | pancreatic polypeptide                                                                   | -0.328 | 0.050        | -0.640 | 0.001        | -0.131 | <b>0.744</b> |
| Hebp1        | heme binding protein 1                                                                   | -0.328 | <b>0.065</b> | -0.091 | <b>0.693</b> | -0.100 | <b>0.687</b> |
| Akr1c19      | aldo-keto reductase family 1, member C19                                                 | -0.328 | 0.039        | -0.210 | <b>0.473</b> | -0.074 | <b>0.225</b> |
| Pira2        | paired-Ig-like receptor A2                                                               | -0.328 | 0.041        | 0.167  | <b>0.830</b> | 0.073  | <b>0.616</b> |
| Vip          | vasoactive intestinal peptide                                                            | -0.329 | 0.038        | -0.342 | 0.018        | -0.191 | <b>0.639</b> |
| Batf3        | basic leucine zipper transcription factor, ATF-like 3                                    | -0.329 | 0.018        | 0.019  | <b>0.487</b> | 0.242  | <b>0.635</b> |
| Postn        | periostin, osteoblast specific factor                                                    | -0.329 | 0.043        | 0.015  | <b>0.311</b> | 0.133  | <b>0.635</b> |
| Olfml1       | olfactomedin-like 1                                                                      | -0.329 | 0.044        | 0.051  | <b>0.700</b> | -0.092 | <b>0.805</b> |
| Vom1r38      | vomer nasal 1 receptor 38                                                                | -0.329 | 0.047        | -0.455 | 0.003        | -0.288 | <b>0.925</b> |
| LOC690576    | similar to Discs large homolog 5 (Placenta and prostate DLG) (Discs large protein P-dlg) | -0.329 | 0.042        | 0.074  | <b>0.646</b> | -0.123 | <b>0.586</b> |
| Catsperg1    | cation channel, sperm-associated, gamma 1                                                | -0.330 | 0.047        | 0.193  | <b>0.785</b> | 0.287  | <b>0.051</b> |
| Sh3bgr       | SH3 domain binding glutamic acid-rich protein                                            | -0.330 | 0.036        | -0.088 | <b>0.438</b> | -0.124 | <b>0.494</b> |
| Cadps        | Ca <sup>++</sup> -dependent secretion activator                                          | -0.330 | 0.050        | -0.007 | <b>0.574</b> | -0.024 | <b>0.499</b> |
| Cspg4        | chondroitin sulfate proteoglycan 4                                                       | -0.331 | 0.047        | 0.205  | <b>0.884</b> | 0.009  | <b>0.331</b> |
| Cdc42ep1     | CDC42 effector protein (Rho GTPase binding) 1                                            | -0.331 | 0.034        | -0.225 | <b>0.922</b> | -0.500 | 0.003        |
| Ces1e        | carboxylesterase 1E                                                                      | -0.332 | 0.050        | 0.005  | <b>0.341</b> | -0.471 | 0.005        |
| Apobr        | apolipoprotein B receptor                                                                | -0.332 | 0.050        | 0.154  | <b>0.556</b> | 0.235  | 0.045        |
| Rgs7bp       | regulator of G-protein signaling 7 binding protein                                       | -0.332 | 0.036        | -0.006 | <b>0.531</b> | -0.033 | <b>0.551</b> |
| RGD1564776   | similar to ornithine decarboxylase-like protein                                          | -0.332 | 0.041        | -0.072 | <b>0.650</b> | -0.233 | <b>0.915</b> |
| Hcst         | hematopoietic cell signal transducer                                                     | -0.332 | 0.007        | 0.248  | <b>0.056</b> | 0.511  | 0.003        |
| RGD1565203   | similar to ESO3 protein                                                                  | -0.332 | 0.043        | -0.072 | <b>0.825</b> | 0.013  | <b>0.681</b> |
| Sh2d7        | SH2 domain containing 7                                                                  | -0.332 | 0.035        | 0.139  | <b>0.521</b> | 0.031  | <b>0.540</b> |
| Apob         | apolipoprotein B                                                                         | -0.333 | 0.026        | -0.593 | 0.002        | -0.390 | 0.011        |
| Fads6        | fatty acid desaturase domain family, member 6                                            | -0.334 | 0.050        | -0.007 | <b>0.691</b> | 0.001  | <b>0.638</b> |
| Ndufs4       | NADH dehydrogenase (ubiquinone) Fe-S protein 4                                           | -0.334 | 0.044        | -0.146 | <b>0.757</b> | -0.226 | <b>0.873</b> |
| Afap1        | actin filament associated protein 1                                                      | -0.334 | 0.049        | -0.015 | <b>0.493</b> | -0.027 | <b>0.389</b> |
| Olr59        | olfactory receptor 59                                                                    | -0.334 | 0.050        | 0.385  | 0.019        | 0.626  | 0.001        |
| Slc14a2      | solute carrier family 14 (urea transporter), member 2                                    | -0.334 | 0.042        | -0.228 | 0.038        | 0.132  | 0.003        |
| Tnfrsf14     | tumor necrosis factor receptor superfamily, member 14                                    | -0.334 | 0.040        | 0.102  | <b>0.680</b> | 0.176  | <b>0.939</b> |
| Oasl         | 2'-5'-oligoadenylate synthetase-like                                                     | -0.335 | 0.010        | -0.564 | 0.001        | -0.321 | <b>0.912</b> |
| Nup210l      | nucleoporin 210-like                                                                     | -0.335 | 0.042        | -0.298 | 0.030        | 0.007  | <b>0.561</b> |
| RGD1565785   | similar to chromosome X open reading frame 21                                            | -0.335 | 0.020        | -0.055 | <b>0.549</b> | 0.176  | <b>0.471</b> |
| Try10        | trypsin 10                                                                               | -0.335 | 0.010        | 0.202  | 0.001        | 0.207  | 0.003        |
| Mpdz         | multiple PDZ domain protein                                                              | -0.335 | 0.043        | -0.055 | <b>0.546</b> | -0.048 | <b>0.456</b> |
| Ppap2a       | phosphatidic acid phosphatase type 2A                                                    | -0.335 | 0.044        | -0.039 | <b>0.736</b> | -0.145 | <b>0.892</b> |
| Trps1        | trichorhinophalangeal syndrome I                                                         | -0.336 | 0.048        | -0.028 | <b>0.577</b> | -0.115 | <b>0.733</b> |
| Frzb         | frizzled-related protein                                                                 | -0.336 | 0.030        | -0.064 | <b>0.699</b> | -0.020 | <b>0.594</b> |
| Prph         | peripherin                                                                               | -0.336 | 0.019        | 0.065  | <b>0.621</b> | 0.024  | <b>0.421</b> |
| RGD1311084   | similar to 1700113K14Rik protein                                                         | -0.336 | 0.039        | 0.166  | <b>0.301</b> | -0.004 | <b>0.556</b> |
| Hip1         | huntingtin interacting protein 1                                                         | -0.336 | 0.047        | 0.110  | <b>0.744</b> | 0.056  | <b>0.583</b> |
| Tnfaip6      | tumor necrosis factor alpha induced protein 6                                            | -0.336 | 0.035        | -0.275 | <b>0.910</b> | -0.499 | 0.003        |
| Xcr1         | chemokine (C motif) receptor 1                                                           | -0.337 | 0.033        | -0.246 | <b>0.886</b> | -0.029 | <b>0.529</b> |
| Cel          | carboxyl ester lipase                                                                    | -0.337 | 0.047        | -0.135 | <b>0.824</b> | -0.079 | <b>0.665</b> |
| Mgp          | matrix Gla protein                                                                       | -0.337 | 0.023        | 0.298  | <b>0.829</b> | -0.052 | <b>0.486</b> |
| Cmpk1        | cytidine monophosphate (UMP-CMP) kinase 1                                                | -0.338 | 0.035        | -0.335 | 0.017        | -0.134 | <b>0.566</b> |
| Gpr33        | G protein-coupled receptor 33                                                            | -0.338 | 0.050        | -0.048 | <b>0.733</b> | -0.041 | <b>0.681</b> |
| LOC685226    | similar to spermatogenesis associated glutamate (E)-rich protein 4d                      | -0.338 | 0.033        | 0.109  | <b>0.301</b> | -0.204 | <b>0.514</b> |
| Prkar1b      | protein kinase, cAMP dependent regulatory, type I, beta                                  | -0.338 | 0.039        | 0.035  | <b>0.671</b> | -0.038 | <b>0.609</b> |
| Sntg2        | syntrophin, gamma 2                                                                      | -0.338 | 0.024        | -0.060 | <b>0.650</b> | -0.211 | <b>0.875</b> |
| Tex9         | testis expressed 9                                                                       | -0.338 | 0.037        | -0.333 | 0.027        | -0.102 | <b>0.812</b> |
| Calr         | calreticulin                                                                             | -0.338 | <b>0.060</b> | -0.178 | <b>0.684</b> | -0.156 | <b>0.809</b> |
| Ces2i        | carboxylesterase 2I                                                                      | -0.338 | 0.045        | -0.245 | 0.030        | -0.173 | <b>0.847</b> |
| LOC100362690 | rCG64164-like                                                                            | -0.338 | 0.046        | -0.234 | <b>0.903</b> | -0.196 | <b>0.864</b> |
| Slc12a8      | solute carrier family 12 (potassium/chloride transporters), member 8                     | -0.339 | 0.039        | -0.485 | 0.002        | -0.252 | 0.027        |

|            |                                                                                                |        |       |        |              |        |              |
|------------|------------------------------------------------------------------------------------------------|--------|-------|--------|--------------|--------|--------------|
| Dpep2      | dipeptidase 2                                                                                  | -0.339 | 0.039 | -0.141 | <b>0.898</b> | -0.039 | <b>0.752</b> |
| Dnajb11    | DnaJ (Hsp40) homolog, subfamily B, member 11                                                   | -0.339 | 0.048 | -0.070 | <b>0.651</b> | -0.096 | <b>0.733</b> |
| Olr832     | olfactory receptor 832                                                                         | -0.339 | 0.026 | -0.103 | <b>0.703</b> | -0.160 | <b>0.665</b> |
| Spcs3      | signal peptidase complex subunit 3 homolog (S. cerevisiae)                                     | -0.339 | 0.043 | -0.240 | <b>0.795</b> | -0.220 | <b>0.734</b> |
| Gpr20      | G protein-coupled receptor 20                                                                  | -0.339 | 0.049 | -0.242 | <b>0.837</b> | -0.313 | <b>0.941</b> |
| RGD1565166 | similar to MGC45438 protein                                                                    | -0.339 | 0.038 | -0.697 | 0.001        | -0.501 | 0.006        |
| Casp12     | caspase 12                                                                                     | -0.340 | 0.042 | 0.018  | <b>0.519</b> | -0.220 | <b>0.960</b> |
| Abcg4      | ATP-binding cassette, subfamily G (WHITE), member 4                                            | -0.340 | 0.028 | 0.224  | <b>0.905</b> | 0.041  | <b>0.411</b> |
| Tmem14a    | transmembrane protein 14A                                                                      | -0.341 | 0.048 | 0.058  | <b>0.292</b> | 0.055  | <b>0.585</b> |
| Fdxacb1    | ferredoxin-fold anticodon binding domain containing 1                                          | -0.341 | 0.039 | -0.361 | 0.023        | -0.226 | <b>0.751</b> |
| Slc7a3     | solute carrier family 7 (cationic amino acid transporter, y+ system), member 3                 | -0.341 | 0.043 | 0.146  | <b>0.825</b> | 0.373  | 0.037        |
| Lrp5       | low density lipoprotein receptor-related protein 5                                             | -0.342 | 0.037 | -0.375 | 0.024        | -0.360 | 0.027        |
| RGD1307537 | similar to RIKEN cDNA 4933417A18                                                               | -0.342 | 0.037 | -0.347 | 0.027        | -0.239 | <b>0.969</b> |
| Vom1r45    | vomer nasal 1 receptor 45                                                                      | -0.342 | 0.036 | -0.435 | 0.011        | -0.370 | 0.008        |
| Cxcr3      | chemokine (C-X-C motif) receptor 3                                                             | -0.342 | 0.036 | 0.000  | <b>0.496</b> | 0.258  | <b>0.923</b> |
| Slc18a2    | solute carrier family 18 (vesicular monoamine), member 2                                       | -0.342 | 0.044 | -0.071 | <b>0.399</b> | -0.204 | <b>0.680</b> |
| Thsd7a     | thrombospondin, type I, domain containing 7A                                                   | -0.342 | 0.043 | -0.052 | <b>0.516</b> | 0.003  | <b>0.559</b> |
| Ffar2      | free fatty acid receptor 2                                                                     | -0.343 | 0.020 | -0.440 | 0.006        | -0.043 | <b>0.468</b> |
| Tpst1      | tyrosylprotein sulfotransferase 1                                                              | -0.343 | 0.046 | 0.159  | <b>0.828</b> | 0.005  | <b>0.453</b> |
| Slc23a3    | solute carrier family 23 (nucleobase transporters), member 3                                   | -0.343 | 0.050 | -0.393 | 0.020        | -0.083 | <b>0.514</b> |
| Flna       | filamin A, alpha                                                                               | -0.343 | 0.032 | 0.111  | <b>0.878</b> | -0.084 | <b>0.661</b> |
| LOC688302  | similar to spermatogenesis associated glutamate (E)-rich protein 4d                            | -0.344 | 0.019 | -0.322 | 0.021        | -0.462 | 0.005        |
| Ces1e      | carboxylesterase 1E                                                                            | -0.344 | 0.038 | 0.099  | <b>0.606</b> | -0.473 | 0.004        |
| Fam180a    | family with sequence similarity 180, member A                                                  | -0.344 | 0.049 | 0.277  | <b>0.873</b> | 0.378  | 0.015        |
| Zfp703     | zinc finger protein 703                                                                        | -0.344 | 0.038 | -0.334 | 0.014        | -0.307 | <b>0.984</b> |
| Hes6       | hairy and enhancer of split 6 (Drosophila)                                                     | -0.344 | 0.042 | -0.262 | <b>0.985</b> | -0.153 | <b>0.901</b> |
| Lrrn4cl    | LRRN4 C-terminal like                                                                          | -0.344 | 0.029 | -0.003 | <b>0.454</b> | -0.144 | <b>0.680</b> |
| Adh4       | alcohol dehydrogenase 4 (class II), pi polypeptide                                             | -0.345 | 0.020 | -0.389 | 0.006        | 0.031  | <b>0.139</b> |
| Cyp4f18    | cytochrome P450, family 4, subfamily f, polypeptide 18                                         | -0.345 | 0.046 | 0.227  | <b>0.949</b> | 0.329  | 0.039        |
| Gls        | glutaminase                                                                                    | -0.345 | 0.041 | -0.312 | 0.016        | -0.385 | 0.015        |
| Bgn        | biglycan                                                                                       | -0.345 | 0.024 | 0.246  | <b>0.894</b> | 0.128  | <b>0.827</b> |
| Card9      | caspase recruitment domain family, member 9                                                    | -0.345 | 0.036 | 0.098  | <b>0.613</b> | 0.132  | <b>0.637</b> |
| Olr1326    | olfactory receptor 1326                                                                        | -0.345 | 0.039 | 0.105  | <b>0.765</b> | 0.016  | <b>0.465</b> |
| Ptgs1      | prostaglandin-endoperoxide synthase 1                                                          | -0.345 | 0.040 | 0.103  | <b>0.624</b> | 0.141  | <b>0.632</b> |
| Sec16b     | SEC16 homolog B (S. cerevisiae)                                                                | -0.345 | 0.027 | -0.584 | 0.001        | -0.594 | 0.001        |
| Fermt2     | fermitin family member 2                                                                       | -0.346 | 0.036 | -0.029 | <b>0.366</b> | -0.251 | <b>0.740</b> |
| Gpx4       | glutathione peroxidase 4                                                                       | -0.346 | 0.039 | -0.123 | <b>0.863</b> | -0.145 | <b>0.902</b> |
| Msra       | methionine sulfoxide reductase A                                                               | -0.346 | 0.033 | -0.002 | <b>0.298</b> | -0.149 | <b>0.773</b> |
| Igf1       | insulin-like growth factor 1                                                                   | -0.347 | 0.034 | 0.429  | 0.012        | 0.153  | <b>0.916</b> |
| Tnfsf14    | tumor necrosis factor (ligand) superfamily, member 14                                          | -0.347 | 0.019 | 0.205  | <b>0.482</b> | 0.274  | <b>0.683</b> |
| Sigmar1    | sigma non-opioid intracellular receptor 1                                                      | -0.348 | 0.049 | -0.190 | <b>0.847</b> | -0.210 | <b>0.922</b> |
| Lrrn4cl    | LRRN4 C-terminal like                                                                          | -0.348 | 0.040 | -0.115 | <b>0.804</b> | -0.093 | <b>0.743</b> |
| Fbxo23     | F-box only protein 23                                                                          | -0.348 | 0.044 | -0.357 | 0.024        | -0.261 | <b>0.965</b> |
| Tuba1a     | tubulin, alpha 1A                                                                              | -0.348 | 0.045 | -0.025 | <b>0.502</b> | -0.191 | <b>0.827</b> |
| Vmp1       | vacuole membrane protein 1                                                                     | -0.348 | 0.048 | 0.020  | <b>0.452</b> | -0.025 | <b>0.539</b> |
| Wisp1      | WNT1 inducible signaling pathway protein 1                                                     | -0.348 | 0.027 | 0.108  | <b>0.677</b> | -0.028 | <b>0.489</b> |
| RGD1311874 | hypothetical LOC300751                                                                         | -0.349 | 0.001 | -1.537 | 0.000        | -2.249 | 0.000        |
| Pde4b      | phosphodiesterase 4B, cAMP specific                                                            | -0.349 | 0.045 | -0.333 | <b>0.958</b> | -0.465 | 0.004        |
| Txlnb      | taxilin beta                                                                                   | -0.349 | 0.037 | -0.461 | 0.009        | -0.370 | 0.019        |
| Xcl1       | chemokine (C motif) ligand 1                                                                   | -0.349 | 0.032 | 0.130  | <b>0.688</b> | 0.257  | <b>0.056</b> |
| Tmsb10     | thymosin, beta 10                                                                              | -0.349 | 0.025 | -0.208 | <b>0.850</b> | -0.113 | <b>0.799</b> |
| Ifit2      | interferon-induced protein with tetratricopeptide repeats 2                                    | -0.349 | 0.045 | -0.185 | <b>0.933</b> | -0.229 | <b>0.960</b> |
| S100z      | S100 calcium binding protein Z                                                                 | -0.349 | 0.029 | -0.322 | <b>0.929</b> | -0.332 | 0.023        |
| Pcbp3      | poly(rC) binding protein 3                                                                     | -0.349 | 0.038 | 0.036  | <b>0.610</b> | -0.122 | <b>0.706</b> |
| Galnt3     | UDP-N-acetyl-alpha-D-galactosamine:polypeptide N-acetylgalactosaminyltransferase 3 (GalNAc-T3) | -0.349 | 0.038 | -0.581 | 0.001        | -0.305 | <b>0.957</b> |
| RGD1564257 | similar to hypothetical protein FLJ32825                                                       | -0.350 | 0.038 | 0.102  | <b>0.697</b> | 0.018  | <b>0.687</b> |

|           |                                                                                                  |        |       |        |              |        |              |
|-----------|--------------------------------------------------------------------------------------------------|--------|-------|--------|--------------|--------|--------------|
| Prodh     | proline dehydrogenase                                                                            | -0.350 | 0.020 | -0.034 | <b>0.325</b> | -0.381 | 0.012        |
| Kynu      | kynureninase                                                                                     | -0.350 | 0.005 | -0.482 | 0.001        | -0.062 | <b>0.056</b> |
| Mvd       | mevalonate (diphospho) decarboxylase                                                             | -0.350 | 0.020 | -0.195 | <b>0.858</b> | 0.015  | <b>0.454</b> |
| Tspan12   | tetraspanin 12                                                                                   | -0.350 | 0.043 | -0.302 | 0.034        | -0.427 | 0.010        |
| Sim2      | single-minded homolog 2 (Drosophila)                                                             | -0.351 | 0.048 | -0.242 | <b>0.833</b> | -0.176 | <b>0.681</b> |
| Echdc2    | enoyl CoA hydratase domain containing 2                                                          | -0.351 | 0.043 | -0.037 | <b>0.643</b> | -0.270 | <b>0.933</b> |
| Nedd4     | neural precursor cell expressed, developmentally down-regulated 4                                | -0.351 | 0.038 | 0.025  | <b>0.452</b> | -0.057 | <b>0.331</b> |
| Cdhr4     | cadherin-related family member 4                                                                 | -0.352 | 0.026 | 0.411  | 0.040        | 0.325  | <b>0.054</b> |
| Cpne7     | copine VII                                                                                       | -0.352 | 0.031 | 0.295  | <b>0.940</b> | 0.197  | <b>0.835</b> |
| Spink5    | serine peptidase inhibitor, Kazal type 5                                                         | -0.352 | 0.035 | 0.042  | <b>0.323</b> | -0.082 | <b>0.426</b> |
| Tnc       | tenascin C                                                                                       | -0.352 | 0.022 | -0.275 | <b>0.744</b> | -0.427 | 0.010        |
| Glt8d2    | glycosyltransferase 8 domain containing 2                                                        | -0.353 | 0.034 | -0.014 | <b>0.536</b> | -0.313 | 0.016        |
| Slc4a4    | solute carrier family 4, sodium bicarbonate cotransporter, member 4                              | -0.353 | 0.025 | -0.464 | 0.001        | 0.015  | 0.024        |
| Mitf      | microphthalmia-associated transcription factor                                                   | -0.353 | 0.040 | -0.119 | <b>0.770</b> | -0.157 | <b>0.791</b> |
| Il11ra1   | interleukin 11 receptor, alpha chain 1                                                           | -0.354 | 0.031 | 0.040  | <b>0.677</b> | -0.070 | <b>0.749</b> |
| Mxra8     | matrix-remodelling associated 8                                                                  | -0.354 | 0.035 | 0.082  | <b>0.768</b> | 0.052  | <b>0.667</b> |
| Qsox2     | quiescin Q6 sulfhydryl oxidase 2                                                                 | -0.354 | 0.039 | -0.247 | <b>0.905</b> | -0.187 | <b>0.848</b> |
| Cntnap1   | contactin associated protein 1                                                                   | -0.354 | 0.039 | 0.166  | <b>0.895</b> | 0.090  | <b>0.816</b> |
| LOC689796 | hypothetical protein LOC689796                                                                   | -0.355 | 0.032 | -0.394 | 0.020        | -0.363 | 0.025        |
| Maged1    | melanoma antigen, family D, 1                                                                    | -0.355 | 0.041 | -0.320 | 0.024        | -0.248 | <b>0.682</b> |
| Rpp25     | ribonuclease P 25 subunit (human)                                                                | -0.355 | 0.034 | -0.166 | <b>0.838</b> | -0.218 | <b>0.871</b> |
| Hrasls    | HRAS-like suppressor                                                                             | -0.355 | 0.036 | -0.146 | <b>0.515</b> | -0.157 | <b>0.667</b> |
| Ccz1      | CCZ1 vacuolar protein trafficking and biogenesis associated homolog (S. cerevisiae)              | -0.356 | 0.045 | -0.330 | 0.034        | -0.068 | <b>0.634</b> |
| Nit2      | nitrilase family, member 2                                                                       | -0.356 | 0.009 | -0.042 | <b>0.293</b> | -0.087 | <b>0.294</b> |
| Psbpc2    | prostatic steroid-binding protein C2                                                             | -0.357 | 0.037 | -0.233 | <b>0.903</b> | -0.002 | <b>0.518</b> |
| Vamp1     | vesicle-associated membrane protein 1                                                            | -0.357 | 0.032 | 0.200  | <b>0.946</b> | 0.121  | <b>0.811</b> |
| Hsf2bp    | heat shock transcription factor 2 binding protein                                                | -0.357 | 0.043 | -0.145 | <b>0.696</b> | 0.114  | <b>0.579</b> |
| Hsd17b1   | hydroxysteroid (17-beta) dehydrogenase 1                                                         | -0.357 | 0.029 | -0.100 | <b>0.860</b> | -0.204 | <b>0.947</b> |
| Lppr3     | lipid phosphate phosphatase-related protein type 3                                               | -0.357 | 0.042 | 0.108  | <b>0.609</b> | -0.012 | <b>0.549</b> |
| Pdzn3     | PDZ domain containing RING finger 3                                                              | -0.358 | 0.046 | 0.027  | <b>0.488</b> | -0.110 | <b>0.657</b> |
| Paqr6     | progesterin and adipoQ receptor family member VI                                                 | -0.358 | 0.049 | -0.031 | <b>0.681</b> | -0.053 | <b>0.733</b> |
| Thra      | thyroid hormone receptor alpha                                                                   | -0.358 | 0.050 | -0.087 | <b>0.734</b> | 0.044  | <b>0.618</b> |
| Npr1      | natriuretic peptide receptor A/guanylate cyclase A (atriuretic peptide receptor A)               | -0.358 | 0.043 | 0.082  | <b>0.750</b> | -0.027 | <b>0.500</b> |
| Crtap     | cartilage associated protein                                                                     | -0.358 | 0.029 | -0.128 | <b>0.625</b> | -0.668 | 0.000        |
| Egfl8     | EGF-like-domain, multiple 8                                                                      | -0.359 | 0.039 | -0.128 | <b>0.926</b> | -0.180 | <b>0.954</b> |
| LOC682105 | similar to receptor expression enhancing protein 2                                               | -0.359 | 0.036 | 0.254  | <b>0.926</b> | 0.038  | <b>0.541</b> |
| Serp1     | stress-associated endoplasmic reticulum protein 1                                                | -0.359 | 0.041 | -0.196 | <b>0.541</b> | -0.117 | <b>0.418</b> |
| Lgals9    | lectin, galactoside-binding, soluble, 9                                                          | -0.359 | 0.034 | -0.197 | <b>0.857</b> | -0.114 | <b>0.758</b> |
| Olr931    | olfactory receptor 931                                                                           | -0.359 | 0.026 | -0.596 | 0.003        | -0.431 | 0.011        |
| Tesc      | tescalcin                                                                                        | -0.359 | 0.028 | -0.163 | <b>0.676</b> | 0.158  | <b>0.198</b> |
| Gap43     | growth associated protein 43                                                                     | -0.360 | 0.038 | 0.163  | <b>0.811</b> | -0.006 | <b>0.394</b> |
| Rerg      | RAS-like, estrogen-regulated, growth-inhibitor                                                   | -0.360 | 0.028 | -0.303 | 0.036        | -0.198 | <b>0.874</b> |
| Gosr2     | golgi SNAP receptor complex member 2                                                             | -0.360 | 0.043 | -0.165 | <b>0.889</b> | -0.081 | <b>0.759</b> |
| Smtnl2    | smoothelin-like 2                                                                                | -0.360 | 0.039 | -0.095 | <b>0.753</b> | -0.113 | <b>0.785</b> |
| Sqrdl     | sulfide quinone reductase-like (yeast)                                                           | -0.360 | 0.041 | -0.240 | 0.025        | -0.028 | <b>0.248</b> |
| Ly49i4    | Ly49 inhibitory receptor 4                                                                       | -0.360 | 0.029 | -0.054 | <b>0.279</b> | -0.164 | <b>0.441</b> |
| Galnt11   | UDP-N-acetyl-alpha-D-galactosamine:polypeptide N-acetylgalactosaminyltransferase 11 (GalNAc-T11) | -0.360 | 0.043 | -0.037 | <b>0.644</b> | -0.145 | <b>0.874</b> |
| Slc7a14   | solute carrier family 7 (cationic amino acid transporter, y+ system), member 14                  | -0.360 | 0.019 | 0.119  | <b>0.882</b> | 0.023  | <b>0.524</b> |
| Nrxn2     | neurexin 2                                                                                       | -0.361 | 0.045 | -0.209 | <b>0.805</b> | -0.179 | <b>0.725</b> |
| Tlr3      | toll-like receptor 3                                                                             | -0.361 | 0.039 | -0.163 | <b>0.363</b> | -0.198 | <b>0.460</b> |
| Zfp758    | zinc finger protein 758                                                                          | -0.361 | 0.044 | -0.234 | <b>0.808</b> | -0.259 | <b>0.777</b> |
| S1pr5     | sphingosine-1-phosphate receptor 5                                                               | -0.361 | 0.042 | -0.329 | 0.029        | -0.135 | <b>0.641</b> |
| Klhl23    | kelch-like 23 (Drosophila)                                                                       | -0.361 | 0.047 | -0.258 | <b>0.969</b> | -0.054 | <b>0.531</b> |
| Angptl3   | angiopoietin-like 3                                                                              | -0.362 | 0.044 | -0.414 | 0.015        | -0.348 | <b>0.958</b> |
| Cldn23    | claudin 23                                                                                       | -0.362 | 0.028 | -0.283 | 0.037        | -0.078 | <b>0.401</b> |
| Lgals5    | lectin, galactose binding, soluble 5                                                             | -0.362 | 0.027 | -0.143 | <b>0.736</b> | -0.152 | <b>0.831</b> |
| Cdh11     | cadherin 11                                                                                      | -0.362 | 0.035 | 0.033  | <b>0.671</b> | 0.051  | <b>0.655</b> |
| Rab44     | RAB44, member RAS oncogene family                                                                | -0.362 | 0.036 | -0.402 | 0.012        | -0.119 | <b>0.193</b> |

|              |                                                                                                      |        |       |        |              |        |              |
|--------------|------------------------------------------------------------------------------------------------------|--------|-------|--------|--------------|--------|--------------|
| Cyp4b1       | cytochrome P450, family 4, subfamily b, polypeptide 1                                                | -0.363 | 0.025 | -0.293 | 0.037        | -0.187 | <b>0.496</b> |
| Grin1        | glutamate receptor, ionotropic, N-methyl D-aspartate 1                                               | -0.363 | 0.039 | -0.156 | <b>0.909</b> | 0.008  | <b>0.403</b> |
| Pla2g7       | phospholipase A2, group VII (platelet-activating factor acetylhydrolase, plasma)                     | -0.363 | 0.040 | -0.120 | <b>0.892</b> | -0.028 | <b>0.493</b> |
| Ptpn7        | protein tyrosine phosphatase, non-receptor type 7                                                    | -0.363 | 0.014 | 0.323  | 0.028        | 0.514  | 0.003        |
| Ptprd        | protein tyrosine phosphatase, receptor type, D                                                       | -0.363 | 0.025 | -0.347 | 0.021        | -0.117 | <b>0.432</b> |
| Smpd4        | sphingomyelin phosphodiesterase 4, neutral membrane                                                  | -0.363 | 0.021 | 0.018  | <b>0.283</b> | -0.454 | 0.005        |
| Slc8a1       | solute carrier family 8 (sodium/calcium exchanger), member 1                                         | -0.363 | 0.042 | 0.125  | <b>0.775</b> | 0.153  | <b>0.775</b> |
| LOC685577    | similar to major urinary protein 5                                                                   | -0.363 | 0.022 | -0.150 | <b>0.893</b> | -0.161 | <b>0.935</b> |
| Prss12       | protease, serine, 12 neurotrypsin (motopsin)                                                         | -0.364 | 0.041 | -0.167 | <b>0.741</b> | -0.065 | <b>0.432</b> |
| Pi16         | peptidase inhibitor 16                                                                               | -0.364 | 0.040 | -0.207 | <b>0.785</b> | -0.252 | <b>0.833</b> |
| Cpb2         | carboxypeptidase B2 (plasma)                                                                         | -0.365 | 0.040 | -0.308 | <b>0.962</b> | -0.292 | <b>0.953</b> |
| LOC680758    | similar to spermatogenesis associated glutamate (E)-rich protein 4d                                  | -0.365 | 0.037 | -0.133 | <b>0.677</b> | -0.317 | <b>0.925</b> |
| Sycp2        | synaptonemal complex protein 2                                                                       | -0.365 | 0.034 | -0.093 | <b>0.842</b> | -0.034 | <b>0.751</b> |
| Pcp4l1       | Purkinje cell protein 4-like 1                                                                       | -0.365 | 0.029 | -0.047 | <b>0.676</b> | -0.257 | <b>0.951</b> |
| Npl          | N-acetylneuraminase pyruvate lyase                                                                   | -0.365 | 0.041 | 0.058  | <b>0.601</b> | -0.025 | <b>0.432</b> |
| Sepx1        | selenoprotein X, 1                                                                                   | -0.365 | 0.039 | 0.064  | <b>0.673</b> | -0.145 | <b>0.908</b> |
| Slc16a12     | solute carrier family 16, member 12 (monocarboxylic acid transporter 12)                             | -0.365 | 0.038 | -0.240 | <b>0.972</b> | -0.269 | <b>0.964</b> |
| Ak1          | adenylate kinase 1                                                                                   | -0.366 | 0.036 | -0.025 | <b>0.346</b> | -0.006 | <b>0.395</b> |
| Rab3c        | RAB3C, member RAS oncogene family                                                                    | -0.366 | 0.038 | -0.124 | <b>0.841</b> | -0.109 | <b>0.794</b> |
| MGC116197    | similar to RIKEN cDNA 1700001E04                                                                     | -0.366 | 0.030 | 0.160  | <b>0.742</b> | 0.137  | <b>0.821</b> |
| Tubb2a       | tubulin, beta 2A class IIa                                                                           | -0.366 | 0.042 | -0.212 | <b>0.907</b> | -0.405 | 0.013        |
| Prlr         | prolactin receptor                                                                                   | -0.366 | 0.017 | -0.407 | 0.008        | -0.289 | 0.008        |
| Grip2        | glutamate receptor interacting protein 2                                                             | -0.367 | 0.026 | -0.078 | <b>0.729</b> | -0.053 | <b>0.657</b> |
| RGD1306001   | similar to 2210021J22Rik protein                                                                     | -0.367 | 0.025 | -0.192 | 0.039        | -0.198 | 0.026        |
| Ucp3         | uncoupling protein 3 (mitochondrial, proton carrier)                                                 | -0.367 | 0.040 | -0.231 | <b>0.917</b> | -0.193 | <b>0.900</b> |
| Pcolce       | procollagen C-endopeptidase enhancer                                                                 | -0.367 | 0.023 | 0.160  | <b>0.877</b> | 0.059  | <b>0.712</b> |
| Coro6        | coronin 6                                                                                            | -0.368 | 0.049 | -0.100 | <b>0.522</b> | -0.057 | <b>0.416</b> |
| Mrps2        | mitochondrial ribosomal protein S2                                                                   | -0.368 | 0.034 | -0.116 | <b>0.792</b> | -0.120 | <b>0.790</b> |
| Srd5a1       | steroid-5-alpha-reductase, alpha polypeptide 1 (3-oxo-5 alpha-steroid delta 4-dehydrogenase alpha 1) | -0.368 | 0.037 | -0.354 | 0.006        | -0.148 | 0.033        |
| Chrna10      | cholinergic receptor, nicotinic, alpha 10                                                            | -0.368 | 0.046 | -0.286 | <b>0.752</b> | -0.231 | <b>0.589</b> |
| Oaf          | OAF homolog (Drosophila)                                                                             | -0.368 | 0.033 | 0.054  | <b>0.671</b> | -0.135 | <b>0.789</b> |
| Ppp1r14a     | protein phosphatase 1, regulatory (inhibitor) subunit 14A                                            | -0.368 | 0.041 | 0.006  | <b>0.596</b> | -0.012 | <b>0.565</b> |
| LOC100363621 | hypothetical protein LOC100363621                                                                    | -0.368 | 0.029 | -0.006 | <b>0.280</b> | -0.073 | <b>0.323</b> |
| Slc2a10      | solute carrier family 2 (facilitated glucose transporter), member 10                                 | -0.368 | 0.040 | -0.353 | 0.009        | -0.333 | 0.021        |
| Egr1         | early growth response 1                                                                              | -0.368 | 0.022 | -0.378 | 0.011        | -0.826 | 0.000        |
| Hcrtr1       | hypocretin (orexin) receptor 1                                                                       | -0.368 | 0.033 | -0.132 | <b>0.922</b> | -0.016 | <b>0.625</b> |
| Klhdc8b      | kelch domain containing 8B                                                                           | -0.368 | 0.045 | 0.126  | <b>0.737</b> | 0.068  | <b>0.629</b> |
| Bambi        | BMP and activin membrane-bound inhibitor, homolog (Xenopus laevis)                                   | -0.368 | 0.030 | -0.125 | <b>0.913</b> | 0.024  | <b>0.728</b> |
| Wfdc15b      | WAP four-disulfide core domain 15B                                                                   | -0.369 | 0.029 | 0.075  | <b>0.607</b> | 0.232  | <b>0.929</b> |
| Atp1b2       | ATPase, Na <sup>+</sup> /K <sup>+</sup> transporting, beta 2 polypeptide                             | -0.369 | 0.036 | 0.251  | <b>0.930</b> | 0.220  | <b>0.941</b> |
| LOC686921    | hypothetical protein LOC686921                                                                       | -0.369 | 0.025 | 0.139  | <b>0.565</b> | 0.042  | <b>0.384</b> |
| Kcnf1        | potassium voltage-gated channel, subfamily F, member 1                                               | -0.369 | 0.031 | -0.278 | <b>0.916</b> | -0.497 | 0.004        |
| P2rx2        | purinergic receptor P2X, ligand-gated ion channel, 2                                                 | -0.369 | 0.026 | -0.229 | <b>0.576</b> | -0.291 | <b>0.680</b> |
| Gpx1         | glutathione peroxidase 1                                                                             | -0.369 | 0.047 | -0.054 | <b>0.549</b> | -0.070 | <b>0.599</b> |
| Ly6h         | lymphocyte antigen 6 complex, locus H                                                                | -0.370 | 0.048 | 0.020  | <b>0.413</b> | -0.268 | <b>0.818</b> |
| Lppr4        | lipid phosphate phosphatase-related protein type 4                                                   | -0.370 | 0.038 | 0.026  | <b>0.471</b> | -0.019 | <b>0.363</b> |
| Slc35a2      | solute carrier family 35 (UDP-galactose transporter), member A2                                      | -0.370 | 0.018 | 0.072  | <b>0.572</b> | 0.024  | <b>0.647</b> |
| RGD1562963   | similar to chromosome 6 open reading frame 52                                                        | -0.371 | 0.040 | -0.427 | 0.013        | -0.354 | 0.026        |
| Adamdec1     | ADAM-like, decysin 1                                                                                 | -0.371 | 0.014 | 0.267  | <b>0.953</b> | 0.053  | <b>0.630</b> |

|            |                                                                    |        |       |        |              |        |              |
|------------|--------------------------------------------------------------------|--------|-------|--------|--------------|--------|--------------|
| LOC685808  | similar to transmembrane NK cell receptor 2B4                      | -0.371 | 0.029 | 0.187  | <b>0.737</b> | 0.365  | 0.026        |
| Tmem213    | transmembrane protein 213                                          | -0.371 | 0.027 | -0.276 | <b>0.911</b> | -0.140 | <b>0.774</b> |
| Crelid2    | cysteine-rich with EGF-like domains 2                              | -0.372 | 0.034 | 0.109  | <b>0.186</b> | 0.184  | <b>0.803</b> |
| Capn6      | calpain 6                                                          | -0.372 | 0.012 | 0.390  | 0.016        | 0.132  | <b>0.564</b> |
| Kctd15     | potassium channel tetramerisation domain containing 15             | -0.372 | 0.028 | 0.124  | <b>0.794</b> | -0.170 | <b>0.823</b> |
| Slc22a17   | solute carrier family 22, member 17                                | -0.372 | 0.034 | 0.154  | <b>0.925</b> | 0.133  | <b>0.898</b> |
| LOC689757  | similar to osteoclast inhibitory lectin                            | -0.372 | 0.033 | -0.313 | 0.035        | -0.187 | <b>0.650</b> |
| Gpr171     | G protein-coupled receptor 171                                     | -0.372 | 0.008 | 0.225  | <b>0.516</b> | 0.277  | <b>0.603</b> |
| Dab2       | disabled homolog 2 (Drosophila)                                    | -0.372 | 0.041 | 0.077  | <b>0.554</b> | 0.021  | <b>0.488</b> |
| Mdp1       | magnesium-dependent phosphatase 1                                  | -0.373 | 0.032 | -0.336 | 0.031        | -0.298 | <b>0.987</b> |
| Nsdhl      | NAD(P) dependent steroid dehydrogenase-like                        | -0.373 | 0.027 | -0.187 | <b>0.911</b> | -0.127 | <b>0.791</b> |
| Syt16      | synaptotagmin XVI                                                  | -0.373 | 0.028 | -0.206 | <b>0.636</b> | -0.243 | <b>0.640</b> |
| Clcf1      | cardiotrophin-like cytokine factor 1                               | -0.373 | 0.041 | -0.175 | <b>0.616</b> | -0.004 | <b>0.288</b> |
| RT1-N1     | RT1 class Ib, locus N1                                             | -0.373 | 0.047 | 0.085  | <b>0.336</b> | -0.013 | <b>0.359</b> |
| Atp2b3     | ATPase, Ca <sup>++</sup> transporting, plasma membrane 3           | -0.374 | 0.028 | -0.144 | <b>0.564</b> | -0.342 | 0.025        |
| Nqo1       | NAD(P)H dehydrogenase, quinone 1                                   | -0.374 | 0.038 | 0.037  | <b>0.084</b> | -0.108 | <b>0.247</b> |
| Spata24    | spermatogenesis associated 24                                      | -0.374 | 0.037 | -0.123 | <b>0.727</b> | 0.070  | <b>0.783</b> |
| Ly49i6     | Ly49 inhibitory receptor 6                                         | -0.374 | 0.021 | -0.212 | <b>0.830</b> | 0.202  | <b>0.852</b> |
| Tm6sf1     | transmembrane 6 superfamily member 1                               | -0.374 | 0.040 | -0.079 | <b>0.714</b> | -0.022 | <b>0.557</b> |
| Gfra2      | GDNF family receptor alpha 2                                       | -0.374 | 0.036 | 0.080  | <b>0.696</b> | 0.111  | <b>0.748</b> |
| Thbs1      | thrombospondin 1                                                   | -0.374 | 0.039 | -0.380 | 0.024        | -0.577 | 0.002        |
| Bcat1      | branched chain amino acid transaminase 1, cytosolic                | -0.375 | 0.031 | 0.064  | <b>0.811</b> | 0.059  | <b>0.773</b> |
| Ngb        | neuroglobin                                                        | -0.375 | 0.029 | 0.287  | 0.013        | 0.141  | 0.039        |
| RGD1309676 | similar to RIKEN cDNA 5730469M10                                   | -0.375 | 0.035 | -0.175 | <b>0.650</b> | 0.000  | <b>0.440</b> |
| Trpc1      | transient receptor potential cation channel, subfamily C, member 1 | -0.375 | 0.033 | -0.332 | 0.027        | -0.482 | 0.005        |
| Rassf9     | Ras association (RalGDS/AF-6) domain family (N-terminal) member 9  | -0.375 | 0.038 | -0.134 | <b>0.875</b> | -0.141 | <b>0.882</b> |
| Amica1     | adhesion molecule, interacts with CXADR antigen 1                  | -0.376 | 0.036 | 0.213  | <b>0.906</b> | 0.296  | 0.050        |
| Fa2h       | fatty acid 2-hydroxylase                                           | -0.376 | 0.024 | -0.377 | 0.012        | -0.291 | <b>0.661</b> |
| Csrnp3     | cysteine-serine-rich nuclear protein 3                             | -0.376 | 0.030 | -0.212 | <b>0.610</b> | -0.010 | <b>0.215</b> |
| Dusp8      | dual specificity phosphatase 8                                     | -0.377 | 0.029 | -0.336 | 0.029        | -0.455 | 0.005        |
| Pde2a      | phosphodiesterase 2A, cGMP-stimulated                              | -0.377 | 0.026 | -0.279 | 0.035        | -0.253 | <b>0.685</b> |
| LOC684652  | hypothetical protein LOC684652                                     | -0.377 | 0.017 | -0.196 | <b>0.412</b> | -0.383 | 0.009        |
| Ly6e       | lymphocyte antigen 6 complex, locus E                              | -0.378 | 0.038 | 0.055  | <b>0.311</b> | 0.074  | <b>0.374</b> |
| Ppp2r2b    | protein phosphatase 2, regulatory subunit B, beta                  | -0.378 | 0.029 | -0.006 | <b>0.360</b> | -0.105 | <b>0.521</b> |
| Tarbp2     | TAR (HIV-1) RNA binding protein 2                                  | -0.378 | 0.037 | -0.432 | 0.010        | -0.303 | <b>0.933</b> |
| Dbn1       | drebrin 1                                                          | -0.378 | 0.033 | 0.049  | <b>0.752</b> | 0.009  | <b>0.673</b> |
| Fgf13      | fibroblast growth factor 13                                        | -0.378 | 0.014 | 0.132  | <b>0.669</b> | 0.013  | <b>0.644</b> |
| Senp5      | Sumo1/sentrin/SMT3 specific peptidase 5                            | -0.379 | 0.038 | -0.022 | <b>0.264</b> | -0.185 | <b>0.518</b> |
| Hdgfrp3    | hepatoma-derived growth factor, related protein 3                  | -0.379 | 0.035 | -0.139 | <b>0.861</b> | -0.164 | <b>0.887</b> |
| Klrc3      | killer cell lectin-like receptor subfamily C, member 3             | -0.379 | 0.032 | 0.075  | <b>0.746</b> | 0.473  | 0.005        |
| Hus1       | HUS1 checkpoint homolog (S. pombe)                                 | -0.380 | 0.012 | 0.468  | 0.004        | 0.167  | <b>0.705</b> |
| LOC679566  | hypothetical protein LOC679566                                     | -0.380 | 0.021 | 0.040  | <b>0.099</b> | -0.164 | <b>0.058</b> |
| Mmd        | monocyte to macrophage differentiation-associated                  | -0.380 | 0.036 | -0.111 | <b>0.785</b> | 0.024  | <b>0.539</b> |
| Plekhn1    | pleckstrin homology domain containing, family N member 1           | -0.380 | 0.026 | 0.105  | <b>0.684</b> | 0.117  | <b>0.737</b> |
| Dcx        | doublecortin                                                       | -0.380 | 0.031 | 0.337  | 0.012        | 0.079  | <b>0.521</b> |
| Lsp1       | lymphocyte-specific protein 1                                      | -0.380 | 0.019 | 0.205  | <b>0.801</b> | 0.072  | <b>0.502</b> |
| Clec4a1    | C-type lectin domain family 4, member A1                           | -0.381 | 0.031 | -0.040 | <b>0.588</b> | 0.249  | <b>0.954</b> |
| Btnl5      | butyrophilin-like 5                                                | -0.381 | 0.026 | 0.169  | <b>0.339</b> | 0.420  | 0.007        |
| Mmp10      | matrix metalloproteinase 10                                        | -0.381 | 0.012 | 0.114  | <b>0.405</b> | 0.557  | 0.001        |
| Acsm4      | acyl-CoA synthetase medium-chain family member 4                   | -0.382 | 0.017 | -0.087 | <b>0.161</b> | 0.328  | 0.006        |
| Ipcef1     | interactor protein for cytohesin exchange factors 1                | -0.382 | 0.020 | -0.269 | <b>0.957</b> | -0.115 | <b>0.539</b> |
| Espl1      | extra spindle pole bodies homolog 1 (S. cerevisiae)                | -0.382 | 0.024 | -0.451 | 0.007        | -0.221 | <b>0.892</b> |
| Gulp1      | GULP, engulfment adaptor PTB domain containing 1                   | -0.382 | 0.031 | -0.082 | <b>0.804</b> | -0.124 | <b>0.878</b> |
| Pcgf1      | polycomb group ring finger 1                                       | -0.383 | 0.025 | 0.007  | <b>0.589</b> | 0.126  | <b>0.739</b> |
| Myef2      | myelin expression factor 2                                         | -0.383 | 0.032 | -0.078 | <b>0.728</b> | -0.185 | <b>0.889</b> |

|            |                                                                                 |        |       |        |              |        |              |
|------------|---------------------------------------------------------------------------------|--------|-------|--------|--------------|--------|--------------|
| Pde1b      | phosphodiesterase 1B, calmodulin-dependent                                      | -0.383 | 0.032 | -0.029 | <b>0.549</b> | 0.073  | <b>0.503</b> |
| RGD1564387 | similar to RIKEN cDNA C030014K22 gene                                           | -0.383 | 0.038 | -0.114 | <b>0.739</b> | -0.188 | <b>0.802</b> |
| Gabbr1     | gamma-aminobutyric acid (GABA) B receptor 1                                     | -0.384 | 0.028 | 0.344  | <b>0.881</b> | 0.176  | <b>0.636</b> |
| LOC679566  | hypothetical protein LOC679566                                                  | -0.384 | 0.016 | 0.112  | <b>0.069</b> | -0.198 | 0.040        |
| Cmtm8      | CKLF-like MARVEL transmembrane domain containing 8                              | -0.384 | 0.034 | -0.364 | 0.019        | -0.242 | <b>0.863</b> |
| Rab5c      | RAB5C, member RAS oncogene family                                               | -0.384 | 0.046 | -0.296 | 0.021        | -0.325 | <b>0.907</b> |
| RGD1565046 | similar to CLM6                                                                 | -0.384 | 0.030 | -0.039 | <b>0.686</b> | -0.081 | <b>0.791</b> |
| Stx2       | syntaxin 2                                                                      | -0.384 | 0.033 | -0.133 | <b>0.919</b> | -0.117 | <b>0.837</b> |
| Gm5d       | GDP-mannose 4, 6-dehydratase                                                    | -0.384 | 0.029 | -0.422 | 0.007        | -0.225 | <b>0.710</b> |
| Tmed3      | transmembrane emp24 protein transport domain containing 3                       | -0.384 | 0.026 | -0.420 | 0.011        | -0.181 | <b>0.812</b> |
| Aqp4       | aquaporin 4                                                                     | -0.384 | 0.008 | -0.351 | 0.008        | -0.220 | <b>0.936</b> |
| Mmp7       | matrix metalloproteinase 7                                                      | -0.384 | 0.032 | -0.202 | <b>0.930</b> | -0.266 | <b>0.966</b> |
| Gdnf       | glial cell derived neurotrophic factor                                          | -0.385 | 0.029 | 0.337  | 0.011        | -0.259 | <b>0.368</b> |
| Gria4      | glutamate receptor, ionotropic, AMPA 4                                          | -0.385 | 0.031 | -0.073 | <b>0.673</b> | -0.080 | <b>0.735</b> |
| Sema6d     | sema domain, transmembrane domain (TM), and cytoplasmic domain, (semaphorin) 6D | -0.385 | 0.041 | 0.132  | <b>0.653</b> | -0.098 | <b>0.402</b> |
| Alox5ap    | arachidonate 5-lipoxygenase activating protein                                  | -0.385 | 0.022 | -0.009 | <b>0.671</b> | 0.077  | <b>0.811</b> |
| LOC686539  | similar to immunoglobulin superfamily containing leucine-rich repeat            | -0.385 | 0.032 | -0.087 | <b>0.816</b> | -0.048 | <b>0.707</b> |
| Bok        | BCL2-related ovarian killer                                                     | -0.385 | 0.035 | -0.422 | 0.014        | -0.297 | <b>0.966</b> |
| Higd1b     | HIG1 hypoxia inducible domain family, member 1B                                 | -0.385 | 0.003 | -0.325 | 0.005        | -0.484 | 0.002        |
| Pacrg      | Park2 co-regulated                                                              | -0.385 | 0.029 | 0.209  | <b>0.633</b> | 0.133  | <b>0.570</b> |
| Mogat1     | monoacylglycerol O-acyltransferase 1                                            | -0.385 | 0.031 | -0.101 | <b>0.752</b> | -0.160 | <b>0.828</b> |
| Rap1gap    | Rap1 GTPase-activating protein                                                  | -0.386 | 0.036 | -0.490 | 0.001        | -0.336 | 0.001        |
| Tle2       | transducin-like enhancer of split 2 (E(sp1) homolog, Drosophila)                | -0.386 | 0.019 | 0.164  | <b>0.927</b> | 0.063  | <b>0.618</b> |
| Zfp57      | zinc finger protein 57                                                          | -0.386 | 0.030 | -0.240 | <b>0.898</b> | -0.313 | <b>0.966</b> |
| Il34       | interleukin 34                                                                  | -0.386 | 0.031 | -0.243 | <b>0.905</b> | -0.297 | <b>0.978</b> |
| Mpp4       | membrane protein, palmitoylated 4 (MAGUK p55 subfamily member 4)                | -0.387 | 0.035 | 0.119  | <b>0.787</b> | 0.120  | <b>0.768</b> |
| Lrrn2      | leucine rich repeat neuronal 2                                                  | -0.387 | 0.028 | -0.004 | <b>0.469</b> | -0.109 | <b>0.698</b> |
| Rassf4     | Ras association (RalGDS/AF-6) domain family member 4                            | -0.387 | 0.018 | -0.445 | 0.005        | -0.319 | 0.021        |
| LOC367390  | hypothetical LOC367390                                                          | -0.387 | 0.019 | -0.330 | 0.030        | -0.388 | 0.013        |
| Inhbe      | inhibin beta E                                                                  | -0.387 | 0.043 | -0.416 | 0.015        | -0.087 | <b>0.524</b> |
| Sdc2       | syndecan 2                                                                      | -0.387 | 0.018 | 0.029  | <b>0.550</b> | -0.209 | <b>0.894</b> |
| Lphn3      | latrophilin 3                                                                   | -0.388 | 0.037 | 0.189  | <b>0.761</b> | 0.177  | <b>0.685</b> |
| Nsg1       | neuron specific gene family member 1                                            | -0.388 | 0.018 | 0.044  | <b>0.433</b> | 0.023  | <b>0.554</b> |
| Mettl7a    | methyltransferase like 7A                                                       | -0.388 | 0.031 | -0.208 | <b>0.796</b> | 0.047  | <b>0.370</b> |
| Rnf207     | ring finger protein 207                                                         | -0.388 | 0.027 | -0.047 | <b>0.733</b> | 0.030  | <b>0.726</b> |
| LOC498276  | Fc gamma receptor II beta                                                       | -0.389 | 0.018 | 0.180  | <b>0.891</b> | 0.063  | <b>0.604</b> |
| Insc       | inscuteable homolog (Drosophila)                                                | -0.389 | 0.019 | -0.081 | <b>0.716</b> | -0.082 | <b>0.723</b> |
| Lrrc38     | leucine rich repeat containing 38                                               | -0.389 | 0.035 | -0.110 | <b>0.390</b> | -0.042 | <b>0.398</b> |
| Igfbp5     | insulin-like growth factor binding protein 5                                    | -0.390 | 0.007 | 0.381  | 0.019        | 0.092  | <b>0.726</b> |
| St3gal3    | ST3 beta-galactoside alpha-2,3-sialyltransferase 3                              | -0.390 | 0.039 | -0.635 | 0.001        | -0.635 | 0.001        |
| Scn7a      | sodium channel, voltage-gated, type VII, alpha                                  | -0.391 | 0.029 | 0.050  | <b>0.488</b> | -0.039 | <b>0.345</b> |
| Vom2r5     | vomerolateral 2 receptor, 5                                                     | -0.391 | 0.031 | -0.112 | <b>0.577</b> | 0.084  | <b>0.244</b> |
| Cabp2      | calcium binding protein 2                                                       | -0.391 | 0.028 | -0.317 | 0.022        | -0.232 | <b>0.895</b> |
| RGD1562674 | similar to kinase suppressor of ras 2                                           | -0.391 | 0.043 | -0.361 | 0.036        | 0.075  | <b>0.148</b> |
| Sik1       | salt-inducible kinase 1                                                         | -0.391 | 0.021 | -0.673 | 0.001        | -0.707 | 0.001        |
| Crtap      | cartilage associated protein                                                    | -0.392 | 0.032 | -0.402 | 0.011        | -0.318 | <b>0.911</b> |
| Acta2      | smooth muscle alpha-actin                                                       | -0.392 | 0.027 | -0.115 | <b>0.911</b> | -0.223 | <b>0.945</b> |
| O3far1     | omega-3 fatty acid receptor 1                                                   | -0.392 | 0.025 | -0.540 | 0.001        | -0.355 | 0.019        |
| Tlr7       | toll-like receptor 7                                                            | -0.392 | 0.028 | 0.136  | <b>0.683</b> | 0.238  | <b>0.710</b> |
| Pxdc1      | PX domain containing 1                                                          | -0.392 | 0.019 | -0.231 | <b>0.667</b> | -0.140 | <b>0.481</b> |
| Vof16      | ischemia related factor vof-16                                                  | -0.392 | 0.038 | 0.204  | <b>0.055</b> | 0.096  | <b>0.441</b> |
| Epgn       | epithelial mitogen homolog (mouse)                                              | -0.393 | 0.033 | -0.243 | <b>0.799</b> | -0.472 | 0.009        |
| Tmed4      | transmembrane emp24 protein transport domain containing 4                       | -0.393 | 0.033 | -0.278 | <b>0.677</b> | -0.422 | 0.008        |
| Myh2       | myosin, heavy chain 2, skeletal muscle, adult                                   | -0.393 | 0.006 | -0.534 | 0.005        | -0.648 | 0.002        |
| Cxcr7      | chemokine (C-X-C motif) receptor 7                                              | -0.393 | 0.018 | -0.327 | 0.029        | -0.650 | 0.000        |
| Epor       | erythropoietin receptor                                                         | -0.394 | 0.030 | 0.277  | <b>0.937</b> | 0.132  | <b>0.703</b> |
| Glt8d1     | glycosyltransferase 8 domain containing 1                                       | -0.395 | 0.028 | -0.122 | <b>0.890</b> | -0.029 | <b>0.550</b> |
| MGC116197  | similar to RIKEN cDNA 1700001E04                                                | -0.395 | 0.027 | 0.005  | <b>0.506</b> | -0.231 | <b>0.937</b> |
| RGD1563222 | similar to RIKEN cDNA A930018P22                                                | -0.395 | 0.026 | -0.282 | <b>0.939</b> | -0.005 | <b>0.569</b> |

|            |                                                                                                   |        |       |        |              |        |              |
|------------|---------------------------------------------------------------------------------------------------|--------|-------|--------|--------------|--------|--------------|
| Mgst1      | microsomal glutathione S-transferase 1                                                            | -0.395 | 0.013 | -0.046 | <b>0.129</b> | -0.164 | <b>0.216</b> |
| Fam158a    | family with sequence similarity 158, member A                                                     | -0.395 | 0.027 | -0.186 | <b>0.829</b> | -0.027 | <b>0.477</b> |
| Slc12a8    | solute carrier family 12 (potassium/chloride transporters), member 8                              | -0.396 | 0.022 | -0.540 | 0.002        | -0.280 | 0.023        |
| Phlda1     | pleckstrin homology-like domain, family A, member 1                                               | -0.396 | 0.019 | -0.221 | <b>0.906</b> | -0.299 | <b>0.951</b> |
| Rgc32      | response gene to complement 32                                                                    | -0.396 | 0.023 | -0.365 | 0.014        | -0.374 | 0.017        |
| RGD1304731 | similar to RIKEN cDNA 5330437I02 gene                                                             | -0.396 | 0.011 | -0.270 | 0.023        | -0.130 | <b>0.130</b> |
| Mfap5      | microfibrillar associated protein 5                                                               | -0.396 | 0.004 | 0.039  | <b>0.430</b> | -0.157 | <b>0.923</b> |
| Ttyh1      | tweety homolog 1 (Drosophila)                                                                     | -0.396 | 0.032 | -0.181 | <b>0.584</b> | -0.257 | <b>0.760</b> |
| Ccnj       | cyclin J                                                                                          | -0.397 | 0.015 | -0.125 | <b>0.818</b> | -0.078 | <b>0.735</b> |
| Slco3a1    | solute carrier organic anion transporter family, member 3a1                                       | -0.397 | 0.027 | 0.033  | <b>0.698</b> | -0.041 | <b>0.688</b> |
| Dtx3       | deltex homolog 3 (Drosophila)                                                                     | -0.397 | 0.030 | 0.085  | <b>0.831</b> | 0.040  | <b>0.652</b> |
| Sptbn2     | spectrin, beta, non-erythrocytic 2                                                                | -0.397 | 0.028 | -0.074 | <b>0.734</b> | 0.003  | <b>0.610</b> |
| Pla2g1b    | phospholipase A2, group IB, pancreas                                                              | -0.398 | 0.019 | -0.329 | 0.012        | -0.373 | 0.010        |
| Tacstd2    | tumor-associated calcium signal transducer 2                                                      | -0.398 | 0.025 | -0.340 | 0.017        | -0.118 | <b>0.814</b> |
| Arhgdig    | Rho GDP dissociation inhibitor (GDI) gamma                                                        | -0.398 | 0.031 | 0.025  | <b>0.538</b> | -0.139 | <b>0.810</b> |
| Smarcd3    | SWI/SNF related, matrix associated, actin dependent regulator of chromatin, subfamily d, member 3 | -0.398 | 0.031 | 0.049  | <b>0.760</b> | -0.027 | <b>0.514</b> |
| Hapln2     | hyaluronan and proteoglycan link protein 2                                                        | -0.398 | 0.023 | -0.036 | 0.017        | -0.191 | <b>0.605</b> |
| Nxn12      | nucleoredoxin-like 2                                                                              | -0.398 | 0.033 | -0.129 | <b>0.756</b> | -0.107 | <b>0.685</b> |
| Usp18      | ubiquitin specific peptidase 18                                                                   | -0.398 | 0.030 | -0.078 | <b>0.417</b> | 0.003  | <b>0.430</b> |
| Runx3      | runt-related transcription factor 3                                                               | -0.399 | 0.027 | -0.173 | <b>0.747</b> | -0.057 | <b>0.502</b> |
| Cd4        | Cd4 molecule                                                                                      | -0.399 | 0.023 | 0.235  | <b>0.774</b> | 0.150  | <b>0.859</b> |
| Heatr8     | HEAT repeat containing 8                                                                          | -0.399 | 0.018 | 0.060  | <b>0.473</b> | 0.000  | <b>0.323</b> |
| Nupr1      | nuclear protein, transcriptional regulator, 1                                                     | -0.399 | 0.022 | -0.043 | 0.008        | -0.013 | <b>0.209</b> |
| St3gal1    | ST3 beta-galactoside alpha-2,3-sialyltransferase 1                                                | -0.400 | 0.026 | -0.316 | 0.024        | -0.024 | <b>0.601</b> |
| Taar7h     | trace amine-associated receptor 7h                                                                | -0.400 | 0.029 | -0.501 | 0.011        | -0.178 | <b>0.212</b> |
| Spdya      | speedy homolog A (Xenopus laevis)                                                                 | -0.400 | 0.026 | -0.056 | <b>0.341</b> | -0.255 | <b>0.769</b> |
| Gspt2      | G1 to S phase transition 2                                                                        | -0.401 | 0.024 | -0.326 | 0.025        | -0.324 | 0.015        |
| Cabp1      | calcium binding protein 1                                                                         | -0.401 | 0.027 | -0.039 | <b>0.727</b> | -0.203 | <b>0.940</b> |
| Ergic1     | endoplasmic reticulum-golgi intermediate compartment (ERGIC) 1                                    | -0.401 | 0.027 | -0.312 | 0.019        | -0.172 | <b>0.810</b> |
| Fstl3      | follistatin-like 3 (secreted glycoprotein)                                                        | -0.401 | 0.018 | -0.054 | <b>0.691</b> | -0.183 | <b>0.859</b> |
| Ncf4       | neutrophil cytosolic factor 4                                                                     | -0.401 | 0.015 | 0.238  | <b>0.582</b> | 0.233  | <b>0.599</b> |
| Klhl23     | kelch-like 23 (Drosophila)                                                                        | -0.401 | 0.031 | -0.228 | <b>0.929</b> | -0.092 | <b>0.678</b> |
| Cpxm1      | carboxypeptidase X (M14 family), member 1                                                         | -0.402 | 0.022 | 0.252  | <b>0.951</b> | 0.028  | <b>0.636</b> |
| Ikbip      | IKKBK interacting protein                                                                         | -0.402 | 0.021 | -0.198 | 0.039        | -0.198 | 0.036        |
| Gpx4       | glutathione peroxidase 4                                                                          | -0.403 | 0.025 | -0.132 | <b>0.810</b> | -0.051 | <b>0.707</b> |
| Btg3       | BTG family, member 3                                                                              | -0.403 | 0.029 | -0.418 | 0.009        | -0.342 | <b>0.896</b> |
| Igf1       | insulin-like growth factor 1                                                                      | -0.403 | 0.018 | 0.306  | <b>0.953</b> | 0.070  | <b>0.807</b> |
| RGD1565725 | similar to hypothetical protein FLJ23834                                                          | -0.403 | 0.037 | -0.425 | 0.015        | -0.149 | <b>0.252</b> |
| Dlg2       | discs, large homolog 2 (Drosophila)                                                               | -0.404 | 0.025 | 0.036  | <b>0.754</b> | 0.037  | <b>0.784</b> |
| Lman1l     | lectin, mannose-binding, 1 like                                                                   | -0.404 | 0.020 | -0.292 | <b>0.979</b> | -0.062 | <b>0.603</b> |
| Tnnt3      | troponin T type 3 (skeletal, fast)                                                                | -0.404 | 0.023 | 0.319  | <b>0.829</b> | 0.066  | <b>0.541</b> |
| LOC690977  | similar to RIKEN cDNA 5031410I06                                                                  | -0.404 | 0.023 | 0.098  | <b>0.119</b> | -0.151 | <b>0.435</b> |
| Tmigd1     | transmembrane and immunoglobulin domain containing 1                                              | -0.404 | 0.018 | -0.339 | 0.005        | 0.152  | 0.015        |
| Tpd52l1    | tumor protein D52-like 1                                                                          | -0.404 | 0.029 | 0.102  | <b>0.766</b> | 0.032  | <b>0.647</b> |
| Cml3       | camello-like 3                                                                                    | -0.405 | 0.033 | 0.213  | <b>0.849</b> | 0.299  | 0.030        |
| Kcne2      | potassium voltage-gated channel, Isk-related family, member 2                                     | -0.405 | 0.015 | -0.219 | <b>0.767</b> | -0.499 | 0.003        |
| RT1-M1-4   | RT1 class I, locus M1, gene 4                                                                     | -0.405 | 0.024 | -0.324 | <b>0.896</b> | -0.303 | <b>0.814</b> |
| Gpr37l1    | G protein-coupled receptor 37-like 1                                                              | -0.405 | 0.027 | -0.190 | <b>0.952</b> | -0.230 | <b>0.975</b> |
| Lrrc51     | leucine rich repeat containing 51                                                                 | -0.405 | 0.016 | -0.309 | 0.021        | -0.172 | <b>0.920</b> |
| LOC680835  | similar to cullin 7                                                                               | -0.405 | 0.025 | 0.105  | <b>0.862</b> | 0.067  | <b>0.671</b> |
| Rgs18      | regulator of G-protein signaling 18                                                               | -0.406 | 0.029 | -0.067 | <b>0.523</b> | 0.108  | <b>0.584</b> |
| Tnnc2      | troponin C type 2 (fast)                                                                          | -0.406 | 0.001 | -0.312 | 0.021        | -0.465 | 0.006        |
| Ddah2      | dimethylarginine dimethylaminohydrolase 2                                                         | -0.406 | 0.026 | 0.055  | <b>0.716</b> | -0.112 | <b>0.876</b> |
| Sp2        | Sp2 transcription factor                                                                          | -0.407 | 0.031 | -0.420 | 0.006        | 0.006  | <b>0.152</b> |
| Dusp3      | dual specificity phosphatase 3                                                                    | -0.407 | 0.026 | -0.011 | <b>0.542</b> | -0.159 | <b>0.790</b> |
| Pparg      | peroxisome proliferator-activated receptor gamma                                                  | -0.408 | 0.027 | -0.297 | 0.009        | 0.040  | <b>0.199</b> |
| Ndufaf4    | NADH dehydrogenase (ubiquinone) 1 alpha subcomplex, assembly factor 4                             | -0.408 | 0.012 | -0.098 | <b>0.763</b> | -0.105 | <b>0.746</b> |



|              |                                                                                          |        |       |        |              |        |              |
|--------------|------------------------------------------------------------------------------------------|--------|-------|--------|--------------|--------|--------------|
| Cdr2         | cerebellar degeneration-related 2                                                        | -0.408 | 0.033 | -0.281 | <b>0.847</b> | -0.572 | 0.002        |
| Olr594       | olfactory receptor 594                                                                   | -0.409 | 0.021 | -0.158 | <b>0.949</b> | -0.088 | <b>0.685</b> |
| Itgax        | integrin, alpha X                                                                        | -0.410 | 0.040 | -0.146 | <b>0.334</b> | 0.039  | <b>0.391</b> |
| Tpm1         | tropomyosin 1, alpha                                                                     | -0.411 | 0.018 | -0.058 | <b>0.808</b> | -0.133 | <b>0.701</b> |
| Rnd3         | Rho family GTPase 3                                                                      | -0.411 | 0.025 | -0.324 | 0.029        | -0.550 | 0.003        |
| LOC685796    | similar to similar to RIKEN cDNA 1700001E04                                              | -0.411 | 0.027 | 0.142  | <b>0.633</b> | 0.100  | <b>0.634</b> |
| Sema3d       | sema domain, immunoglobulin domain (Ig), short basic domain, secreted, (semaphorin) 3D   | -0.411 | 0.022 | -0.031 | <b>0.717</b> | -0.086 | <b>0.829</b> |
| P2rx4        | purinergic receptor P2X, ligand-gated ion channel 4                                      | -0.411 | 0.024 | -0.266 | 0.035        | -0.248 | <b>0.942</b> |
| Aard         | alanine and arginine rich domain containing protein                                      | -0.412 | 0.016 | 0.129  | <b>0.543</b> | 0.158  | <b>0.756</b> |
| Mrgprf       | MAS-related GPR, member F                                                                | -0.412 | 0.017 | 0.078  | <b>0.604</b> | -0.033 | <b>0.390</b> |
| LOC100364244 | rCG43589-like                                                                            | -0.412 | 0.018 | 0.061  | <b>0.563</b> | 0.085  | <b>0.447</b> |
| Cuzd1        | CUB and zona pellucida-like domains 1                                                    | -0.412 | 0.020 | -0.203 | <b>0.910</b> | -0.269 | <b>0.924</b> |
| Hspa2        | heat shock protein 2                                                                     | -0.412 | 0.010 | -0.102 | <b>0.773</b> | -0.004 | <b>0.539</b> |
| Aebp1        | AE binding protein 1                                                                     | -0.412 | 0.033 | 0.303  | 0.022        | 0.045  | <b>0.550</b> |
| Lcat         | lecithin cholesterol acyltransferase                                                     | -0.412 | 0.017 | 0.213  | <b>0.776</b> | -0.099 | <b>0.675</b> |
| Rimkb        | ribosomal modification protein rimK-like family member B                                 | -0.412 | 0.019 | -0.212 | 0.037        | -0.200 | <b>0.584</b> |
| Zc3h12a      | zinc finger CCCH type containing 12A                                                     | -0.413 | 0.015 | -0.088 | <b>0.656</b> | -0.305 | <b>0.954</b> |
| RGD1565367   | similar to Solute carrier family 23, member 2 (Sodium-dependent vitamin C transporter 2) | -0.413 | 0.030 | 0.106  | <b>0.590</b> | 0.004  | <b>0.341</b> |
| Spock2       | sparc/osteonectin, cwcv and kazal-like domains proteoglycan 2                            | -0.413 | 0.022 | 0.060  | <b>0.595</b> | 0.002  | <b>0.430</b> |
| Kif6         | kinesin family member 6                                                                  | -0.413 | 0.031 | -0.303 | <b>0.910</b> | -0.248 | <b>0.870</b> |
| Olr35        | olfactory receptor 35                                                                    | -0.413 | 0.026 | -0.563 | 0.005        | 0.145  | <b>0.082</b> |
| Ocm          | oncomodulin                                                                              | -0.413 | 0.032 | -0.601 | 0.002        | -0.211 | 0.013        |
| Arf4         | ADP-ribosylation factor 4                                                                | -0.414 | 0.026 | -0.301 | 0.037        | -0.205 | <b>0.898</b> |
| Slc2a4       | solute carrier family 2 (facilitated glucose transporter), member 4                      | -0.415 | 0.012 | -0.032 | <b>0.422</b> | -0.096 | <b>0.518</b> |
| Egf          | epidermal growth factor                                                                  | -0.415 | 0.025 | -0.515 | 0.003        | -0.310 | <b>0.930</b> |
| Cytl1        | cytokine like 1                                                                          | -0.415 | 0.020 | -0.018 | <b>0.658</b> | -0.070 | <b>0.734</b> |
| Gys2         | glycogen synthase 2                                                                      | -0.415 | 0.042 | 0.468  | 0.010        | 0.184  | 0.016        |
| Zfp692       | zinc finger protein 692                                                                  | -0.416 | 0.016 | 0.183  | <b>0.794</b> | 0.258  | <b>0.951</b> |
| Art5         | ADP-ribosyltransferase 5                                                                 | -0.416 | 0.033 | -0.449 | 0.011        | -0.392 | 0.012        |
| Hsd11b1      | hydroxysteroid 11-beta dehydrogenase 1                                                   | -0.417 | 0.015 | -0.054 | <b>0.811</b> | -0.080 | <b>0.809</b> |
| Pfn2         | profilin 2                                                                               | -0.417 | 0.025 | 0.056  | <b>0.557</b> | -0.125 | <b>0.847</b> |
| LOC301748    | similar to RIKEN cDNA 1700001E04                                                         | -0.417 | 0.021 | 0.234  | <b>0.633</b> | 0.229  | <b>0.828</b> |
| Pim3         | pim-3 oncogene                                                                           | -0.417 | 0.018 | -0.410 | 0.013        | -0.541 | 0.002        |
| Folr2        | folate receptor 2 (fetal)                                                                | -0.417 | 0.014 | 0.012  | <b>0.538</b> | -0.127 | <b>0.819</b> |
| Mylk         | myosin light chain kinase                                                                | -0.418 | 0.015 | -0.142 | <b>0.783</b> | -0.289 | <b>0.921</b> |
| Slitrk6      | SLIT and NTRK-like family, member 6                                                      | -0.418 | 0.018 | -0.294 | <b>0.980</b> | -0.344 | 0.023        |
| Uchl1        | ubiquitin carboxyl-terminal esterase L1 (ubiquitin thiolesterase)                        | -0.418 | 0.014 | 0.129  | <b>0.840</b> | 0.042  | <b>0.735</b> |
| LOC686921    | hypothetical protein LOC686921                                                           | -0.419 | 0.020 | 0.136  | <b>0.675</b> | 0.087  | <b>0.688</b> |
| Prrx1        | paired related homeobox 1                                                                | -0.419 | 0.031 | -0.122 | <b>0.594</b> | -0.129 | <b>0.590</b> |
| St3gal4      | ST3 beta-galactoside alpha-2,3-sialyltransferase 4                                       | -0.419 | 0.008 | -0.076 | <b>0.368</b> | -0.478 | 0.003        |
| Scd          | stearoyl-CoA desaturase (delta-9-desaturase)                                             | -0.419 | 0.026 | 0.058  | <b>0.446</b> | -0.414 | 0.011        |
| LOC365985    | similar to adenylate kinase 5 isoform 1                                                  | -0.419 | 0.019 | 0.206  | <b>0.866</b> | 0.063  | <b>0.614</b> |
| Pxmp2        | peroxisomal membrane protein 2                                                           | -0.419 | 0.021 | -0.167 | <b>0.701</b> | -0.143 | <b>0.644</b> |
| Fam3c        | family with sequence similarity 3, member C                                              | -0.420 | 0.021 | -0.269 | <b>0.914</b> | -0.178 | <b>0.853</b> |
| Soat1        | sterol O-acyltransferase 1                                                               | -0.421 | 0.028 | -0.249 | <b>0.757</b> | -0.145 | <b>0.580</b> |
| Fbxo44       | F-box protein 44                                                                         | -0.421 | 0.023 | -0.418 | 0.009        | -0.376 | 0.018        |
| Col11a1      | collagen, type XI, alpha 1                                                               | -0.422 | 0.020 | -0.089 | <b>0.750</b> | -0.122 | <b>0.852</b> |
| Cacng6       | calcium channel, voltage-dependent, gamma subunit 6                                      | -0.422 | 0.025 | -0.067 | <b>0.643</b> | 0.187  | <b>0.883</b> |
| Steap2       | STEAP family member 2, metalloredutase                                                   | -0.422 | 0.018 | -0.253 | <b>0.781</b> | -0.358 | 0.017        |
| Oas3         | 2'-5'-oligoadenylate synthetase 3                                                        | -0.422 | 0.025 | -0.067 | <b>0.312</b> | -0.096 | <b>0.356</b> |
| Cdh3         | cadherin 3                                                                               | -0.422 | 0.021 | -0.112 | <b>0.773</b> | -0.055 | <b>0.710</b> |
| Fstl3        | follicle-stimulating-like 3 (secreted glycoprotein)                                      | -0.423 | 0.019 | -0.027 | <b>0.583</b> | -0.178 | <b>0.850</b> |
| Cyp2b15      | cytochrome P450, family 2, subfamily b, polypeptide 15                                   | -0.423 | 0.031 | -0.196 | <b>0.653</b> | -0.100 | <b>0.481</b> |
| Sacs         | spastic ataxia of Charlevoix-Saguenay (sacsin)                                           | -0.423 | 0.019 | -0.083 | <b>0.764</b> | -0.073 | <b>0.663</b> |
| Art3         | ADP-ribosyltransferase 3                                                                 | -0.424 | 0.004 | 0.002  | <b>0.597</b> | -0.189 | <b>0.892</b> |
| Krt17        | keratin 17                                                                               | -0.424 | 0.031 | -0.109 | <b>0.442</b> | 0.221  | 0.041        |
| Slit2        | slit homolog 2 (Drosophila)                                                              | -0.424 | 0.020 | 0.107  | <b>0.711</b> | 0.046  | <b>0.691</b> |

|            |                                                                   |        |       |        |              |        |              |
|------------|-------------------------------------------------------------------|--------|-------|--------|--------------|--------|--------------|
| Bdh2       | 3-hydroxybutyrate dehydrogenase, type 2                           | -0.424 | 0.018 | 0.027  | <b>0.450</b> | 0.042  | <b>0.459</b> |
| Abcb1b     | ATP-binding cassette, subfamily B (MDR/TAP), member 1B            | -0.424 | 0.017 | -0.020 | 0.022        | 0.374  | 0.007        |
| Casc4      | cancer susceptibility candidate 4                                 | -0.424 | 0.034 | -0.302 | <b>0.786</b> | -0.303 | <b>0.760</b> |
| Gucy2g     | guanylate cyclase 2G                                              | -0.424 | 0.022 | -0.349 | 0.015        | -0.503 | 0.003        |
| Ldlr       | low density lipoprotein receptor                                  | -0.425 | 0.022 | -0.381 | 0.018        | -0.442 | 0.010        |
| Armcx6     | armadillo repeat containing, X-linked 6                           | -0.425 | 0.022 | -0.351 | 0.019        | -0.254 | <b>0.865</b> |
| Dab2       | disabled homolog 2 (Drosophila)                                   | -0.425 | 0.023 | 0.105  | <b>0.502</b> | 0.115  | <b>0.730</b> |
| Scly       | selenocysteine lyase                                              | -0.425 | 0.015 | -0.291 | 0.037        | -0.259 | <b>0.986</b> |
| Ppfibp2    | PTPRF interacting protein, binding protein 2 (liprin beta 2)      | -0.425 | 0.014 | -0.207 | <b>0.884</b> | -0.175 | <b>0.870</b> |
| Hmgcr      | 3-hydroxy-3-methylglutaryl-CoA reductase                          | -0.425 | 0.021 | -0.408 | 0.012        | -0.314 | 0.022        |
| Lilrc2     | leukocyte immunoglobulin-like receptor, subfamily C, member 2     | -0.425 | 0.020 | -0.036 | <b>0.556</b> | 0.202  | <b>0.874</b> |
| Dnajc15    | DnaJ (Hsp40) homolog, subfamily C, member 15                      | -0.426 | 0.017 | -0.287 | <b>0.957</b> | -0.253 | <b>0.856</b> |
| Mamdc2     | MAM domain containing 2                                           | -0.426 | 0.023 | -0.123 | <b>0.553</b> | -0.134 | <b>0.602</b> |
| Gnmt       | glycine N-methyltransferase                                       | -0.427 | 0.029 | -0.698 | 0.001        | -0.573 | 0.003        |
| Ccr5       | chemokine (C-C motif) receptor 5                                  | -0.428 | 0.007 | -0.203 | <b>0.724</b> | -0.040 | <b>0.405</b> |
| Pcdh8      | protocadherin 8                                                   | -0.428 | 0.022 | -0.569 | 0.002        | -0.227 | <b>0.450</b> |
| Bst2       | bone marrow stromal cell antigen 2                                | -0.428 | 0.017 | 0.028  | <b>0.263</b> | 0.171  | 0.040        |
| Aldh1a1    | aldehyde dehydrogenase 1 family, member A1                        | -0.429 | 0.015 | -0.114 | <b>0.360</b> | -0.384 | 0.011        |
| Sel1l3     | sel-1 suppressor of lin-12-like 3 (C. elegans)                    | -0.429 | 0.023 | -0.444 | 0.006        | -0.235 | <b>0.858</b> |
| Art3       | ADP-ribosyltransferase 3                                          | -0.430 | 0.011 | -0.034 | <b>0.679</b> | -0.137 | <b>0.767</b> |
| Ugp2       | UDP-glucose pyrophosphorylase 2                                   | -0.430 | 0.027 | -0.464 | 0.015        | -0.355 | 0.021        |
| Nr0b2      | nuclear receptor subfamily 0, group B, member 2                   | -0.431 | 0.003 | -0.276 | 0.035        | 0.093  | <b>0.728</b> |
| Pla2g4a    | phospholipase A2, group IVA (cytosolic, calcium-dependent)        | -0.431 | 0.017 | -0.219 | <b>0.900</b> | -0.196 | <b>0.868</b> |
| Dio3       | deiodinase, iodothyronine, type III                               | -0.431 | 0.010 | -0.252 | <b>0.594</b> | 0.052  | <b>0.420</b> |
| Gpx8       | glutathione peroxidase 8                                          | -0.431 | 0.019 | 0.059  | <b>0.720</b> | -0.087 | <b>0.787</b> |
| Efcab4a    | EF-hand calcium binding domain 4A                                 | -0.431 | 0.023 | -0.409 | 0.019        | -0.046 | <b>0.499</b> |
| Foxi1      | forkhead box I1                                                   | -0.431 | 0.042 | -0.133 | <b>0.203</b> | 0.034  | <b>0.123</b> |
| Caly       | calcyon neuron-specific vesicular protein                         | -0.432 | 0.019 | 0.121  | <b>0.732</b> | 0.050  | <b>0.704</b> |
| Clec4b2    | C-type lectin domain family 4, member B2                          | -0.432 | 0.017 | 0.116  | <b>0.579</b> | 0.154  | <b>0.638</b> |
| Aspn       | asporin                                                           | -0.432 | 0.025 | -0.250 | <b>0.853</b> | -0.396 | 0.013        |
| Klra1      | killer cell lectin-like receptor subfamily A, member 1            | -0.432 | 0.009 | 0.066  | <b>0.751</b> | 0.152  | <b>0.919</b> |
| Myl9       | myosin, light chain 9, regulatory                                 | -0.432 | 0.005 | 0.093  | <b>0.591</b> | -0.240 | 0.026        |
| Hoxa9      | homeobox A9                                                       | -0.433 | 0.005 | -0.253 | <b>0.884</b> | 0.144  | <b>0.111</b> |
| Rel2       | RELT-like 2                                                       | -0.433 | 0.016 | -0.062 | <b>0.611</b> | -0.020 | <b>0.537</b> |
| Slc35a1    | solute carrier family 35 (CMP-sialic acid transporter), member A1 | -0.433 | 0.022 | -0.460 | 0.005        | -0.194 | <b>0.745</b> |
| LOC680443  | hypothetical protein LOC680443                                    | -0.434 | 0.021 | 0.013  | <b>0.297</b> | 0.144  | <b>0.783</b> |
| Clec10a    | C-type lectin domain family 10, member A                          | -0.434 | 0.018 | 0.011  | <b>0.544</b> | 0.084  | <b>0.721</b> |
| Kcnj5      | potassium inwardly-rectifying channel, subfamily J, member 5      | -0.434 | 0.025 | -0.577 | 0.003        | -0.549 | 0.003        |
| Pter       | phosphotriesterase related                                        | -0.434 | 0.019 | -0.251 | <b>0.656</b> | -0.201 | <b>0.554</b> |
| Rbpms      | RNA binding protein with multiple splicing                        | -0.435 | 0.016 | -0.025 | <b>0.623</b> | -0.151 | <b>0.851</b> |
| Pbx3       | pre-B-cell leukemia homeobox 3                                    | -0.435 | 0.024 | -0.059 | <b>0.511</b> | -0.094 | <b>0.487</b> |
| Clmp       | CXADR-like membrane protein                                       | -0.435 | 0.023 | 0.023  | <b>0.557</b> | -0.021 | <b>0.433</b> |
| Hck        | hemopoietic cell kinase                                           | -0.436 | 0.017 | 0.182  | <b>0.647</b> | 0.207  | <b>0.657</b> |
| Gpx3       | glutathione peroxidase 3                                          | -0.436 | 0.006 | -0.023 | <b>0.541</b> | -0.087 | <b>0.400</b> |
| LOC680835  | similar to cullin 7                                               | -0.436 | 0.021 | 0.076  | <b>0.690</b> | 0.046  | <b>0.439</b> |
| Itgal      | integrin, alpha L                                                 | -0.436 | 0.013 | -0.072 | <b>0.216</b> | 0.206  | <b>0.067</b> |
| Cacna2d1   | calcium channel, voltage-dependent, alpha2/delta subunit 1        | -0.437 | 0.011 | 0.057  | <b>0.516</b> | 0.139  | <b>0.083</b> |
| Lox        | lysyl oxidase                                                     | -0.437 | 0.019 | 0.010  | <b>0.428</b> | 0.317  | 0.033        |
| Agt        | angiotensinogen (serpin peptidase inhibitor, clade A, member 8)   | -0.438 | 0.033 | 0.084  | <b>0.117</b> | -0.221 | 0.029        |
| MGC116197  | similar to RIKEN cDNA 1700001E04                                  | -0.438 | 0.016 | 0.193  | <b>0.682</b> | 0.175  | <b>0.782</b> |
| Adh4       | alcohol dehydrogenase 4 (class II), pi polypeptide                | -0.438 | 0.013 | -0.458 | 0.003        | -0.049 | <b>0.121</b> |
| RGD1308065 | hypothetical LOC287935                                            | -0.438 | 0.010 | -0.239 | <b>0.968</b> | -0.350 | <b>0.994</b> |
| Apoa1      | apolipoprotein A-I                                                | -0.439 | 0.007 | -1.201 | 0.000        | -0.896 | 0.000        |
| Bpifa2     | BPI fold containing family A, member 2                            | -0.439 | 0.022 | -0.386 | 0.020        | -0.242 | <b>0.904</b> |
| Preli2     | PRELI domain containing 2                                         | -0.439 | 0.010 | -0.509 | 0.003        | -0.193 | <b>0.831</b> |
| Kcnk13     | potassium channel, subfamily K, member 13                         | -0.440 | 0.018 | 0.118  | <b>0.853</b> | 0.106  | <b>0.717</b> |
| Sertad4    | SERTA domain containing 4                                         | -0.440 | 0.020 | -0.049 | <b>0.643</b> | -0.170 | <b>0.891</b> |
| LOC302192  | similar to RIKEN cDNA 1700001E04                                  | -0.440 | 0.016 | 0.167  | <b>0.636</b> | 0.181  | <b>0.584</b> |

|              |                                                                                  |        |       |        |              |        |              |
|--------------|----------------------------------------------------------------------------------|--------|-------|--------|--------------|--------|--------------|
| Nnat         | neuronatin                                                                       | -0.440 | 0.032 | 0.223  | <b>0.781</b> | 0.244  | 0.027        |
| Gpr114       | G protein-coupled receptor 114                                                   | -0.440 | 0.024 | 0.483  | 0.009        | 0.447  | 0.008        |
| Cbln2        | cerebellin 2 precursor                                                           | -0.441 | 0.008 | 0.055  | <b>0.545</b> | -0.021 | <b>0.467</b> |
| Galr2        | galanin receptor 2                                                               | -0.441 | 0.020 | -0.003 | <b>0.634</b> | 0.204  | <b>0.880</b> |
| Podnl1       | podocan-like 1                                                                   | -0.441 | 0.022 | -0.263 | 0.029        | 0.114  | <b>0.051</b> |
| Mixl1        | Mix paired-like homeobox 1                                                       | -0.442 | 0.012 | -0.497 | 0.004        | -0.490 | 0.004        |
| Alpl2        | alkaline phosphatase, placental-like 2                                           | -0.442 | 0.020 | -0.063 | <b>0.539</b> | -0.122 | <b>0.775</b> |
| Flnc         | filamin C, gamma                                                                 | -0.442 | 0.007 | -0.159 | <b>0.289</b> | -0.505 | 0.007        |
| Siglec5      | sialic acid binding Ig-like lectin 5                                             | -0.442 | 0.020 | 0.199  | <b>0.896</b> | 0.108  | <b>0.788</b> |
| Sphkap       | SPHK1 interactor, AKAP domain containing                                         | -0.443 | 0.041 | 0.091  | <b>0.501</b> | 0.110  | <b>0.478</b> |
| RT1-CE10     | RT1 class I, locus CE10                                                          | -0.444 | 0.007 | -0.300 | 0.005        | -0.315 | <b>0.847</b> |
| RGD1359108   | similar to RIKEN cDNA 3110043O21                                                 | -0.444 | 0.014 | -0.137 | <b>0.859</b> | -0.033 | <b>0.676</b> |
| Tsga13       | testis specific, 13                                                              | -0.444 | 0.021 | -0.314 | <b>0.919</b> | -0.071 | <b>0.492</b> |
| Svs6         | seminal vesicle secretory protein 6                                              | -0.444 | 0.025 | -0.248 | <b>0.871</b> | -0.147 | <b>0.714</b> |
| Akap12       | A kinase (PRKA) anchor protein 12                                                | -0.445 | 0.015 | 0.057  | <b>0.778</b> | 0.059  | <b>0.748</b> |
| Hoxa9l       | homeobox A9-like                                                                 | -0.445 | 0.014 | -0.200 | <b>0.842</b> | 0.055  | <b>0.358</b> |
| LOC685157    | similar to paired immunoglobulin-like type 2 receptor beta                       | -0.445 | 0.032 | 0.231  | <b>0.673</b> | 0.295  | 0.037        |
| Tmx4         | thioredoxin-related transmembrane protein 4                                      | -0.446 | 0.020 | -0.179 | <b>0.803</b> | -0.170 | <b>0.797</b> |
| Marveld1     | MARVEL domain containing 1                                                       | -0.447 | 0.015 | -0.074 | <b>0.758</b> | -0.107 | <b>0.782</b> |
| RGD1359508   | similar to protein C33A12.3                                                      | -0.447 | 0.013 | -0.168 | <b>0.611</b> | -0.316 | 0.022        |
| MGC116197    | similar to RIKEN cDNA 1700001E04                                                 | -0.448 | 0.011 | 0.143  | <b>0.704</b> | 0.136  | <b>0.766</b> |
| LOC684055    | hypothetical protein LOC684055                                                   | -0.448 | 0.008 | -0.781 | 0.000        | -0.518 | 0.002        |
| T            | brachyury homolog (mouse)                                                        | -0.448 | 0.018 | -0.161 | <b>0.566</b> | -0.329 | <b>0.827</b> |
| Anp32a       | acidic (leucine-rich) nuclear phosphoprotein 32 family, member A                 | -0.448 | 0.038 | -0.505 | 0.006        | -0.286 | <b>0.613</b> |
| RGD1562344   | similar to Gm566 protein                                                         | -0.448 | 0.015 | -0.262 | 0.022        | -0.213 | <b>0.870</b> |
| Krtap21-2    | keratin associated protein 21-2                                                  | -0.449 | 0.007 | 0.052  | <b>0.290</b> | 0.238  | 0.031        |
| Cfl2         | cofilin 2, muscle                                                                | -0.449 | 0.016 | -0.227 | <b>0.855</b> | -0.362 | 0.012        |
| RGD1560208   | similar to Farnesyl pyrophosphate synthetase (FPP synthetase)                    | -0.449 | 0.006 | -0.312 | 0.035        | -0.141 | <b>0.751</b> |
| Slc5a7       | solute carrier family 5 (choline transporter), member 7                          | -0.449 | 0.013 | -0.050 | <b>0.594</b> | -0.253 | <b>0.937</b> |
| LOC681309    | similar to Thrombospondin-3 precursor                                            | -0.449 | 0.010 | 0.126  | <b>0.850</b> | 0.017  | <b>0.494</b> |
| Syng3        | synaptogyrin 3                                                                   | -0.450 | 0.011 | 0.081  | <b>0.700</b> | 0.033  | <b>0.708</b> |
| Tbxa2r       | thromboxane A2 receptor                                                          | -0.450 | 0.016 | -0.155 | <b>0.898</b> | -0.093 | <b>0.733</b> |
| Pax4         | paired box 4                                                                     | -0.450 | 0.016 | -0.076 | <b>0.411</b> | -0.076 | <b>0.452</b> |
| Csrp2        | cysteine and glycine-rich protein 2                                              | -0.451 | 0.015 | -0.467 | 0.005        | -0.244 | <b>0.796</b> |
| Fdps         | farnesyl diphosphate synthase                                                    | -0.451 | 0.009 | -0.323 | 0.035        | -0.133 | <b>0.641</b> |
| RGD1309085   | similar to F23N19.9                                                              | -0.452 | 0.010 | -0.327 | 0.019        | -0.009 | <b>0.609</b> |
| Fn3k         | fructosamine 3 kinase                                                            | -0.453 | 0.025 | 0.260  | 0.028        | -0.132 | <b>0.338</b> |
| Hs3st2       | heparan sulfate (glucosamine) 3-O-sulfotransferase 2                             | -0.453 | 0.019 | -0.017 | <b>0.381</b> | -0.129 | <b>0.715</b> |
| LOC363306    | hypothetical protein LOC363306                                                   | -0.453 | 0.012 | 0.134  | <b>0.741</b> | 0.126  | <b>0.784</b> |
| Grhpr        | glyoxylate reductase/hydroxypyruvate reductase                                   | -0.454 | 0.018 | -0.239 | <b>0.767</b> | -0.044 | <b>0.445</b> |
| Ppap2b       | phosphatidic acid phosphatase type 2B                                            | -0.454 | 0.033 | -0.139 | <b>0.257</b> | -0.283 | 0.043        |
| Syne1        | spectrin repeat containing, nuclear envelope 1                                   | -0.454 | 0.013 | 0.223  | <b>0.883</b> | -0.119 | <b>0.523</b> |
| Ccl2         | chemokine (C-C motif) ligand 2                                                   | -0.455 | 0.010 | 0.042  | <b>0.222</b> | -0.328 | 0.023        |
| Stx19        | syntaxin 19                                                                      | -0.455 | 0.008 | -0.519 | 0.002        | -0.080 | <b>0.514</b> |
| LOC100125384 | hypothetical protein LOC100125384                                                | -0.455 | 0.019 | -0.073 | <b>0.537</b> | -0.251 | <b>0.761</b> |
| Tst          | thiosulfate sulfurtransferase                                                    | -0.455 | 0.017 | -0.255 | 0.026        | -0.104 | <b>0.271</b> |
| C2cd4b       | C2 calcium-dependent domain containing 4B                                        | -0.455 | 0.015 | -0.821 | 0.000        | -0.841 | 0.000        |
| RGD1564704   | similar to syntaxin 3A                                                           | -0.455 | 0.015 | -0.424 | 0.012        | -0.605 | 0.001        |
| Apol9a       | apolipoprotein L 9a                                                              | -0.456 | 0.015 | -0.508 | 0.006        | -0.576 | 0.003        |
| Spdef        | SAM pointed domain containing ets transcription factor                           | -0.456 | 0.013 | -0.399 | 0.010        | -0.219 | <b>0.911</b> |
| Lrat         | lecithin-retinol acyltransferase (phosphatidylcholine-retinol-O-acyltransferase) | -0.457 | 0.025 | -0.196 | <b>0.542</b> | -0.156 | <b>0.436</b> |
| Chrd         | chordin                                                                          | -0.457 | 0.013 | -0.242 | <b>0.848</b> | -0.147 | <b>0.670</b> |
| Tnnt2        | troponin T type 2 (cardiac)                                                      | -0.457 | 0.006 | -0.060 | <b>0.449</b> | 0.067  | <b>0.643</b> |
| Lims2        | LIM and senescent cell antigen like domains 2                                    | -0.457 | 0.013 | 0.100  | <b>0.668</b> | -0.131 | <b>0.637</b> |
| LOC682835    | similar to putative pheromone receptor (Go-VN5)                                  | -0.458 | 0.019 | 0.064  | <b>0.490</b> | 0.114  | <b>0.668</b> |
| LOC682968    | similar to Retinal homeobox protein Rx (DRx1) (DRx)                              | -0.458 | 0.015 | -0.423 | 0.004        | -0.179 | <b>0.549</b> |
| Efhd1        | EF-hand domain family, member D1                                                 | -0.458 | 0.023 | 0.129  | <b>0.504</b> | -0.079 | <b>0.405</b> |
| LOC498829    | Ab2-143                                                                          | -0.458 | 0.014 | 0.048  | <b>0.523</b> | 0.693  | 0.000        |
| RGD1564516   | similar to smuckler                                                              | -0.458 | 0.040 | 0.036  | 0.011        | 0.042  | 0.044        |

|              |                                                                             |        |       |        |              |        |              |
|--------------|-----------------------------------------------------------------------------|--------|-------|--------|--------------|--------|--------------|
| Cth          | cystathionase (cystathionine gamma-lyase)                                   | -0.459 | 0.017 | -0.327 | 0.012        | 0.077  | <b>0.082</b> |
| C1qtnf3      | C1q and tumor necrosis factor related protein 3                             | -0.459 | 0.007 | -0.182 | <b>0.871</b> | -0.084 | <b>0.645</b> |
| Csf2ra       | granulocyte-macrophage colony stimulating receptor alpha                    | -0.459 | 0.021 | -0.064 | <b>0.541</b> | -0.018 | <b>0.505</b> |
| Rgc32        | response gene to complement 32                                              | -0.460 | 0.012 | -0.442 | 0.006        | -0.316 | <b>0.982</b> |
| Ttl9         | tubulin tyrosine ligase-like family, member 9                               | -0.460 | 0.023 | -0.320 | 0.018        | 0.014  | <b>0.319</b> |
| Wdyhv1       | WDYHV motif containing 1                                                    | -0.460 | 0.015 | -0.266 | <b>0.892</b> | -0.368 | 0.019        |
| MacroD1      | MACRO domain containing 1                                                   | -0.460 | 0.014 | -0.248 | <b>0.967</b> | -0.024 | <b>0.500</b> |
| Slc26a10     | solute carrier family 26, member 10                                         | -0.461 | 0.013 | -0.031 | <b>0.572</b> | 0.103  | <b>0.646</b> |
| LOC685904    | similar to Spetex-2F protein                                                | -0.461 | 0.009 | 0.086  | <b>0.124</b> | 0.248  | 0.039        |
| LOC691995    | hypothetical protein LOC691995                                              | -0.461 | 0.015 | -0.115 | <b>0.855</b> | -0.042 | <b>0.720</b> |
| Fam57b       | family with sequence similarity 57, member B                                | -0.461 | 0.016 | 0.045  | <b>0.420</b> | -0.102 | <b>0.345</b> |
| Itgb1        | integrin, beta-like 1                                                       | -0.461 | 0.007 | -0.089 | <b>0.793</b> | -0.128 | <b>0.798</b> |
| Actn2        | actinin alpha 2                                                             | -0.461 | 0.015 | 0.038  | <b>0.564</b> | -0.212 | <b>0.931</b> |
| Hoxa2        | homeo box A2                                                                | -0.462 | 0.021 | -0.243 | <b>0.720</b> | -0.159 | <b>0.578</b> |
| Penk         | proenkephalin                                                               | -0.463 | 0.012 | 0.040  | <b>0.684</b> | -0.146 | <b>0.820</b> |
| Crem         | cAMP responsive element modulator                                           | -0.464 | 0.015 | -0.313 | 0.032        | -0.566 | 0.001        |
| Ces2j        | carboxylesterase 2J                                                         | -0.464 | 0.011 | -0.210 | <b>0.755</b> | -0.046 | <b>0.477</b> |
| C1qtnf6      | C1q and tumor necrosis factor related protein 6                             | -0.464 | 0.013 | -0.343 | 0.026        | -0.201 | <b>0.897</b> |
| Snap25       | synaptosomal-associated protein 25                                          | -0.465 | 0.012 | -0.036 | <b>0.346</b> | -0.069 | <b>0.433</b> |
| Zfp9         | zinc finger protein 9                                                       | -0.465 | 0.014 | -0.407 | 0.009        | -0.522 | 0.003        |
| Mrpl18       | mitochondrial ribosomal protein L18                                         | -0.466 | 0.014 | -0.318 | 0.023        | -0.570 | 0.001        |
| RGD1309808   | similar to apolipoprotein L2; apolipoprotein L-II                           | -0.466 | 0.013 | -0.396 | 0.016        | -0.188 | <b>0.769</b> |
| Klhdc8a      | kelch domain containing 8A                                                  | -0.467 | 0.008 | -0.493 | 0.004        | -0.209 | 0.032        |
| Cfl2         | cofilin 2, muscle                                                           | -0.467 | 0.008 | -0.235 | <b>0.673</b> | -0.355 | 0.015        |
| Chst8        | carbohydrate (N-acetylgalactosamine 4-O) sulfotransferase 8                 | -0.467 | 0.013 | -0.234 | <b>0.910</b> | -0.363 | 0.023        |
| Styx         | serine/threonine/tyrosine interacting protein                               | -0.468 | 0.011 | -0.315 | <b>0.942</b> | -0.105 | <b>0.582</b> |
| Tpm2         | tropomyosin 2, beta                                                         | -0.468 | 0.009 | -0.156 | <b>0.850</b> | -0.326 | <b>0.954</b> |
| Nexn         | nexilin (F actin binding protein)                                           | -0.468 | 0.010 | -0.018 | <b>0.501</b> | -0.205 | <b>0.751</b> |
| Ppt1         | palmitoyl-protein thioesterase 1                                            | -0.469 | 0.015 | 0.125  | <b>0.639</b> | 0.125  | <b>0.871</b> |
| Crabp1       | cellular retinoic acid binding protein 1                                    | -0.469 | 0.005 | -0.008 | <b>0.237</b> | 0.060  | <b>0.484</b> |
| Cst3         | cystatin C                                                                  | -0.469 | 0.014 | 0.002  | <b>0.541</b> | 0.037  | <b>0.719</b> |
| Slc38a5      | solute carrier family 38, member 5                                          | -0.470 | 0.006 | 0.168  | <b>0.899</b> | 0.062  | <b>0.469</b> |
| Slc6a7       | solute carrier family 6 (neurotransmitter transporter, L-proline), member 7 | -0.470 | 0.013 | -0.173 | <b>0.540</b> | -0.289 | <b>0.719</b> |
| Tac1         | tachykinin 1                                                                | -0.470 | 0.008 | -0.069 | <b>0.445</b> | 0.000  | <b>0.417</b> |
| Tifab        | TRAF-interacting protein with forkhead-associated domain, family member B   | -0.470 | 0.016 | 0.187  | <b>0.455</b> | 0.169  | <b>0.782</b> |
| Fzd2         | frizzled family receptor 2                                                  | -0.470 | 0.008 | -0.178 | <b>0.893</b> | -0.346 | 0.023        |
| Trpc4        | transient receptor potential cation channel, subfamily C, member 4          | -0.471 | 0.005 | -0.243 | <b>0.318</b> | -0.450 | 0.018        |
| Itga7        | integrin, alpha 7                                                           | -0.471 | 0.007 | -0.125 | <b>0.611</b> | -0.260 | <b>0.839</b> |
| Shisa3       | shisa homolog 3 (Xenopus laevis)                                            | -0.472 | 0.009 | 0.030  | <b>0.399</b> | -0.048 | <b>0.526</b> |
| Maob         | monoamine oxidase B                                                         | -0.472 | 0.010 | -0.020 | <b>0.589</b> | 0.023  | <b>0.603</b> |
| Lgi4         | leucine-rich repeat LGI family, member 4                                    | -0.472 | 0.014 | 0.058  | <b>0.645</b> | 0.027  | <b>0.576</b> |
| Rarres1      | retinoic acid receptor responder (tazarotene induced) 1                     | -0.472 | 0.003 | -0.249 | <b>0.360</b> | 0.107  | <b>0.120</b> |
| Cdc42ep3     | CDC42 effector protein (Rho GTPase binding) 3                               | -0.472 | 0.012 | -0.420 | 0.013        | -0.487 | 0.004        |
| Derl3        | Der1-like domain family, member 3                                           | -0.473 | 0.023 | 0.181  | <b>0.654</b> | 0.287  | 0.017        |
| Copz2        | coatamer protein complex, subunit zeta 2                                    | -0.473 | 0.014 | -0.321 | 0.024        | -0.320 | <b>0.889</b> |
| Mrgprx3      | MAS-related GPR, member X3                                                  | -0.473 | 0.027 | 0.165  | <b>0.514</b> | 0.402  | 0.033        |
| Map1b        | microtubule-associated protein 1B                                           | -0.474 | 0.015 | -0.305 | 0.037        | -0.209 | <b>0.667</b> |
| Sync         | syncoilin                                                                   | -0.474 | 0.016 | -0.179 | <b>0.773</b> | -0.177 | <b>0.826</b> |
| Opn4         | opsin 4                                                                     | -0.474 | 0.024 | -0.333 | 0.035        | -0.270 | <b>0.674</b> |
| LOC686318    | similar to NIMA (never in mitosis gene a)-related expressed kinase 5        | -0.475 | 0.007 | -0.463 | 0.005        | -0.090 | <b>0.528</b> |
| LOC100366216 | nuclear antigen Sp100-like                                                  | -0.475 | 0.014 | -0.046 | <b>0.481</b> | 0.156  | <b>0.691</b> |
| LOC686323    | similar to thyroid receptor-interacting protein 6                           | -0.475 | 0.012 | -0.112 | <b>0.889</b> | -0.231 | <b>0.974</b> |
| Nrn1l        | neuritin 1-like                                                             | -0.476 | 0.017 | -0.231 | <b>0.905</b> | -0.144 | <b>0.745</b> |
| Fdps         | farnesyl diphosphate synthase                                               | -0.476 | 0.009 | -0.342 | 0.028        | -0.127 | <b>0.613</b> |
| Bok          | BCL2-related ovarian killer                                                 | -0.477 | 0.014 | -0.375 | 0.021        | -0.348 | 0.027        |
| Ccdc163      | coiled-coil domain containing 163                                           | -0.477 | 0.012 | -0.190 | <b>0.922</b> | -0.127 | <b>0.821</b> |
| C6           | complement component 6                                                      | -0.477 | 0.027 | -0.112 | 0.045        | -0.292 | <b>0.548</b> |
| Prima1       | proline rich membrane anchor 1                                              | -0.477 | 0.014 | -0.166 | <b>0.534</b> | -0.124 | <b>0.419</b> |
| Pkhd11l      | polycystic kidney and hepatic disease 1-like 1                              | -0.478 | 0.018 | 0.099  | <b>0.418</b> | 0.038  | <b>0.432</b> |

|              |                                                                                              |        |       |        |              |        |              |
|--------------|----------------------------------------------------------------------------------------------|--------|-------|--------|--------------|--------|--------------|
| Isg15        | ISG15 ubiquitin-like modifier                                                                | -0.478 | 0.011 | -0.263 | <b>0.720</b> | 0.097  | <b>0.476</b> |
| Fbp1         | fructose-1,6-bisphosphatase 1                                                                | -0.479 | 0.009 | -0.201 | <b>0.936</b> | -0.079 | <b>0.585</b> |
| Fes          | feline sarcoma oncogene                                                                      | -0.479 | 0.014 | -0.103 | <b>0.767</b> | 0.033  | <b>0.681</b> |
| Slc24a3      | solute carrier family 24 (sodium/potassium/calcium exchanger), member 3                      | -0.479 | 0.013 | -0.012 | <b>0.385</b> | -0.105 | <b>0.489</b> |
| Bag2         | Bcl2-associated athanogene 2                                                                 | -0.480 | 0.009 | -0.285 | <b>0.789</b> | -0.475 | 0.007        |
| Slc35c1      | solute carrier family 35, member C1                                                          | -0.480 | 0.012 | -0.277 | 0.016        | -0.263 | <b>0.966</b> |
| Ng23         | Ng23 protein                                                                                 | -0.480 | 0.011 | -0.013 | <b>0.726</b> | -0.019 | <b>0.597</b> |
| LOC100366259 | rCG52099-like                                                                                | -0.480 | 0.011 | -0.094 | <b>0.706</b> | -0.165 | <b>0.907</b> |
| LOC501089    | similar to Discs large homolog 5 (Placenta and prostate DLG) (Discs large protein P-dlg)     | -0.481 | 0.008 | 0.031  | <b>0.402</b> | 0.054  | <b>0.397</b> |
| Aox1         | aldehyde oxidase 1                                                                           | -0.481 | 0.010 | 0.225  | <b>0.946</b> | 0.041  | <b>0.584</b> |
| LOC501222    | similar to Discs large homolog 5 (Placenta and prostate DLG) (Discs large protein P-dlg)     | -0.482 | 0.008 | 0.023  | <b>0.368</b> | 0.021  | <b>0.492</b> |
| Amt          | aminomethyltransferase                                                                       | -0.483 | 0.011 | -0.438 | 0.008        | -0.225 | <b>0.639</b> |
| Fgg          | fibrinogen gamma chain                                                                       | -0.483 | 0.018 | 0.027  | <b>0.166</b> | 0.180  | <b>0.774</b> |
| Cav3         | caveolin 3                                                                                   | -0.483 | 0.010 | -0.215 | <b>0.570</b> | -0.161 | 0.049        |
| Fkbp7        | FK506 binding protein 7                                                                      | -0.483 | 0.012 | -0.033 | <b>0.724</b> | -0.019 | <b>0.558</b> |
| Creb3l4      | cAMP responsive element binding protein 3-like 4                                             | -0.484 | 0.012 | -0.262 | <b>0.949</b> | -0.119 | <b>0.751</b> |
| Grp          | gastrin releasing peptide                                                                    | -0.484 | 0.001 | 0.071  | <b>0.513</b> | 0.049  | <b>0.563</b> |
| Sat2         | spermidine/spermine N1-acetyltransferase family member 2                                     | -0.484 | 0.012 | 0.018  | <b>0.562</b> | -0.088 | <b>0.804</b> |
| P4htm        | prolyl 4-hydroxylase, transmembrane                                                          | -0.485 | 0.008 | -0.141 | <b>0.895</b> | -0.211 | <b>0.955</b> |
| LOC689826    | hypothetical protein LOC689826                                                               | -0.485 | 0.006 | -0.087 | <b>0.471</b> | -0.130 | <b>0.511</b> |
| Zfat         | zinc finger and AT hook domain containing                                                    | -0.485 | 0.011 | -0.214 | <b>0.946</b> | -0.149 | <b>0.833</b> |
| Des          | desmin                                                                                       | -0.485 | 0.007 | -0.215 | <b>0.896</b> | -0.277 | <b>0.826</b> |
| Mpz          | myelin protein zero                                                                          | -0.485 | 0.017 | 0.351  | 0.021        | 0.500  | 0.006        |
| Ms4a4a       | membrane-spanning 4-domains, subfamily A, member 4A                                          | -0.486 | 0.005 | 0.097  | <b>0.488</b> | 0.060  | <b>0.414</b> |
| Epha7        | Eph receptor A7                                                                              | -0.486 | 0.019 | -0.111 | <b>0.204</b> | 0.028  | <b>0.066</b> |
| Hfe          | hemochromatosis                                                                              | -0.486 | 0.013 | -0.252 | <b>0.775</b> | -0.176 | <b>0.629</b> |
| Pxmp2        | peroxisomal membrane protein 2                                                               | -0.487 | 0.009 | -0.230 | <b>0.952</b> | -0.276 | <b>0.965</b> |
| Kcnmb1       | potassium large conductance calcium-activated channel, subfamily M, beta member 1            | -0.487 | 0.008 | -0.081 | <b>0.449</b> | -0.164 | <b>0.586</b> |
| Adamdec1     | ADAM-like, decysin 1                                                                         | -0.488 | 0.004 | 0.131  | <b>0.855</b> | 0.207  | <b>0.839</b> |
| Car9         | carbonic anhydrase 9                                                                         | -0.489 | 0.010 | -0.560 | 0.001        | -0.167 | <b>0.748</b> |
| Schip1       | schwannomin interacting protein 1                                                            | -0.489 | 0.010 | -0.195 | <b>0.942</b> | -0.322 | <b>0.992</b> |
| Sez6         | seizure related 6 homolog (mouse)                                                            | -0.490 | 0.011 | 0.022  | <b>0.691</b> | -0.072 | <b>0.822</b> |
| Noxo1        | NADPH oxidase organizer 1                                                                    | -0.491 | 0.005 | -0.201 | <b>0.830</b> | -0.081 | <b>0.651</b> |
| Kctd14       | potassium channel tetramerisation domain containing 14                                       | -0.491 | 0.012 | -0.374 | 0.012        | -0.278 | <b>0.712</b> |
| Fa2h         | fatty acid 2-hydroxylase                                                                     | -0.491 | 0.005 | -0.580 | 0.000        | -0.133 | 0.017        |
| Enc1         | ectodermal-neural cortex 1                                                                   | -0.491 | 0.009 | -0.737 | 0.000        | -0.783 | 0.000        |
| Lect1        | leukocyte cell derived chemotaxin 1                                                          | -0.491 | 0.010 | -0.294 | <b>0.949</b> | -0.352 | 0.025        |
| Hspb1        | heat shock protein 1                                                                         | -0.492 | 0.005 | -0.023 | <b>0.467</b> | -0.230 | <b>0.873</b> |
| Slc25a25     | solute carrier family 25 (mitochondrial carrier, phosphate carrier), member 25               | -0.492 | 0.010 | -0.332 | 0.031        | -0.617 | 0.001        |
| Slc35f2      | solute carrier family 35, member F2                                                          | -0.492 | 0.012 | -0.053 | <b>0.593</b> | -0.145 | <b>0.837</b> |
| Zbp1         | Z-DNA binding protein 1                                                                      | -0.492 | 0.006 | 0.020  | <b>0.396</b> | 0.242  | <b>0.804</b> |
| C1qc         | complement component 1, q subcomponent, C chain                                              | -0.492 | 0.009 | 0.162  | <b>0.808</b> | 0.132  | <b>0.791</b> |
| Ptpv         | protein tyrosine phosphatase, receptor type, V                                               | -0.492 | 0.007 | -0.285 | <b>0.951</b> | -0.023 | <b>0.581</b> |
| Nsg2         | neuron specific gene family member 2                                                         | -0.493 | 0.014 | -0.287 | 0.038        | -0.227 | <b>0.674</b> |
| Slc4a4       | solute carrier family 4, sodium bicarbonate cotransporter, member 4                          | -0.493 | 0.008 | -0.614 | 0.001        | -0.062 | 0.018        |
| Ppp1cb       | protein phosphatase 1, catalytic subunit, beta isozyme                                       | -0.493 | 0.011 | -0.473 | 0.004        | -0.202 | <b>0.529</b> |
| Ptpla        | protein tyrosine phosphatase-like (proline instead of catalytic arginine), member a          | -0.493 | 0.009 | -0.083 | <b>0.602</b> | -0.231 | <b>0.778</b> |
| Vsig2        | V-set and immunoglobulin domain containing 2                                                 | -0.493 | 0.008 | -0.593 | 0.001        | 0.075  | <b>0.853</b> |
| LOC688090    | similar to RT1 class II histocompatibility antigen, B-1 beta chain precursor (RT1.B-beta(1)) | -0.493 | 0.026 | 0.285  | 0.030        | 0.361  | 0.018        |
| Sstr2        | somatostatin receptor 2                                                                      | -0.493 | 0.006 | -0.823 | 0.000        | -0.547 | 0.002        |
| Padi1        | peptidyl arginine deiminase, type I                                                          | -0.494 | 0.007 | -0.313 | 0.037        | -0.146 | <b>0.824</b> |
| Cd68         | Cd68 molecule                                                                                | -0.495 | 0.012 | 0.169  | <b>0.817</b> | 0.228  | <b>0.902</b> |
| Fmod         | fibromodulin                                                                                 | -0.495 | 0.006 | 0.337  | 0.028        | 0.165  | <b>0.767</b> |

|            |                                                                                         |        |              |        |              |        |              |
|------------|-----------------------------------------------------------------------------------------|--------|--------------|--------|--------------|--------|--------------|
| LOC683626  | similar to limb-bud and heart                                                           | -0.496 | 0.010        | -0.451 | 0.009        | -0.136 | <b>0.587</b> |
| Angptl1    | angiopoietin-like 1                                                                     | -0.496 | 0.017        | -0.247 | <b>0.710</b> | -0.556 | 0.002        |
| Cpz        | carboxypeptidase Z                                                                      | -0.497 | 0.010        | 0.445  | 0.010        | 0.305  | 0.033        |
| Fas        | Fas (TNF receptor superfamily, member 6)                                                | -0.497 | 0.008        | -0.290 | <b>0.989</b> | -0.482 | 0.004        |
| Adh7       | alcohol dehydrogenase 7 (class IV), mu or sigma polypeptide                             | -0.497 | 0.009        | -0.449 | 0.004        | -0.034 | <b>0.255</b> |
| Sacm1l     | SAC1 suppressor of actin mutations 1-like (yeast)                                       | -0.498 | 0.012        | -0.294 | <b>0.812</b> | -0.273 | <b>0.727</b> |
| Gpr55      | G protein-coupled receptor 55                                                           | -0.498 | 0.016        | 0.031  | <b>0.479</b> | 0.001  | <b>0.407</b> |
| Fam64a     | family with sequence similarity 64, member A                                            | -0.499 | 0.009        | -0.556 | 0.002        | -0.247 | 0.044        |
| LOC680236  | hypothetical protein LOC680236                                                          | -0.499 | 0.010        | 0.138  | <b>0.492</b> | 0.105  | <b>0.734</b> |
| LOC683751  | similar to trophinin isoform 1                                                          | -0.499 | 0.015        | -0.019 | <b>0.067</b> | 0.315  | 0.023        |
| Tgfb2      | transforming growth factor, beta 2                                                      | -0.499 | 0.023        | -0.305 | 0.047        | -0.531 | 0.018        |
| Slc4a3     | solute carrier family 4 (anion exchanger), member 3                                     | -0.499 | 0.009        | 0.230  | <b>0.982</b> | -0.015 | <b>0.500</b> |
| LOC685438  | similar to paired immunoglobulin-like type 2 receptor beta                              | -0.500 | 0.030        | 0.179  | <b>0.336</b> | 0.338  | 0.010        |
| Olr664     | olfactory receptor 664                                                                  | -0.500 | 0.012        | -0.024 | <b>0.289</b> | 0.317  | 0.028        |
| Tagln      | transgelin                                                                              | -0.501 | 0.007        | -0.107 | <b>0.751</b> | -0.331 | 0.022        |
| Cd44       | Cd44 molecule                                                                           | -0.501 | 0.009        | -0.649 | 0.001        | -0.357 | 0.019        |
| RGD1310039 | similar to hypothetical protein FLJ10058                                                | -0.501 | 0.026        | -0.498 | 0.018        | -0.079 | <b>0.388</b> |
| Dtnb       | dystrobrevin, beta                                                                      | -0.501 | 0.009        | -0.168 | <b>0.853</b> | 0.020  | <b>0.586</b> |
| RGD1561472 | similar to mKIAA2005 protein                                                            | -0.502 | 0.012        | 0.034  | <b>0.286</b> | 0.090  | <b>0.354</b> |
| Cmpk2      | cytidine monophosphate (UMP-CMP) kinase 2, mitochondrial                                | -0.502 | 0.011        | -0.236 | <b>0.780</b> | -0.143 | <b>0.688</b> |
| Ppt1       | palmitoyl-protein thioesterase 1                                                        | -0.502 | 0.009        | 0.121  | <b>0.633</b> | 0.199  | <b>0.930</b> |
| C1qa       | complement component 1, q subcomponent, A chain                                         | -0.502 | 0.014        | 0.169  | <b>0.757</b> | 0.095  | <b>0.686</b> |
| Fxyd1      | FXYD domain-containing ion transport regulator 1                                        | -0.502 | 0.010        | 0.015  | <b>0.617</b> | 0.035  | <b>0.658</b> |
| LOC691485  | hypothetical protein LOC691485                                                          | -0.503 | 0.014        | -0.171 | <b>0.457</b> | -0.267 | <b>0.790</b> |
| C1qtnf2    | C1q and tumor necrosis factor related protein 2                                         | -0.503 | 0.010        | 0.028  | <b>0.674</b> | -0.088 | <b>0.789</b> |
| Ap1s2      | adaptor-related protein complex 1, sigma 2 subunit                                      | -0.504 | 0.010        | 0.064  | <b>0.620</b> | 0.172  | <b>0.874</b> |
| Fam176a    | family with sequence similarity 176, member A                                           | -0.505 | 0.009        | -0.283 | <b>0.975</b> | -0.298 | <b>0.992</b> |
| LOC681383  | similar to Protein C10orf11 homolog                                                     | -0.505 | 0.013        | -0.019 | <b>0.393</b> | 0.016  | <b>0.481</b> |
| Cpsf4l     | cleavage and polyadenylation specific factor 4-like                                     | -0.505 | 0.027        | -0.515 | 0.011        | -0.032 | <b>0.143</b> |
| Lrrc4      | leucine rich repeat containing 4                                                        | -0.505 | 0.027        | -0.247 | <b>0.458</b> | -0.345 | <b>0.701</b> |
| Lrrn3      | leucine rich repeat neuronal 3                                                          | -0.505 | 0.018        | -0.374 | 0.034        | -0.058 | <b>0.399</b> |
| Nkain4     | Na <sup>+</sup> /K <sup>+</sup> transporting ATPase interacting 4                       | -0.505 | 0.030        | 0.047  | <b>0.408</b> | -0.009 | <b>0.119</b> |
| PVR        | poliovirus receptor                                                                     | -0.506 | 0.006        | -0.419 | 0.011        | -0.425 | 0.009        |
| Car13      | carbonic anhydrase 13                                                                   | -0.506 | 0.011        | -0.574 | 0.001        | -0.296 | 0.018        |
| Kazald1    | Kazal-type serine peptidase inhibitor domain 1                                          | -0.506 | 0.008        | 0.018  | <b>0.671</b> | 0.111  | <b>0.881</b> |
| Lgals3bp   | lectin, galactoside-binding, soluble, 3 binding protein                                 | -0.507 | 0.008        | 0.145  | <b>0.832</b> | 0.128  | <b>0.808</b> |
| Efemp2     | EGF-containing fibulin-like extracellular matrix protein 2                              | -0.508 | 0.010        | 0.110  | <b>0.831</b> | -0.056 | <b>0.618</b> |
| Myoz1      | myozenin 1                                                                              | -0.509 | 0.006        | -0.046 | <b>0.595</b> | -0.175 | <b>0.866</b> |
| Rtp4       | receptor (chemosensory) transporter protein 4                                           | -0.510 | 0.007        | -0.305 | <b>0.939</b> | -0.235 | <b>0.751</b> |
| Pltp       | phospholipid transfer protein                                                           | -0.510 | 0.003        | 0.145  | <b>0.882</b> | 0.207  | <b>0.914</b> |
| RGD1560792 | RGD1560792                                                                              | -0.511 | <b>0.058</b> | 0.240  | 0.009        | 0.059  | 0.023        |
| Serpine2   | serine (or cysteine) peptidase inhibitor, clade E, member 2                             | -0.511 | 0.008        | -0.129 | <b>0.712</b> | -0.112 | <b>0.640</b> |
| Ces1d      | carboxylesterase 1D                                                                     | -0.511 | 0.000        | -0.278 | 0.025        | -1.045 | 0.000        |
| Hif1a      | hypoxia-inducible factor 1, alpha subunit (basic helix-loop-helix transcription factor) | -0.511 | 0.008        | -0.274 | 0.029        | -0.340 | 0.015        |
| Slco6b1    | solute carrier organic anion transporter family, member 6b1                             | -0.511 | 0.022        | -0.409 | 0.026        | -0.177 | <b>0.489</b> |
| Ambp       | alpha-1-microglobulin/bikunin precursor                                                 | -0.512 | 0.006        | -0.087 | <b>0.617</b> | -0.111 | <b>0.577</b> |
| LOC688582  | similar to hemicentin 1                                                                 | -0.513 | 0.010        | 0.026  | <b>0.319</b> | -0.127 | <b>0.462</b> |
| Mptx       | mucosal pentraxin                                                                       | -0.514 | 0.001        | 1.054  | 0.000        | 1.409  | 0.000        |
| Aldh1l2    | aldehyde dehydrogenase 1 family, member L2                                              | -0.514 | 0.008        | -0.281 | 0.027        | -0.206 | <b>0.579</b> |
| Popdc2     | popeye domain containing 2                                                              | -0.514 | 0.005        | -0.057 | <b>0.560</b> | -0.310 | <b>0.986</b> |
| P2ry12     | purinergic receptor P2Y, G-protein coupled, 12                                          | -0.515 | 0.012        | 0.131  | <b>0.644</b> | 0.363  | 0.013        |
| Cd55       | Cd55 molecule                                                                           | -0.515 | 0.011        | -0.214 | 0.044        | 0.258  | 0.008        |
| Pi15       | peptidase inhibitor 15                                                                  | -0.515 | 0.012        | 0.208  | <b>0.363</b> | 0.012  | <b>0.363</b> |
| Nr4a3      | nuclear receptor subfamily 4, group A, member 3                                         | -0.515 | 0.040        | -0.201 | <b>0.327</b> | -0.463 | <b>0.875</b> |

|            |                                                                                                 |        |       |        |              |        |              |
|------------|-------------------------------------------------------------------------------------------------|--------|-------|--------|--------------|--------|--------------|
| Slc39a4    | solute carrier family 39 (zinc transporter), member 4                                           | -0.515 | 0.007 | -0.461 | 0.006        | 0.061  | <b>0.616</b> |
| Exnef      | exonuclease NEF-sp                                                                              | -0.515 | 0.005 | -0.342 | 0.033        | 0.156  | <b>0.763</b> |
| RGD1561916 | similar to testes development-related NYD-SP22 isoform 1                                        | -0.515 | 0.009 | -0.449 | 0.008        | -0.514 | 0.003        |
| Gpc3       | glypican 3                                                                                      | -0.517 | 0.007 | 0.142  | <b>0.745</b> | -0.054 | <b>0.496</b> |
| Azgp1      | alpha-2-glycoprotein 1, zinc-binding                                                            | -0.517 | 0.003 | -0.330 | 0.001        | -1.262 | 0.000        |
| Dmbt1      | deleted in malignant brain tumors 1                                                             | -0.518 | 0.001 | -0.781 | 0.000        | 0.208  | 0.014        |
| Mllt11     | myeloid/lymphoid or mixed-lineage leukemia (trithorax homolog, Drosophila); translocated to, 11 | -0.518 | 0.007 | -0.242 | <b>0.843</b> | -0.363 | <b>0.971</b> |
| Baiap2l2   | BAI1-associated protein 2-like 2                                                                | -0.520 | 0.008 | -0.221 | <b>0.819</b> | 0.013  | <b>0.314</b> |
| Olr1364    | olfactory receptor 1364                                                                         | -0.520 | 0.013 | 0.364  | 0.006        | 0.128  | 0.035        |
| Dcn        | decorin                                                                                         | -0.522 | 0.003 | 0.202  | <b>0.811</b> | -0.035 | <b>0.326</b> |
| RGD1311080 | similar to RIKEN cDNA A930038C07                                                                | -0.522 | 0.016 | -0.100 | <b>0.298</b> | -0.105 | <b>0.284</b> |
| Slc7a10    | solute carrier family 7 (neutral amino acid transporter light chain, asc system), member 10     | -0.522 | 0.014 | 0.095  | <b>0.058</b> | -0.130 | <b>0.054</b> |
| C4bpb      | complement component 4 binding protein, beta                                                    | -0.522 | 0.009 | -0.323 | 0.023        | 0.256  | <b>0.129</b> |
| Klk8       | kallikrein related-peptidase 8                                                                  | -0.523 | 0.008 | -0.214 | 0.031        | 0.058  | <b>0.072</b> |
| Nkd2       | naked cuticle homolog 2 (Drosophila)                                                            | -0.523 | 0.009 | -0.061 | <b>0.652</b> | -0.237 | <b>0.935</b> |
| Dusp27     | dual specificity phosphatase 27 (putative)                                                      | -0.524 | 0.008 | -0.650 | 0.001        | -0.559 | 0.002        |
| Krtap16-5  | keratin associated protein 16-5                                                                 | -0.524 | 0.002 | -0.043 | <b>0.290</b> | 0.216  | <b>0.051</b> |
| RGD1559710 | similar to DC-SIGN                                                                              | -0.524 | 0.008 | -0.055 | <b>0.506</b> | -0.082 | <b>0.602</b> |
| Ntrk3      | neurotrophic tyrosine kinase, receptor, type 3                                                  | -0.525 | 0.008 | 0.198  | <b>0.853</b> | 0.011  | <b>0.276</b> |
| Xirp1      | xin actin-binding repeat containing 1                                                           | -0.525 | 0.041 | -0.663 | 0.004        | -0.232 | 0.021        |
| Mid1ip1    | MID1 interacting protein 1 (gastrulation specific G12 homolog (zebrafish))                      | -0.525 | 0.009 | -0.439 | 0.010        | -0.454 | 0.006        |
| P2ry13     | purinergic receptor P2Y, G-protein coupled, 13                                                  | -0.526 | 0.008 | 0.007  | <b>0.560</b> | 0.046  | <b>0.500</b> |
| Tnnt2      | troponin T type 2 (cardiac)                                                                     | -0.526 | 0.003 | 0.034  | <b>0.484</b> | 0.141  | <b>0.807</b> |
| Best1      | bestrophin 1                                                                                    | -0.527 | 0.028 | -0.637 | 0.004        | -0.121 | <b>0.205</b> |
| Rarres2    | retinoic acid receptor responder (tazarotene induced) 2                                         | -0.528 | 0.005 | 0.145  | <b>0.838</b> | 0.086  | <b>0.418</b> |
| Mx1        | myxovirus (influenza virus) resistance 1                                                        | -0.528 | 0.005 | -0.004 | <b>0.367</b> | 0.242  | <b>0.812</b> |
| Lypd6b     | LY6/PLAUR domain containing 6B                                                                  | -0.529 | 0.036 | -0.444 | 0.036        | -0.205 | <b>0.323</b> |
| LOC499806  | similar to RIKEN cDNA 4933404M02                                                                | -0.530 | 0.034 | -0.299 | <b>0.062</b> | -0.088 | 0.045        |
| Nxph1      | neurexophilin 1                                                                                 | -0.531 | 0.014 | -0.352 | 0.021        | -0.311 | <b>0.831</b> |
| Coq10b     | coenzyme Q10 homolog B (S. cerevisiae)                                                          | -0.532 | 0.006 | -0.282 | <b>0.911</b> | -0.373 | 0.022        |
| Adam28     | ADAM metallopeptidase domain 28                                                                 | -0.533 | 0.012 | -0.305 | <b>0.719</b> | -0.186 | <b>0.463</b> |
| Calcb      | calcitonin-related polypeptide, beta                                                            | -0.533 | 0.005 | -0.037 | <b>0.436</b> | -0.056 | <b>0.513</b> |
| Tgm2       | transglutaminase 2, C polypeptide                                                               | -0.533 | 0.007 | 0.154  | <b>0.816</b> | 0.110  | <b>0.678</b> |
| Fxyd2      | FXYD domain-containing ion transport regulator 2                                                | -0.533 | 0.007 | 0.071  | <b>0.758</b> | 0.018  | <b>0.610</b> |
| Ccna1      | cyclin A1                                                                                       | -0.534 | 0.005 | -0.509 | 0.002        | -0.415 | 0.007        |
| Defb25     | defensin beta 25                                                                                | -0.534 | 0.008 | -0.306 | <b>0.962</b> | -0.268 | <b>0.932</b> |
| Ramp1      | receptor (G protein-coupled) activity modifying protein 1                                       | -0.535 | 0.008 | -0.448 | 0.005        | -0.201 | <b>0.782</b> |
| Pklr       | pyruvate kinase, liver and RBC                                                                  | -0.536 | 0.005 | -0.425 | 0.005        | -0.137 | <b>0.438</b> |
| Lrrc36     | leucine rich repeat containing 36                                                               | -0.538 | 0.007 | -0.356 | 0.029        | -0.161 | <b>0.574</b> |
| LOC362347  | similar to protease, serine, 3 (mesotrypsin)                                                    | -0.538 | 0.005 | 0.012  | 0.000        | -0.148 | 0.004        |
| Fam176a    | family with sequence similarity 176, member A                                                   | -0.538 | 0.007 | -0.331 | 0.031        | -0.229 | <b>0.929</b> |
| Slc35b3    | solute carrier family 35, member B3                                                             | -0.538 | 0.007 | -0.250 | 0.019        | -0.105 | <b>0.347</b> |
| Plp1       | proteolipid protein 1                                                                           | -0.540 | 0.007 | -0.134 | <b>0.813</b> | -0.310 | <b>0.985</b> |
| Eya2       | eyes absent homolog 2 (Drosophila)                                                              | -0.541 | 0.007 | -0.268 | <b>0.903</b> | -0.025 | <b>0.424</b> |
| Rhoq       | ras homolog gene family, member Q                                                               | -0.541 | 0.008 | -0.299 | 0.035        | -0.358 | 0.020        |
| Egf        | epidermal growth factor                                                                         | -0.542 | 0.008 | -0.562 | 0.002        | -0.338 | 0.024        |
| RGD1565161 | similar to dendritic cell-derived immunoglobulin(Ig)-like receptor 1, DlgR1 - mouse             | -0.542 | 0.006 | 0.080  | <b>0.682</b> | -0.055 | <b>0.491</b> |
| Trpc3      | transient receptor potential cation channel, subfamily C, member 3                              | -0.544 | 0.005 | -0.078 | <b>0.808</b> | -0.149 | <b>0.914</b> |
| Fbxl22     | F-box and leucine-rich repeat protein 22                                                        | -0.544 | 0.003 | -0.126 | <b>0.713</b> | -0.092 | <b>0.629</b> |
| Has1       | hyaluronan synthase 1                                                                           | -0.544 | 0.004 | -0.306 | 0.025        | -0.669 | 0.000        |
| RGD1564419 | similar to hypothetical gene supported by BC025338                                              | -0.545 | 0.004 | -0.174 | <b>0.818</b> | -0.104 | <b>0.774</b> |
| Filip1     | filamin A interacting protein 1                                                                 | -0.545 | 0.008 | -0.047 | <b>0.388</b> | -0.458 | 0.010        |
| S100b      | S100 calcium binding protein B                                                                  | -0.546 | 0.016 | 0.165  | <b>0.646</b> | -0.041 | <b>0.323</b> |
| Gdf10      | growth differentiation factor 10                                                                | -0.546 | 0.007 | 0.080  | <b>0.618</b> | 0.125  | <b>0.724</b> |
| Gria4      | glutamate receptor, ionotropic, AMPA 4                                                          | -0.546 | 0.008 | -0.142 | <b>0.614</b> | -0.094 | <b>0.618</b> |
| Plekhb1    | pleckstrin homology domain containing, family B (evectins) member 1                             | -0.547 | 0.007 | 0.138  | <b>0.673</b> | -0.051 | <b>0.615</b> |

|              |                                                                                          |        |              |        |              |        |              |
|--------------|------------------------------------------------------------------------------------------|--------|--------------|--------|--------------|--------|--------------|
| Pkhd11       | polycystic kidney and hepatic disease 1-like 1                                           | -0.547 | 0.005        | -0.063 | <b>0.750</b> | -0.187 | <b>0.861</b> |
| Tspan2       | tetraspanin 2                                                                            | -0.549 | 0.007        | -0.092 | <b>0.596</b> | -0.185 | <b>0.774</b> |
| Adrb3        | adrenergic, beta-3-, receptor                                                            | -0.549 | 0.005        | 0.062  | <b>0.718</b> | -0.257 | <b>0.905</b> |
| C1qb         | complement component 1, q subcomponent, B chain                                          | -0.549 | 0.007        | 0.170  | <b>0.812</b> | 0.121  | <b>0.803</b> |
| Nts          | neurotensin                                                                              | -0.551 | 0.024        | -0.603 | 0.007        | -0.171 | <b>0.333</b> |
| Fam5b        | family with sequence similarity 5, member B                                              | -0.552 | 0.006        | -0.266 | <b>0.945</b> | -0.448 | 0.007        |
| RGD1561574   | similar to Hypothetical protein MGC76322                                                 | -0.552 | 0.007        | -0.539 | 0.003        | -0.267 | 0.004        |
| Stc1         | stanniocalcin 1                                                                          | -0.552 | 0.009        | -0.308 | 0.030        | -0.010 | <b>0.352</b> |
| Hspb8        | heat shock protein B8                                                                    | -0.554 | 0.004        | -0.013 | <b>0.503</b> | -0.268 | <b>0.960</b> |
| Fst          | follicle-stimulating hormone receptor                                                    | -0.555 | 0.005        | 0.445  | 0.003        | 0.613  | 0.000        |
| Mst1         | Macrophage stimulating 1 (hepatocyte growth factor-like)                                 | -0.555 | 0.012        | 0.071  | <b>0.087</b> | -0.279 | <b>0.557</b> |
| Cst6         | cystatin E/M                                                                             | -0.555 | 0.006        | -0.500 | 0.003        | -0.062 | <b>0.384</b> |
| Ldhd         | lactate dehydrogenase B                                                                  | -0.556 | 0.005        | -0.031 | <b>0.726</b> | 0.058  | <b>0.811</b> |
| Slc39a8      | solute carrier family 39 (zinc transporter), member 8                                    | -0.557 | 0.007        | -0.437 | 0.008        | -0.220 | <b>0.753</b> |
| Nppc         | natriuretic peptide C                                                                    | -0.558 | 0.004        | -0.291 | <b>0.972</b> | -0.229 | <b>0.972</b> |
| Spock2       | sparc/osteonectin, cwcv and kazal-like domains proteoglycan 2                            | -0.558 | 0.005        | 0.144  | <b>0.733</b> | 0.173  | <b>0.694</b> |
| LOC301193    | similar to Discs large homolog 5 (Placenta and prostate DLG) (Discs large protein P-dlg) | -0.559 | 0.007        | 0.174  | <b>0.545</b> | 0.167  | <b>0.843</b> |
| Tacr2        | tachykinin receptor 2                                                                    | -0.559 | 0.004        | 0.122  | <b>0.360</b> | -0.024 | <b>0.285</b> |
| Vtn          | vitronectin                                                                              | -0.559 | 0.005        | -0.046 | <b>0.659</b> | -0.179 | <b>0.913</b> |
| Car13        | carbonic anhydrase 13                                                                    | -0.560 | 0.006        | -0.422 | 0.012        | -0.277 | <b>0.808</b> |
| LOC500118    | similar to RIKEN cDNA D330028D13                                                         | -0.560 | 0.007        | -0.385 | 0.021        | -0.406 | 0.015        |
| Prelid2      | PRELI domain containing 2                                                                | -0.561 | 0.005        | -0.391 | 0.007        | -0.157 | <b>0.527</b> |
| Elmod1       | ELMO/CED-12 domain containing 1                                                          | -0.561 | 0.007        | 0.007  | <b>0.224</b> | -0.116 | <b>0.430</b> |
| Vegfb        | vascular endothelial growth factor B                                                     | -0.562 | 0.005        | 0.091  | <b>0.750</b> | -0.036 | <b>0.567</b> |
| Lgals1       | lectin, galactoside-binding, soluble, 1                                                  | -0.562 | 0.005        | 0.065  | <b>0.778</b> | -0.074 | <b>0.650</b> |
| Ltc4s        | leukotriene C4 synthase                                                                  | -0.562 | 0.003        | -0.140 | <b>0.897</b> | -0.205 | <b>0.957</b> |
| Cd44         | Cd44 molecule                                                                            | -0.563 | 0.004        | -0.565 | 0.002        | -0.495 | 0.003        |
| Fam132a      | family with sequence similarity 132, member A                                            | -0.563 | 0.005        | -0.012 | <b>0.506</b> | -0.196 | <b>0.866</b> |
| Ccdc80       | coiled-coil domain containing 80                                                         | -0.563 | 0.004        | 0.389  | 0.017        | 0.004  | <b>0.490</b> |
| RGD1561530   | similar to Tle6 protein                                                                  | -0.563 | 0.005        | -0.399 | 0.009        | -0.356 | 0.022        |
| Cd99l2       | CD99 molecule-like 2                                                                     | -0.564 | 0.005        | -0.652 | 0.000        | -0.210 | <b>0.779</b> |
| Mlxip1       | MLX interacting protein-like                                                             | -0.564 | 0.007        | -0.038 | <b>0.053</b> | 0.229  | 0.027        |
| Kcnh2        | potassium voltage-gated channel, subfamily H (eag-related), member 2                     | -0.564 | 0.007        | -0.062 | <b>0.501</b> | -0.114 | <b>0.510</b> |
| Tbxas1       | thromboxane A synthase 1, platelet                                                       | -0.565 | 0.005        | -0.426 | 0.008        | -0.327 | <b>0.981</b> |
| Spta1        | spectrin, alpha, erythrocytic 1 (elliptocytosis 2)                                       | -0.565 | 0.038        | -0.232 | <b>0.485</b> | -0.048 | <b>0.156</b> |
| LOC100364551 | rCG52842-like                                                                            | -0.566 | 0.006        | -0.460 | 0.005        | -0.331 | 0.027        |
| Fndc1        | fibronectin type III domain containing 1                                                 | -0.567 | 0.003        | 0.083  | <b>0.457</b> | -0.001 | <b>0.338</b> |
| Scd4         | stearoyl-coenzyme A desaturase 4                                                         | -0.567 | 0.025        | 0.037  | <b>0.057</b> | -0.211 | 0.040        |
| Ccl7         | chemokine (C-C motif) ligand 7                                                           | -0.568 | 0.006        | 0.008  | <b>0.325</b> | -0.243 | <b>0.681</b> |
| P2rx2        | purinergic receptor P2X, ligand-gated ion channel, 2                                     | -0.569 | 0.006        | -0.286 | <b>0.881</b> | -0.268 | <b>0.833</b> |
| Ntm          | neurotrimin                                                                              | -0.570 | 0.007        | -0.358 | 0.027        | -0.330 | 0.025        |
| Itih4        | inter alpha-trypsin inhibitor, heavy chain 4                                             | -0.571 | 0.004        | -0.107 | <b>0.609</b> | 0.017  | <b>0.385</b> |
| Prkg2        | protein kinase, cGMP-dependent, type II                                                  | -0.573 | 0.005        | -0.427 | 0.000        | 0.166  | 0.037        |
| Pdk3         | pyruvate dehydrogenase kinase, isozyme 3                                                 | -0.573 | 0.005        | -0.215 | 0.021        | -0.201 | <b>0.568</b> |
| Ttll7        | tubulin tyrosine ligase-like family, member 7                                            | -0.573 | 0.004        | -0.101 | <b>0.731</b> | -0.229 | <b>0.949</b> |
| Gatm         | glycine amidinotransferase (L-arginine:glycine amidinotransferase)                       | -0.574 | 0.005        | -0.128 | <b>0.786</b> | -0.049 | <b>0.655</b> |
| Sec11c       | SEC11 homolog C (S. cerevisiae)                                                          | -0.574 | 0.004        | -0.251 | <b>0.943</b> | -0.119 | <b>0.741</b> |
| Pcsk4        | proprotein convertase subtilisin/kexin type 4                                            | -0.574 | 0.006        | -0.435 | 0.010        | -0.297 | <b>0.881</b> |
| RGD1562667   | similar to leukocyte mono-Ig-like receptor2                                              | -0.575 | 0.004        | -0.061 | <b>0.577</b> | 0.037  | <b>0.476</b> |
| Pla2g4f      | phospholipase A2, group IVF                                                              | -0.577 | <b>0.061</b> | -0.541 | 0.024        | 0.023  | <b>0.087</b> |
| RT1-Bb       | RT1 class II, locus Bb                                                                   | -0.577 | 0.014        | 0.295  | 0.024        | 0.423  | 0.014        |
| Ube2q2l      | ubiquitin-conjugating enzyme E2Q family member 2-like                                    | -0.577 | 0.006        | -0.601 | 0.001        | -0.380 | 0.012        |
| Adam1a       | a disintegrin and metallopeptidase domain 1a                                             | -0.578 | 0.002        | -0.139 | <b>0.838</b> | -0.425 | 0.006        |
| Cnn1         | calponin 1, basic, smooth muscle                                                         | -0.578 | 0.000        | -0.132 | <b>0.674</b> | -0.317 | 0.010        |
| Usp18        | ubiquitin specific peptidase 18                                                          | -0.578 | 0.004        | -0.140 | <b>0.580</b> | 0.037  | <b>0.344</b> |
| Ppic         | peptidylprolyl isomerase C                                                               | -0.578 | 0.004        | -0.191 | <b>0.775</b> | -0.202 | <b>0.793</b> |
| Scarf2       | scavenger receptor class F, member 2                                                     | -0.578 | 0.005        | -0.029 | <b>0.666</b> | -0.093 | <b>0.603</b> |
| Tspan11      | tetraspanin 11                                                                           | -0.578 | 0.003        | 0.067  | <b>0.717</b> | -0.013 | <b>0.567</b> |



|            |                                                                         |        |       |        |              |        |              |
|------------|-------------------------------------------------------------------------|--------|-------|--------|--------------|--------|--------------|
| Bend5      | BEN domain containing 5                                                 | -0.579 | 0.005 | -0.113 | <b>0.523</b> | 0.086  | <b>0.558</b> |
| Muc2       | mucin 2, oligomeric mucus/gel-forming                                   | -0.579 | 0.003 | -0.563 | 0.001        | 0.210  | 0.029        |
| Ly6h       | lymphocyte antigen 6 complex, locus H                                   | -0.579 | 0.007 | 0.080  | <b>0.585</b> | -0.082 | <b>0.628</b> |
| Nell2      | NEL-like 2 (chicken)                                                    | -0.579 | 0.005 | -0.149 | <b>0.605</b> | -0.126 | <b>0.556</b> |
| Zkscan2    | zinc finger with KRAB and SCAN domains 2                                | -0.580 | 0.009 | -0.455 | 0.008        | -0.115 | <b>0.152</b> |
| Dusp1      | dual specificity phosphatase 1                                          | -0.581 | 0.002 | -0.209 | <b>0.721</b> | -0.476 | 0.004        |
| Tpm2       | tropomyosin 2, beta                                                     | -0.581 | 0.004 | 0.137  | <b>0.653</b> | -0.147 | <b>0.838</b> |
| Itih3      | inter-alpha trypsin inhibitor, heavy chain 3                            | -0.581 | 0.003 | 0.049  | <b>0.411</b> | -0.051 | <b>0.618</b> |
| Srcrb4d    | scavenger receptor cysteine rich domain containing, group B (4 domains) | -0.582 | 0.003 | -0.093 | <b>0.265</b> | -0.300 | 0.006        |
| Acad10     | acyl-CoA dehydrogenase family, member 10                                | -0.584 | 0.003 | -0.216 | <b>0.779</b> | -0.385 | 0.013        |
| LOC679119  | similar to bone morphogenetic protein 8b                                | -0.584 | 0.006 | -0.410 | 0.001        | -0.480 | 0.005        |
| Mest       | mesoderm specific transcript homolog (mouse)                            | -0.584 | 0.009 | 0.390  | 0.021        | 0.220  | <b>0.053</b> |
| Casq1      | calsequestrin 1 (fast-twitch, skeletal muscle)                          | -0.584 | 0.004 | -0.173 | <b>0.486</b> | 0.027  | <b>0.402</b> |
| Dpep1      | dipeptidase 1 (renal)                                                   | -0.585 | 0.002 | -0.626 | 0.000        | 0.013  | 0.019        |
| Adra2a     | adrenergic, alpha-2A-, receptor                                         | -0.585 | 0.005 | -0.281 | <b>0.823</b> | -0.266 | 0.022        |
| Ptpro      | protein tyrosine phosphatase, receptor type, O                          | -0.586 | 0.007 | -0.444 | 0.012        | -0.391 | 0.020        |
| Pld4       | phospholipase D family, member 4                                        | -0.586 | 0.003 | -0.013 | <b>0.646</b> | 0.124  | <b>0.680</b> |
| Defa10     | defensin alpha 10                                                       | -0.587 | 0.010 | -0.871 | 0.003        | -0.110 | 0.039        |
| Efhc2      | EF-hand domain (C-terminal) containing 2                                | -0.587 | 0.004 | -0.309 | 0.019        | -0.230 | <b>0.765</b> |
| Sult1c2a   | sulfotransferase family, cytosolic, 1C, member 2a                       | -0.588 | 0.002 | -0.604 | 0.004        | -0.147 | 0.018        |
| Col11a2    | collagen, type XI, alpha 2                                              | -0.589 | 0.004 | 0.186  | <b>0.080</b> | 0.061  | <b>0.331</b> |
| Thbs2      | thrombospondin 2                                                        | -0.590 | 0.003 | -0.026 | <b>0.699</b> | 0.150  | <b>0.791</b> |
| Cyp8b1     | cytochrome P450, family 8, subfamily b, polypeptide 1                   | -0.590 | 0.008 | -0.629 | 0.001        | -0.226 | 0.026        |
| Hbegf      | heparin-binding EGF-like growth factor                                  | -0.592 | 0.004 | -0.489 | 0.006        | -0.601 | 0.002        |
| Plp1       | proteolipid protein 1                                                   | -0.593 | 0.004 | -0.337 | 0.021        | -0.167 | <b>0.923</b> |
| Trpm5      | transient receptor potential cation channel, subfamily M, member 5      | -0.593 | 0.004 | 0.185  | <b>0.062</b> | -0.008 | <b>0.316</b> |
| RGD1559960 | similar to Sulfotransferase K1 (rSULT1C2)                               | -0.596 | 0.004 | -0.475 | 0.005        | -0.241 | 0.026        |
| Sult1c2    | sulfotransferase family, cytosolic, 1C, member 2                        | -0.596 | 0.003 | 0.511  | 0.000        | 0.562  | 0.000        |
| Aoc3       | amine oxidase, copper containing 3 (vascular adhesion protein 1)        | -0.596 | 0.003 | 0.127  | <b>0.902</b> | -0.057 | <b>0.646</b> |
| Tyrobp     | Tyro protein tyrosine kinase binding protein                            | -0.596 | 0.004 | 0.224  | <b>0.823</b> | 0.267  | <b>0.909</b> |
| Cebpe      | CCAAT/enhancer binding protein (C/EBP), epsilon                         | -0.597 | 0.003 | -0.188 | <b>0.940</b> | 0.062  | <b>0.700</b> |
| Gpr37      | G protein-coupled receptor 37                                           | -0.597 | 0.004 | -0.541 | 0.002        | -0.289 | <b>0.933</b> |
| Sp5        | Sp5 transcription factor                                                | -0.597 | 0.005 | -0.674 | 0.001        | -0.163 | 0.042        |
| RGD1307220 | similar to RIKEN cDNA E330026B02                                        | -0.599 | 0.002 | 0.314  | <b>0.951</b> | 0.207  | <b>0.804</b> |
| Hspb7      | heat shock protein family, member 7 (cardiovascular)                    | -0.599 | 0.005 | -0.466 | 0.008        | -0.532 | 0.002        |
| Rgs9       | regulator of G-protein signaling 9                                      | -0.599 | 0.004 | -0.178 | <b>0.643</b> | -0.065 | <b>0.379</b> |
| Mustn1     | musculoskeletal, embryonic nuclear protein 1                            | -0.600 | 0.004 | -0.183 | <b>0.844</b> | -0.254 | <b>0.856</b> |
| Insig1     | insulin induced gene 1                                                  | -0.601 | 0.003 | -0.356 | 0.018        | -0.164 | <b>0.572</b> |
| LOC686151  | similar to cell division cycle associated 5                             | -0.601 | 0.010 | -0.597 | 0.004        | -0.216 | 0.017        |
| RGD1562284 | similar to Glutaminyl-peptide cyclotransferase precursor (QC)           | -0.602 | 0.004 | -0.084 | <b>0.449</b> | -0.140 | <b>0.431</b> |
| LOC690326  | hypothetical protein LOC690326                                          | -0.603 | 0.004 | -0.533 | 0.000        | -0.469 | 0.001        |
| Gpr34      | G protein-coupled receptor 34                                           | -0.603 | 0.003 | -0.164 | <b>0.700</b> | 0.189  | <b>0.916</b> |
| Ckm        | creatine kinase, muscle                                                 | -0.604 | 0.002 | -0.242 | <b>0.823</b> | -0.252 | <b>0.757</b> |
| Cryba2     | crystallin, beta A2                                                     | -0.604 | 0.003 | -0.493 | 0.004        | -0.218 | <b>0.853</b> |
| Cmtm5      | CKLF-like MARVEL transmembrane domain containing 5                      | -0.606 | 0.004 | 0.026  | <b>0.713</b> | -0.004 | <b>0.468</b> |
| Alpl       | alkaline phosphatase, liver/bone/kidney                                 | -0.607 | 0.004 | -0.099 | <b>0.629</b> | -0.258 | <b>0.903</b> |
| LOC685125  | similar to RIKEN cDNA 5031410I06                                        | -0.607 | 0.003 | 0.122  | <b>0.068</b> | -0.449 | 0.006        |
| Asb2       | ankyrin repeat and SOCS box-containing 2                                | -0.607 | 0.004 | 0.268  | <b>0.851</b> | 0.015  | <b>0.316</b> |
| RGD1561849 | similar to RIKEN cDNA 3110035E14                                        | -0.609 | 0.004 | -0.276 | <b>0.938</b> | -0.201 | <b>0.763</b> |
| RGD1565033 | similar to hypothetical protein LOC284018 isoform b                     | -0.609 | 0.003 | -0.509 | 0.005        | -0.402 | 0.007        |
| Agr2       | anterior gradient 2 homolog (Xenopus laevis)                            | -0.610 | 0.004 | -0.360 | 0.006        | -0.422 | 0.004        |
| Ocm        | oncomodulin                                                             | -0.610 | 0.006 | -0.930 | 0.000        | -0.273 | 0.004        |
| LOC685752  | hypothetical protein LOC685752                                          | -0.613 | 0.005 | -0.307 | 0.028        | -0.047 | <b>0.256</b> |
| Slc6a17    | solute carrier family 6 (neurotransmitter transporter), member 17       | -0.613 | 0.007 | -0.162 | <b>0.543</b> | -0.301 | <b>0.765</b> |
| Slc16a7    | solute carrier family 16, member 7 (monocarboxylic acid transporter 2)  | -0.614 | 0.004 | -0.682 | 0.000        | -0.355 | 0.010        |
| Krtap16-5  | keratin associated protein 16-5                                         | -0.615 | 0.002 | -0.028 | <b>0.226</b> | 0.218  | 0.037        |
| LOC689744  | similar to carboxylesterase 2                                           | -0.615 | 0.003 | -0.481 | 0.005        | -0.152 | <b>0.635</b> |

|            |                                                                                  |        |       |        |              |        |              |
|------------|----------------------------------------------------------------------------------|--------|-------|--------|--------------|--------|--------------|
| Nr4a3      | nuclear receptor subfamily 4, group A, member 3                                  | -0.616 | 0.012 | -0.514 | 0.045        | -1.429 | 0.000        |
| RGD1562392 | similar to Sulfotransferase K1 (rSULT1C2)                                        | -0.616 | 0.005 | 0.691  | 0.000        | 0.738  | 0.000        |
| Chst9      | carbohydrate (N-acetylgalactosamine 4-0) sulfotransferase 9                      | -0.616 | 0.003 | -0.441 | 0.006        | -0.325 | 0.019        |
| LOC690020  | similar to killer cell lectin-like receptor, subfamily A, member 17              | -0.616 | 0.004 | -0.135 | <b>0.690</b> | -0.010 | <b>0.419</b> |
| ApoE       | apolipoprotein E                                                                 | -0.617 | 0.042 | 0.315  | 0.005        | 0.306  | 0.005        |
| Wfikn2     | WAP, follistatin/kazal, immunoglobulin, kunitz and netrin domain containing 2    | -0.617 | 0.004 | -0.143 | <b>0.758</b> | -0.124 | <b>0.783</b> |
| Itgb1bp2   | integrin beta 1 binding protein 2                                                | -0.617 | 0.004 | -0.408 | 0.012        | -0.230 | <b>0.746</b> |
| Rxrg       | retinoid X receptor gamma                                                        | -0.617 | 0.004 | 0.034  | <b>0.547</b> | 0.023  | <b>0.506</b> |
| Ramp1      | receptor (G protein-coupled) activity modifying protein 1                        | -0.618 | 0.003 | -0.451 | 0.004        | -0.380 | 0.016        |
| Tmem38a    | transmembrane protein 38a                                                        | -0.618 | 0.003 | -0.117 | <b>0.644</b> | -0.128 | <b>0.770</b> |
| Aldh1b1    | aldehyde dehydrogenase 1 family, member B1                                       | -0.618 | 0.002 | -0.347 | 0.014        | -0.327 | 0.013        |
| Cryab      | crystallin, alpha B                                                              | -0.620 | 0.003 | -0.052 | <b>0.421</b> | -0.428 | 0.011        |
| Slc28a2    | solute carrier family 28 (sodium-coupled nucleoside transporter), member 2       | -0.621 | 0.002 | 0.035  | <b>0.400</b> | 0.088  | <b>0.696</b> |
| Pycard     | PYD and CARD domain containing                                                   | -0.621 | 0.002 | 0.002  | <b>0.196</b> | 0.195  | <b>0.783</b> |
| Pcsk1      | proprotein convertase subtilisin/kexin type 1                                    | -0.621 | 0.003 | 0.120  | <b>0.053</b> | -0.373 | 0.004        |
| Palmd      | palmdelphin                                                                      | -0.623 | 0.005 | -0.494 | 0.004        | -0.652 | 0.001        |
| Preli2     | PRELI domain containing 2                                                        | -0.623 | 0.002 | -0.519 | 0.002        | -0.177 | <b>0.682</b> |
| Tnnt1      | troponin T type 1 (skeletal, slow)                                               | -0.623 | 0.005 | -0.063 | 0.025        | 0.365  | 0.016        |
| Fndc5      | fibronectin type III domain containing 5                                         | -0.624 | 0.003 | -0.052 | <b>0.509</b> | -0.008 | <b>0.581</b> |
| Ptpro      | protein tyrosine phosphatase, receptor type, O                                   | -0.625 | 0.006 | -0.477 | 0.007        | -0.479 | 0.009        |
| Abca8a     | ATP-binding cassette, subfamily A (ABC1), member 8a                              | -0.625 | 0.004 | -0.102 | <b>0.450</b> | -0.214 | <b>0.591</b> |
| Edn3       | endothelin 3                                                                     | -0.626 | 0.014 | -0.573 | 0.010        | -0.460 | 0.011        |
| Aif1       | allograft inflammatory factor 1                                                  | -0.627 | 0.002 | 0.308  | <b>0.927</b> | 0.349  | 0.048        |
| Cd44       | Cd44 molecule                                                                    | -0.628 | 0.003 | -0.791 | 0.000        | -0.550 | 0.002        |
| Muc1       | mucin 1, cell surface associated                                                 | -0.628 | 0.002 | -0.408 | 0.012        | 0.154  | <b>0.669</b> |
| Aqp9       | aquaporin 9                                                                      | -0.628 | 0.002 | 0.156  | <b>0.893</b> | 0.289  | <b>0.051</b> |
| Mmd2       | monocyte to macrophage differentiation-associated 2                              | -0.628 | 0.003 | 0.002  | <b>0.547</b> | -0.043 | <b>0.728</b> |
| Fos        | FBJ osteosarcoma oncogene                                                        | -0.629 | 0.003 | -0.868 | 0.000        | -0.816 | 0.000        |
| Zp2        | zona pellucida glycoprotein 2 (sperm receptor)                                   | -0.630 | 0.002 | -0.180 | 0.008        | 0.256  | 0.001        |
| MGC105567  | similar to cDNA sequence BC023105                                                | -0.630 | 0.001 | 0.126  | <b>0.618</b> | 0.122  | <b>0.728</b> |
| Nucb2      | nucleobindin 2                                                                   | -0.632 | 0.002 | -0.228 | <b>0.913</b> | -0.178 | <b>0.812</b> |
| Tnnt1      | troponin T type 1 (skeletal, slow)                                               | -0.632 | 0.003 | -0.067 | <b>0.463</b> | 0.172  | <b>0.498</b> |
| Adra1a     | adrenergic, alpha-1A-, receptor                                                  | -0.632 | 0.034 | -0.502 | 0.032        | 0.082  | <b>0.091</b> |
| RGD1561459 | similar to RIKEN cDNA 1810020D17                                                 | -0.632 | 0.002 | -0.506 | 0.001        | -0.389 | 0.010        |
| Gucy1a3    | guanylate cyclase 1, soluble, alpha 3                                            | -0.632 | 0.002 | -0.020 | <b>0.360</b> | -0.044 | <b>0.319</b> |
| Gpihbp1    | glycosylphosphatidylinositol anchored high density lipoprotein binding protein 1 | -0.633 | 0.002 | 0.019  | <b>0.429</b> | -0.058 | <b>0.663</b> |
| Lilra5     | leukocyte immunoglobulin-like receptor, subfamily A (with TM domain), member 5   | -0.634 | 0.002 | -0.144 | <b>0.871</b> | 0.148  | <b>0.911</b> |
| Tmem45a    | transmembrane protein 45A                                                        | -0.634 | 0.004 | -0.465 | 0.002        | -0.426 | 0.003        |
| RGD1561551 | similar to Hypothetical protein MGC75664                                         | -0.634 | 0.003 | -0.598 | 0.003        | -0.459 | 0.012        |
| Spock1     | sparc/osteonectin, cwcv and kazal-like domains proteoglycan (testican) 1         | -0.637 | 0.005 | -0.250 | <b>0.538</b> | -0.118 | <b>0.281</b> |
| Tmem72     | transmembrane protein 72                                                         | -0.637 | 0.002 | -0.359 | 0.009        | -0.053 | <b>0.281</b> |
| Ckmt2      | creatine kinase, mitochondrial 2, sarcomeric                                     | -0.637 | 0.002 | -0.326 | 0.037        | 0.118  | <b>0.812</b> |
| Car1       | carbonic anhydrase 1                                                             | -0.637 | 0.003 | -0.272 | 0.000        | 0.239  | 0.003        |
| RGD1311946 | similar to RIKEN cDNA 1810055G02                                                 | -0.638 | 0.006 | -0.467 | 0.004        | -0.464 | 0.007        |
| Fer1l4     | fer-1-like 4 (C. elegans)                                                        | -0.639 | 0.003 | 0.254  | <b>0.392</b> | 0.623  | 0.001        |
| Chgb       | chromogranin B                                                                   | -0.640 | 0.004 | -0.372 | 0.005        | -0.105 | <b>0.279</b> |
| Dgat2      | diacylglycerol O-acyltransferase 2                                               | -0.643 | 0.003 | -0.365 | 0.009        | -0.065 | <b>0.419</b> |
| Zg16       | zymogen granule protein 16                                                       | -0.643 | 0.003 | -0.241 | 0.018        | -0.412 | 0.005        |
| Igf2       | insulin-like growth factor 2                                                     | -0.644 | 0.003 | -0.039 | <b>0.611</b> | 0.090  | <b>0.608</b> |
| C1qtnf9    | C1q and tumor necrosis factor related protein 9                                  | -0.645 | 0.007 | -0.290 | <b>0.690</b> | -0.204 | <b>0.528</b> |
| Cxcr6      | chemokine receptor CXCR6                                                         | -0.645 | 0.018 | -0.257 | <b>0.208</b> | 0.052  | 0.033        |
| Apoa4      | apolipoprotein A-IV                                                              | -0.645 | 0.000 | -1.955 | 0.000        | -1.273 | 0.000        |
| Slc22a1    | solute carrier family 22 (organic cation transporter), member 1                  | -0.646 | 0.002 | -0.159 | <b>0.570</b> | -0.119 | <b>0.467</b> |
| Bag2       | Bcl2-associated athanogene 2                                                     | -0.647 | 0.001 | -0.280 | <b>0.752</b> | -0.482 | 0.004        |
| Mustn1     | musculoskeletal, embryonic nuclear protein 1                                     | -0.647 | 0.002 | -0.166 | <b>0.918</b> | -0.284 | <b>0.980</b> |
| Mmp23      | matrix metalloproteinase 23                                                      | -0.647 | 0.001 | 0.029  | <b>0.463</b> | -0.026 | <b>0.646</b> |
| Myom1      | myomesin 1                                                                       | -0.647 | 0.003 | -0.097 | <b>0.832</b> | -0.096 | <b>0.649</b> |

|              |                                                                                         |        |       |        |              |        |              |
|--------------|-----------------------------------------------------------------------------------------|--------|-------|--------|--------------|--------|--------------|
| LOC681458    | similar to stearyl-coenzyme A desaturase 3                                              | -0.648 | 0.014 | 0.176  | 0.027        | -0.093 | <b>0.091</b> |
| Car11        | carbonic anhydrase 11                                                                   | -0.649 | 0.003 | 0.269  | <b>0.960</b> | 0.005  | <b>0.439</b> |
| MGC109340    | similar to Microsomal signal peptidase 23 kDa subunit (SPase 22 kDa subunit) (SPC22/23) | -0.649 | 0.003 | -0.312 | 0.034        | -0.371 | 0.011        |
| Il1b         | interleukin 1 beta                                                                      | -0.649 | 0.001 | 0.221  | <b>0.361</b> | 0.249  | <b>0.616</b> |
| C2cd4d       | C2 calcium-dependent domain containing 4D                                               | -0.650 | 0.002 | -0.247 | <b>0.927</b> | -0.410 | 0.009        |
| Cpe          | carboxypeptidase E                                                                      | -0.653 | 0.002 | -0.457 | 0.006        | -0.235 | <b>0.843</b> |
| C4b          | complement component 4B (Chido blood group)                                             | -0.654 | 0.002 | 0.226  | 0.021        | 0.415  | 0.003        |
| Klk1c6       | kallikrein 1-related peptidase C6                                                       | -0.654 | 0.003 | -0.662 | 0.000        | -0.244 | 0.028        |
| Isg20        | interferon stimulated exonuclease gene 20                                               | -0.654 | 0.002 | -0.311 | 0.022        | -0.296 | <b>0.940</b> |
| Tmem116      | transmembrane protein 116                                                               | -0.656 | 0.002 | -0.368 | 0.026        | -0.219 | <b>0.795</b> |
| LOC688542    | carboxylesterase 5-like                                                                 | -0.658 | 0.002 | -0.308 | 0.001        | -0.184 | 0.023        |
| RGD1307461   | similar to RIKEN cDNA 6430571L13 gene; similar to g20 protein                           | -0.658 | 0.002 | -0.866 | 0.000        | -0.771 | 0.000        |
| Dner         | delta/notch-like EGF repeat containing                                                  | -0.659 | 0.004 | -0.157 | <b>0.510</b> | -0.025 | <b>0.296</b> |
| Nxph3        | neurexophilin 3                                                                         | -0.659 | 0.005 | -0.110 | <b>0.310</b> | -0.036 | <b>0.250</b> |
| Prr5l        | proline rich 5 like                                                                     | -0.659 | 0.003 | -0.611 | 0.001        | -0.183 | 0.039        |
| Kif6         | kinesin family member 6                                                                 | -0.659 | 0.005 | -0.557 | 0.003        | -0.228 | <b>0.432</b> |
| Noxa1        | NADPH oxidase activator 1                                                               | -0.659 | 0.001 | -0.241 | <b>0.890</b> | -0.110 | <b>0.656</b> |
| Reg4         | regenerating islet-derived family, member 4                                             | -0.660 | 0.002 | -0.262 | <b>0.820</b> | -0.276 | <b>0.783</b> |
| Dpt          | dermatopontin                                                                           | -0.660 | 0.001 | -0.088 | 0.029        | -0.540 | 0.000        |
| Emp1         | epithelial membrane protein 1                                                           | -0.660 | 0.003 | -0.494 | 0.001        | -0.124 | <b>0.053</b> |
| Sparcl1      | SPARC-like 1 (hevin)                                                                    | -0.664 | 0.001 | -0.063 | <b>0.412</b> | -0.156 | <b>0.497</b> |
| Tpm1         | tropomyosin 1, alpha                                                                    | -0.664 | 0.002 | -0.142 | <b>0.674</b> | -0.348 | 0.016        |
| LOC500827    | similar to hypothetical protein FLJ35821                                                | -0.664 | 0.003 | -0.595 | 0.002        | -0.277 | 0.030        |
| Pcp4         | Purkinje cell protein 4                                                                 | -0.665 | 0.000 | -0.151 | <b>0.784</b> | -0.084 | <b>0.513</b> |
| Crym         | crystallin, mu                                                                          | -0.666 | 0.002 | -0.839 | 0.000        | -0.253 | 0.028        |
| Sqle         | squalene epoxidase                                                                      | -0.669 | 0.002 | -0.539 | 0.002        | -0.334 | 0.025        |
| Hspb3        | heat shock protein 3                                                                    | -0.672 | 0.002 | -0.663 | 0.000        | -0.395 | 0.004        |
| Spink8       | serine peptidase inhibitor, Kazal type 8                                                | -0.672 | 0.001 | -0.134 | <b>0.700</b> | -0.140 | <b>0.692</b> |
| Abcb1a       | ATP-binding cassette, sub-family B (MDR/TAP), member 1A                                 | -0.673 | 0.002 | 0.084  | 0.036        | 0.267  | 0.025        |
| Slc28a2      | solute carrier family 28 (sodium-coupled nucleoside transporter), member 2              | -0.673 | 0.002 | -0.083 | <b>0.537</b> | 0.100  | <b>0.830</b> |
| LOC679368    | similar to carboxylesterase 5                                                           | -0.677 | 0.002 | -0.347 | 0.001        | -0.400 | 0.006        |
| RGD1563975   | similar to testis expressed sequence 13B                                                | -0.678 | 0.010 | -0.729 | 0.003        | -0.204 | <b>0.348</b> |
| Mpz          | myelin protein zero                                                                     | -0.679 | 0.021 | -0.583 | 0.013        | -0.103 | <b>0.138</b> |
| Fabp3        | fatty acid binding protein 3, muscle and heart                                          | -0.681 | 0.001 | -0.459 | 0.012        | -0.457 | 0.009        |
| Fxyd6        | FXYD domain-containing ion transport regulator 6                                        | -0.682 | 0.001 | -0.184 | <b>0.852</b> | -0.232 | <b>0.938</b> |
| LOC100363825 | rCG56028-like                                                                           | -0.682 | 0.002 | -0.028 | 0.008        | 0.257  | 0.015        |
| LOC690948    | similar to paired-Ig-like receptor A11                                                  | -0.682 | 0.003 | -0.008 | <b>0.477</b> | 0.021  | <b>0.524</b> |
| LOC690097    | similar to immunoreceptor Ly49si3                                                       | -0.683 | 0.002 | -0.026 | <b>0.344</b> | 0.286  | <b>0.069</b> |
| Upk1b        | uroplakin 1B                                                                            | -0.684 | 0.000 | 0.327  | 0.008        | 0.310  | 0.006        |
| Selm         | selenoprotein M                                                                         | -0.686 | 0.001 | -0.366 | 0.011        | -0.222 | <b>0.783</b> |
| Snhg11       | small nucleolar RNA host gene 11                                                        | -0.686 | 0.001 | 0.296  | <b>0.955</b> | 0.176  | <b>0.733</b> |
| Sytl3        | synaptotagmin-like 3                                                                    | -0.687 | 0.001 | -0.097 | <b>0.700</b> | 0.048  | <b>0.601</b> |
| Tgfb3        | transforming growth factor, beta 3                                                      | -0.687 | 0.003 | -0.187 | <b>0.422</b> | -0.328 | <b>0.689</b> |
| LOC687856    | similar to Myeloid cell surface antigen CD33 precursor (Siglec-3)                       | -0.688 | 0.002 | 0.116  | <b>0.746</b> | 0.161  | <b>0.867</b> |
| LOC499465    | hypothetical protein LOC499465                                                          | -0.688 | 0.002 | -0.302 | 0.027        | -0.305 | <b>0.606</b> |
| Plcd4        | phospholipase C, delta 4                                                                | -0.689 | 0.002 | -0.228 | <b>0.673</b> | -0.250 | <b>0.762</b> |
| Plcd4        | phospholipase C, delta 4                                                                | -0.690 | 0.002 | -0.295 | 0.030        | -0.278 | <b>0.836</b> |
| Abp1         | amiloride binding protein 1 (amine oxidase, copper-containing)                          | -0.693 | 0.002 | -0.211 | <b>0.696</b> | -0.262 | <b>0.760</b> |
| Arc          | activity-regulated cytoskeleton-associated protein                                      | -0.694 | 0.007 | -0.277 | <b>0.469</b> | -0.503 | 0.014        |
| Fxyd2        | FXYD domain-containing ion transport regulator 2                                        | -0.695 | 0.001 | -0.033 | <b>0.364</b> | -0.163 | <b>0.611</b> |
| Tlr11        | toll-like receptor 11                                                                   | -0.697 | 0.001 | 0.116  | <b>0.721</b> | 0.224  | <b>0.808</b> |
| Emr1         | EGF-like module containing, mucin-like, hormone receptor-like 1                         | -0.699 | 0.001 | 0.187  | <b>0.784</b> | 0.133  | <b>0.657</b> |
| Mamdc2       | MAM domain containing 2                                                                 | -0.701 | 0.002 | -0.187 | <b>0.062</b> | -0.218 | 0.048        |
| Igsf11       | immunoglobulin superfamily, member 11                                                   | -0.701 | 0.001 | -0.550 | 0.003        | -0.125 | 0.050        |
| Tlr12        | toll-like receptor 12                                                                   | -0.702 | 0.001 | 0.113  | <b>0.388</b> | 0.377  | 0.028        |
| Ddc          | dopa decarboxylase (aromatic L-amino acid decarboxylase)                                | -0.703 | 0.001 | -0.555 | 0.001        | -0.092 | <b>0.671</b> |
| Mcpt3        | mast cell peptidase 3                                                                   | -0.703 | 0.002 | 0.195  | <b>0.322</b> | 0.507  | 0.005        |
| Olr1566      | olfactory receptor 1566                                                                 | -0.704 | 0.005 | -0.605 | 0.005        | -0.177 | <b>0.325</b> |
| Pbp2         | phosphatidylethanolamine binding protein 2                                              | -0.704 | 0.003 | -0.672 | 0.001        | -0.166 | <b>0.051</b> |

|            |                                                                                     |        |       |        |              |        |              |
|------------|-------------------------------------------------------------------------------------|--------|-------|--------|--------------|--------|--------------|
| Tac2       | tachykinin 2                                                                        | -0.704 | 0.001 | -0.147 | <b>0.871</b> | -0.190 | <b>0.892</b> |
| Ptgs2      | prostaglandin-endoperoxide synthase 2                                               | -0.710 | 0.002 | -0.147 | <b>0.350</b> | -0.219 | <b>0.601</b> |
| Tekt4      | tektin 4                                                                            | -0.711 | 0.004 | -0.608 | 0.001        | -0.136 | 0.010        |
| Srgn       | serglycin                                                                           | -0.711 | 0.001 | -0.022 | <b>0.275</b> | 0.277  | 0.030        |
| Atp6v0a4   | ATPase, H+ transporting, lysosomal V0 subunit A4                                    | -0.712 | 0.002 | -0.448 | 0.006        | -0.262 | 0.031        |
| Pi16       | peptidase inhibitor 16                                                              | -0.712 | 0.002 | -0.180 | <b>0.361</b> | -0.323 | 0.021        |
| LOC685716  | similar to OX-2 membrane glycoprotein precursor (MRC OX-2 antigen) (CD200 antigen)  | -0.712 | 0.001 | -0.490 | 0.004        | 0.049  | <b>0.400</b> |
| Ltbp2      | latent transforming growth factor beta binding protein 2                            | -0.712 | 0.002 | -0.493 | 0.010        | -0.382 | 0.025        |
| Celf3      | CUGBP, Elav-like family member 3                                                    | -0.713 | 0.004 | -0.660 | 0.001        | -0.473 | 0.004        |
| Fcer1g     | Fc fragment of IgE, high affinity I, receptor for; gamma polypeptide                | -0.714 | 0.001 | 0.105  | <b>0.694</b> | 0.122  | <b>0.726</b> |
| Etv5       | ets variant 5                                                                       | -0.715 | 0.002 | -0.704 | 0.000        | -0.382 | 0.008        |
| Artn       | artemin                                                                             | -0.715 | 0.001 | -0.333 | 0.039        | -0.215 | <b>0.934</b> |
| Glycam1    | glycosylation dependent cell adhesion molecule 1                                    | -0.716 | 0.000 | -0.839 | 0.001        | 0.860  | 0.000        |
| Herc6      | hect domain and RLD 6                                                               | -0.719 | 0.001 | -0.159 | <b>0.843</b> | 0.028  | <b>0.626</b> |
| Dnase1l3   | deoxyribonuclease 1-like 3                                                          | -0.720 | 0.002 | 0.313  | 0.027        | 0.413  | 0.011        |
| Inmt       | indolethylamine N-methyltransferase                                                 | -0.722 | 0.002 | -0.167 | <b>0.541</b> | -0.247 | <b>0.696</b> |
| Mfap4      | microfibrillar-associated protein 4                                                 | -0.725 | 0.001 | 0.099  | <b>0.787</b> | 0.003  | <b>0.460</b> |
| Alkbh6     | alkB, alkylation repair homolog 6 (E. coli)                                         | -0.728 | 0.001 | -0.279 | <b>0.951</b> | -0.127 | <b>0.589</b> |
| Tnfrsf11b  | tumor necrosis factor receptor superfamily, member 11b                              | -0.730 | 0.001 | -0.626 | 0.002        | -0.987 | 0.000        |
| Fam5c      | family with sequence similarity 5, member C                                         | -0.730 | 0.002 | -0.219 | 0.036        | -0.348 | <b>0.781</b> |
| Fxyd6      | FXYD domain-containing ion transport regulator 6                                    | -0.733 | 0.001 | -0.174 | <b>0.889</b> | -0.305 | <b>0.974</b> |
| Ifi2712b   | interferon, alpha-inducible protein 27 like 2B                                      | -0.733 | 0.001 | -0.270 | <b>0.516</b> | 0.061  | 0.048        |
| RGD1559482 | similar to immunoglobulin superfamily, member 7                                     | -0.733 | 0.001 | -0.045 | <b>0.660</b> | 0.042  | <b>0.366</b> |
| Slc22a1    | solute carrier family 22 (organic cation transporter), member 1                     | -0.733 | 0.001 | -0.178 | <b>0.635</b> | -0.064 | <b>0.404</b> |
| Ptpns1l3   | protein tyrosine phosphatase, non-receptor type substrate 1-like 3                  | -0.734 | 0.001 | 0.062  | <b>0.732</b> | -0.079 | <b>0.607</b> |
| Nrbp2      | nuclear receptor binding protein 2                                                  | -0.735 | 0.001 | 0.002  | <b>0.577</b> | 0.017  | <b>0.460</b> |
| Ifi2712b   | interferon, alpha-inducible protein 27 like 2B                                      | -0.736 | 0.001 | -0.243 | <b>0.453</b> | 0.016  | <b>0.077</b> |
| Igfbp3     | insulin-like growth factor binding protein 3                                        | -0.737 | 0.001 | 0.285  | <b>0.862</b> | 0.037  | <b>0.397</b> |
| B3gnt6     | UDP-GlcNAc:betaGal beta-1,3-N-acetylglucosaminyltransferase 6 (core 3 synthase)     | -0.737 | 0.002 | -0.548 | 0.003        | -0.425 | 0.013        |
| Efcab6     | EF-hand calcium binding domain 6                                                    | -0.739 | 0.002 | -0.465 | 0.002        | -0.448 | 0.001        |
| Lipt2      | lipoyl(octanoyl) transferase 2 (putative)                                           | -0.740 | 0.016 | -0.790 | 0.003        | -0.218 | 0.022        |
| RGD1561778 | similar to dendritic cell-derived immunoglobulin(Ig)-like receptor 1, DIgR1 - mouse | -0.742 | 0.001 | -0.020 | <b>0.643</b> | 0.138  | <b>0.609</b> |
| Dnajc10    | DnaJ (Hsp40) homolog, subfamily C, member 10                                        | -0.744 | 0.001 | -0.396 | 0.012        | -0.405 | 0.012        |
| RGD1560700 | similar to palmitoyl-protein thioesterase                                           | -0.744 | 0.000 | -1.842 | 0.000        | -1.172 | 0.000        |
| Chrdl2     | chordin-like 2                                                                      | -0.744 | 0.001 | -0.329 | <b>0.877</b> | -0.508 | 0.003        |
| Fam198b    | family with sequence similarity 198, member B                                       | -0.745 | 0.001 | -0.267 | <b>0.888</b> | -0.294 | <b>0.849</b> |
| LOC498480  | similar to Spetex-2C protein                                                        | -0.745 | 0.001 | -0.182 | 0.024        | 0.092  | <b>0.080</b> |
| Casp1      | caspase 1                                                                           | -0.746 | 0.001 | -0.368 | 0.005        | -0.161 | <b>0.545</b> |
| Fkbp11     | FK506 binding protein 11                                                            | -0.749 | 0.001 | -0.583 | 0.002        | -0.283 | <b>0.671</b> |
| Ccnjl      | cyclin J-like                                                                       | -0.750 | 0.001 | -0.341 | 0.022        | -0.071 | <b>0.356</b> |
| RGD1565709 | similar to ovostatin-2                                                              | -0.751 | 0.005 | -0.828 | 0.001        | -0.426 | 0.007        |
| Snap25     | synaptosomal-associated protein 25                                                  | -0.753 | 0.001 | 0.159  | <b>0.482</b> | -0.064 | <b>0.497</b> |
| Ankrd1     | ankyrin repeat domain 1                                                             | -0.753 | 0.004 | -1.022 | 0.000        | -1.264 | 0.000        |
| Msmo1      | methylsterol monooxygenase 1                                                        | -0.754 | 0.001 | -0.476 | 0.006        | -0.232 | <b>0.800</b> |
| Nrbp2      | nuclear receptor binding protein 2                                                  | -0.756 | 0.001 | 0.044  | <b>0.727</b> | 0.024  | <b>0.405</b> |
| RGD1305627 | hypothetical LOC314467                                                              | -0.757 | 0.001 | -0.599 | 0.001        | -0.276 | <b>0.973</b> |
| C3         | complement component 3                                                              | -0.757 | 0.010 | 0.090  | 0.011        | 0.360  | 0.001        |
| RGD1562551 | similar to C20orf82                                                                 | -0.758 | 0.001 | -0.287 | <b>0.747</b> | -0.355 | <b>0.827</b> |
| Nat8l      | N-acetyltransferase 8-like                                                          | -0.759 | 0.003 | 0.121  | <b>0.416</b> | -0.191 | <b>0.379</b> |
| Aif1       | allograft inflammatory factor 1                                                     | -0.759 | 0.001 | 0.225  | <b>0.648</b> | 0.296  | <b>0.056</b> |
| Hrc        | histidine rich calcium binding protein                                              | -0.759 | 0.001 | -0.548 | 0.003        | -0.193 | <b>0.678</b> |
| RGD1305645 | similar to RIKEN cDNA 1500015O10                                                    | -0.760 | 0.001 | -0.067 | <b>0.428</b> | -0.103 | <b>0.741</b> |
| Ccdc19     | coiled-coil domain containing 19                                                    | -0.761 | 0.001 | -0.547 | 0.004        | -0.416 | 0.013        |
| Selm       | selenoprotein M                                                                     | -0.761 | 0.001 | -0.424 | 0.009        | -0.229 | <b>0.816</b> |
| RGD1561459 | similar to RIKEN cDNA 1810020D17                                                    | -0.762 | 0.001 | -0.463 | 0.003        | -0.267 | <b>0.788</b> |
| Muc2       | mucin 2, oligomeric mucus/gel-forming                                               | -0.763 | 0.001 | -0.760 | 0.000        | 0.085  | <b>0.067</b> |
| Klk1c8     | kallikrein 1-related peptidase C8                                                   | -0.763 | 0.001 | -0.724 | 0.000        | -0.404 | 0.008        |
| Umod       | uromodulin                                                                          | -0.763 | 0.001 | -0.440 | 0.006        | -0.392 | 0.013        |
| Cbs        | cystathionine beta synthase                                                         | -0.766 | 0.001 | -0.313 | <b>0.948</b> | -0.169 | <b>0.770</b> |

|            |                                                                      |        |       |        |              |        |              |
|------------|----------------------------------------------------------------------|--------|-------|--------|--------------|--------|--------------|
| Tmem45a    | transmembrane protein 45A                                            | -0.771 | 0.001 | -0.519 | 0.002        | -0.346 | 0.007        |
| Hpgds      | hematopoietic prostaglandin D synthase                               | -0.772 | 0.001 | 0.015  | <b>0.427</b> | 0.139  | <b>0.699</b> |
| Clec4a2    | C-type lectin domain family 4, member A2                             | -0.774 | 0.001 | 0.002  | <b>0.245</b> | 0.013  | <b>0.417</b> |
| Kb23       | type II keratin Kb23                                                 | -0.776 | 0.001 | -0.462 | 0.005        | -0.468 | 0.005        |
| Vipr2      | vasoactive intestinal peptide receptor 2                             | -0.781 | 0.001 | -0.112 | <b>0.628</b> | -0.071 | <b>0.472</b> |
| Htr2b      | 5-hydroxytryptamine (serotonin) receptor 2B                          | -0.781 | 0.001 | -0.034 | <b>0.367</b> | -0.130 | <b>0.521</b> |
| LOC688256  | similar to paired immunoglobulin-like type 2 receptor beta           | -0.781 | 0.017 | -0.883 | 0.003        | -0.037 | <b>0.098</b> |
| Cpxm2      | carboxypeptidase X (M14 family), member 2                            | -0.782 | 0.000 | -0.079 | <b>0.723</b> | -0.080 | <b>0.604</b> |
| Sncg       | synuclein, gamma (breast cancer-specific protein 1)                  | -0.782 | 0.001 | -0.147 | <b>0.765</b> | -0.178 | <b>0.796</b> |
| Gsta3      | glutathione S-transferase A3                                         | -0.783 | 0.001 | 0.139  | <b>0.656</b> | -0.017 | <b>0.466</b> |
| RGD1564571 | similar to DC-SIGN                                                   | -0.783 | 0.006 | -0.084 | 0.049        | 0.150  | 0.016        |
| Adora3     | adenosine A3 receptor                                                | -0.784 | 0.000 | 0.095  | <b>0.647</b> | 0.268  | <b>0.947</b> |
| RT1-T24-1  | RT1 class I, locus T24, gene 1                                       | -0.785 | 0.001 | -0.128 | <b>0.705</b> | -0.225 | <b>0.881</b> |
| Fcer1g     | Fc fragment of IgE, high affinity I, receptor for; gamma polypeptide | -0.786 | 0.001 | -0.016 | <b>0.563</b> | 0.062  | <b>0.649</b> |
| Tac1       | tachykinin 1                                                         | -0.788 | 0.000 | -0.163 | <b>0.586</b> | -0.128 | <b>0.634</b> |
| Chst4      | carbohydrate (N-acetylglucosamine 6-O) sulfotransferase 4            | -0.788 | 0.001 | -0.695 | 0.000        | -0.165 | <b>0.698</b> |
| Sik1       | salt-inducible kinase 1                                              | -0.789 | 0.001 | -1.043 | 0.000        | -1.256 | 0.000        |
| LOC690020  | similar to killer cell lectin-like receptor, subfamily A, member 17  | -0.789 | 0.001 | -0.065 | <b>0.542</b> | -0.116 | <b>0.562</b> |
| F13a1      | coagulation factor XIII, A1 polypeptide                              | -0.792 | 0.001 | 0.010  | <b>0.405</b> | 0.057  | <b>0.461</b> |
| Tmprss8    | transmembrane protease, serine 8                                     | -0.792 | 0.000 | -0.626 | 0.001        | -0.458 | 0.003        |
| Myh8       | myosin, heavy chain 8, skeletal muscle, perinatal                    | -0.794 | 0.000 | -0.812 | 0.000        | -0.793 | 0.000        |
| Rcan1      | regulator of calcineurin 1                                           | -0.799 | 0.001 | -0.432 | 0.018        | -0.707 | 0.000        |
| Adra1d     | adrenergic, alpha-1D-, receptor                                      | -0.803 | 0.004 | -0.365 | 0.021        | -0.367 | 0.020        |
| Txn1       | thioredoxin 1                                                        | -0.803 | 0.000 | -0.091 | 0.005        | -0.297 | 0.014        |
| Hoxa10     | homeo box A10                                                        | -0.805 | 0.002 | -0.181 | 0.031        | -0.177 | 0.041        |
| Abo2       | histo-blood group ABO system transferase 2                           | -0.807 | 0.001 | -0.579 | 0.001        | -0.096 | <b>0.058</b> |
| Prdx6      | peroxiredoxin 6                                                      | -0.807 | 0.001 | -0.687 | 0.000        | 0.005  | 0.045        |
| Tmed6      | transmembrane emp24 protein transport domain containing 6            | -0.808 | 0.001 | -0.465 | 0.004        | -0.129 | <b>0.053</b> |
| Klk1       | kallikrein 1                                                         | -0.809 | 0.001 | -0.637 | 0.000        | -0.286 | 0.018        |
| Dnmt3l     | DNA (cytosine-5-)-methyltransferase 3-like                           | -0.810 | 0.000 | -0.185 | <b>0.614</b> | 0.074  | <b>0.426</b> |
| Gpc2       | glypican 2                                                           | -0.810 | 0.000 | -0.328 | 0.032        | -0.210 | <b>0.669</b> |
| Sostdc1    | sclerostin domain containing 1                                       | -0.811 | 0.000 | -0.288 | <b>0.967</b> | -0.253 | <b>0.977</b> |
| Sult1c2a   | sulfotransferase family, cytosolic, 1C, member 2a                    | -0.811 | 0.000 | -0.610 | 0.001        | -0.289 | 0.007        |
| LOC680029  | similar to Spetex-2F protein                                         | -0.817 | 0.001 | -0.205 | 0.012        | -0.092 | <b>0.059</b> |
| Trdn       | triadin                                                              | -0.817 | 0.001 | -0.156 | <b>0.380</b> | 0.267  | 0.016        |
| Itm2a      | integral membrane protein 2A                                         | -0.819 | 0.000 | 0.234  | <b>0.938</b> | 0.053  | <b>0.665</b> |
| Cbr1       | carbonyl reductase 1                                                 | -0.821 | 0.001 | -0.455 | 0.004        | -0.493 | 0.003        |
| Clec9a     | C-type lectin domain family 9, member A                              | -0.826 | 0.000 | 0.011  | <b>0.389</b> | 0.368  | 0.033        |
| Chmp4b1    | chromatin modifying protein 4B-like 1                                | -0.826 | 0.003 | -1.149 | 0.000        | -1.016 | 0.000        |
| LOC688173  | similar to Telethonin (Titin cap protein)                            | -0.829 | 0.001 | -0.372 | 0.034        | -0.112 | <b>0.055</b> |
| Klra17     | killer cell lectin-like receptor, subfamily A, member 17             | -0.829 | 0.001 | 0.000  | <b>0.317</b> | 0.381  | 0.035        |
| Abra       | actin-binding Rho activating protein                                 | -0.830 | 0.000 | -0.490 | 0.006        | -0.664 | 0.000        |
| C7         | complement component 7                                               | -0.838 | 0.000 | 0.152  | <b>0.679</b> | 0.222  | <b>0.915</b> |
| Klk1c7     | kallikrein 1-related peptidase C7                                    | -0.839 | 0.001 | -0.724 | 0.000        | -0.309 | 0.020        |
| Wfdc1      | WAP four-disulfide core domain 1                                     | -0.842 | 0.000 | -0.650 | 0.001        | -0.249 | <b>0.922</b> |
| Ltbp2      | latent transforming growth factor beta binding protein 2             | -0.844 | 0.000 | -0.663 | 0.001        | -0.597 | 0.001        |
| Ddc        | dopa decarboxylase (aromatic L-amino acid decarboxylase)             | -0.853 | 0.000 | -0.621 | 0.001        | -0.143 | <b>0.862</b> |
| Pdgfrl     | platelet-derived growth factor receptor-like                         | -0.853 | 0.000 | -0.228 | <b>0.619</b> | -0.132 | <b>0.379</b> |
| Rsad2      | radical S-adenosyl methionine domain containing 2                    | -0.854 | 0.001 | -0.174 | 0.001        | 0.814  | 0.000        |
| RGD1563091 | similar to OEF2                                                      | -0.855 | 0.001 | -0.267 | <b>0.596</b> | 0.066  | <b>0.062</b> |
| Rpa3       | replication protein A3                                               | -0.856 | 0.000 | -0.678 | 0.000        | -0.413 | 0.007        |
| Cgref1     | cell growth regulator with EF hand domain 1                          | -0.863 | 0.001 | -0.758 | 0.000        | -0.442 | 0.003        |
| Pygm       | phosphorylase, glycogen, muscle                                      | -0.864 | 0.000 | -0.146 | <b>0.823</b> | -0.051 | <b>0.601</b> |
| Akap5      | A kinase (PRKA) anchor protein 5                                     | -0.867 | 0.000 | -0.169 | <b>0.840</b> | -0.180 | <b>0.856</b> |
| Lpl        | lipoprotein lipase                                                   | -0.868 | 0.000 | -0.102 | <b>0.481</b> | -0.299 | <b>0.879</b> |
| Rcan1      | regulator of calcineurin 1                                           | -0.873 | 0.000 | -0.478 | 0.011        | -0.673 | 0.001        |
| Actg2      | actin, gamma 2, smooth muscle, enteric                               | -0.874 | 0.001 | -0.469 | 0.029        | -0.643 | 0.005        |
| Gsg1l      | GSG1-like                                                            | -0.876 | 0.000 | -0.200 | <b>0.677</b> | -0.180 | <b>0.627</b> |

|            |                                                                                                        |        |       |        |              |        |              |
|------------|--------------------------------------------------------------------------------------------------------|--------|-------|--------|--------------|--------|--------------|
| Tubal3     | tubulin, alpha-like 3                                                                                  | -0.878 | 0.001 | -1.052 | 0.000        | -0.193 | 0.002        |
| LOC494527  | 11 kDa protein 2                                                                                       | -0.879 | 0.001 | -0.951 | 0.000        | -0.962 | 0.000        |
| Ctxn3      | cortixin 3                                                                                             | -0.880 | 0.000 | -0.421 | 0.013        | -0.106 | <b>0.486</b> |
| Muc2       | mucin 2, oligomeric mucus/gel-forming                                                                  | -0.884 | 0.000 | -0.534 | 0.002        | -0.243 | 0.013        |
| Zcchc12    | zinc finger, CCHC domain containing 12                                                                 | -0.884 | 0.001 | -0.526 | 0.002        | -0.286 | 0.017        |
| LOC691277  | similar to Robo-1                                                                                      | -0.885 | 0.000 | -0.429 | 0.004        | 0.054  | 0.018        |
| Lix1       | Lix1 homolog (chicken)                                                                                 | -0.885 | 0.000 | 0.008  | <b>0.522</b> | -0.074 | <b>0.719</b> |
| Grhpr      | glyoxylate reductase/hydroxypyruvate reductase                                                         | -0.890 | 0.000 | -0.717 | 0.000        | -0.328 | 0.010        |
| Rgs5       | regulator of G-protein signaling 5                                                                     | -0.891 | 0.000 | -0.383 | 0.006        | -0.223 | <b>0.723</b> |
| Abhd16b    | abhydrolase domain containing 16B                                                                      | -0.892 | 0.023 | -1.153 | 0.004        | -0.859 | 0.015        |
| Nr4a1      | nuclear receptor subfamily 4, group A, member 1                                                        | -0.895 | 0.000 | -0.729 | 0.000        | -1.407 | 0.000        |
| Cldn15     | claudin 15                                                                                             | -0.895 | 0.000 | -0.679 | 0.000        | -0.346 | 0.006        |
| Ptn        | pleiotrophin                                                                                           | -0.895 | 0.000 | 0.051  | <b>0.361</b> | -0.084 | <b>0.587</b> |
| Cd5l       | Cd5 molecule-like                                                                                      | -0.903 | 0.018 | 0.222  | 0.043        | 0.016  | 0.015        |
| LOC686384  | similar to Kif19A CG9913-PB, isoform B                                                                 | -0.903 | 0.021 | -0.889 | 0.009        | -0.324 | 0.024        |
| Etv5       | ets variant 5                                                                                          | -0.910 | 0.000 | -0.785 | 0.000        | -0.577 | 0.001        |
| Clec4a3    | C-type lectin domain family 4, member A3                                                               | -0.912 | 0.000 | -0.220 | <b>0.746</b> | 0.086  | <b>0.513</b> |
| Alox12e    | arachidonate 12-lipoxygenase, epidermal                                                                | -0.914 | 0.000 | -0.203 | <b>0.765</b> | 0.194  | <b>0.809</b> |
| Ms4a7      | membrane-spanning 4-domains, subfamily A, member 7                                                     | -0.916 | 0.000 | 0.386  | 0.013        | 0.387  | 0.007        |
| Rgs11      | regulator of G-protein signaling 11                                                                    | -0.916 | 0.000 | 0.115  | <b>0.390</b> | -0.291 | 0.014        |
| Rec8       | REC8 homolog (yeast)                                                                                   | -0.918 | 0.000 | -0.714 | 0.000        | -0.078 | <b>0.345</b> |
| Cd52       | CD52 antigen                                                                                           | -0.920 | 0.000 | 0.011  | <b>0.535</b> | 0.442  | 0.012        |
| RGD1562533 | similar to mKIAA0774 protein                                                                           | -0.922 | 0.000 | -0.511 | 0.005        | -0.419 | 0.009        |
| Clec11a    | C-type lectin domain family 11, member A                                                               | -0.924 | 0.000 | 0.009  | <b>0.371</b> | -0.024 | <b>0.216</b> |
| Itln1      | intelectin 1 (galactofuranose binding)                                                                 | -0.929 | 0.000 | 0.021  | 0.022        | 0.713  | 0.000        |
| Btg4       | B-cell translocation gene 4                                                                            | -0.930 | 0.004 | -1.054 | 0.001        | -0.157 | 0.015        |
| Fcnb       | ficolin B                                                                                              | -0.932 | 0.009 | -0.382 | 0.022        | 0.090  | 0.049        |
| Fabp2      | fatty acid binding protein 2, intestinal                                                               | -0.933 | 0.000 | -0.696 | 0.000        | -0.242 | 0.009        |
| Slamf9     | SLAM family member 9                                                                                   | -0.934 | 0.000 | -0.027 | <b>0.488</b> | 0.135  | <b>0.656</b> |
| Hmgcs1     | 3-hydroxy-3-methylglutaryl-CoA synthase 1 (soluble)                                                    | -0.939 | 0.000 | -0.747 | 0.000        | -0.426 | 0.005        |
| Serpinf1   | serpin peptidase inhibitor, clade F (alpha-2 antiplasmin, pigment epithelium derived factor), member 1 | -0.941 | 0.000 | -0.003 | <b>0.535</b> | -0.168 | <b>0.792</b> |
| F3         | coagulation factor III (thromboplastin, tissue factor)                                                 | -0.942 | 0.000 | -0.586 | 0.001        | -0.554 | 0.001        |
| Tff2       | trefoil factor 2                                                                                       | -0.943 | 0.001 | -0.817 | 0.000        | -0.455 | 0.002        |
| Epsti1     | epithelial stromal interaction 1 (breast)                                                              | -0.944 | 0.000 | -0.526 | 0.002        | -0.280 | <b>0.791</b> |
| LOC494527  | 11 kDa protein 2                                                                                       | -0.945 | 0.002 | -0.363 | 0.012        | -0.114 | 0.029        |
| Spp1       | secreted phosphoprotein 1                                                                              | -0.945 | 0.000 | -0.702 | 0.000        | -0.199 | <b>0.744</b> |
| Actg2      | actin, gamma 2, smooth muscle, enteric                                                                 | -0.946 | 0.000 | -0.512 | 0.018        | -0.583 | 0.007        |
| Bpifb6     | BPI fold containing family B, member 6                                                                 | -0.946 | 0.000 | -0.674 | 0.000        | -0.385 | 0.002        |
| Sectm1a    | secreted and transmembrane 1A                                                                          | -0.959 | 0.000 | -0.167 | <b>0.754</b> | -0.033 | <b>0.451</b> |
| Tapbp1     | TAP binding protein-like                                                                               | -0.960 | 0.013 | -1.189 | 0.001        | -1.409 | 0.001        |
| Il12a      | interleukin 12A                                                                                        | -0.965 | 0.000 | -0.384 | 0.013        | -0.650 | 0.000        |
| Cacna1h    | calcium channel, voltage-dependent, T type, alpha 1H subunit                                           | -0.965 | 0.001 | -0.431 | 0.012        | -0.209 | 0.023        |
| G0s2       | G0/G1switch 2                                                                                          | -0.967 | 0.000 | -0.115 | <b>0.691</b> | -0.334 | <b>0.978</b> |
| Cox6a2     | cytochrome c oxidase subunit VIa polypeptide 2                                                         | -0.971 | 0.000 | -0.463 | 0.004        | -0.215 | <b>0.862</b> |
| Olr621     | olfactory receptor 621                                                                                 | -0.972 | 0.019 | -0.751 | 0.020        | -0.235 | <b>0.101</b> |
| Idi1       | isopenentenyl-diphosphate delta isomerase 1                                                            | -0.973 | 0.000 | -0.821 | 0.000        | -0.354 | 0.016        |
| Aldob      | aldolase B, fructose-bisphosphate                                                                      | -0.973 | 0.000 | -0.443 | 0.001        | 0.043  | 0.024        |
| Derl3      | Der1-like domain family, member 3                                                                      | -0.975 | 0.000 | 0.181  | <b>0.671</b> | 0.661  | 0.001        |
| Steap1     | six transmembrane epithelial antigen of the prostate 1                                                 | -0.975 | 0.000 | -0.830 | 0.000        | -0.575 | 0.001        |
| LOC691277  | similar to Robo-1                                                                                      | -0.976 | 0.000 | -0.490 | 0.002        | 0.086  | 0.022        |
| Cndp1      | carnosine dipeptidase 1 (metallopeptidase M20 family)                                                  | -0.978 | 0.000 | -0.429 | 0.004        | -0.215 | 0.025        |
| Masp1      | mannan-binding lectin serine peptidase 1                                                               | -0.979 | 0.018 | -0.804 | 0.028        | -0.194 | 0.040        |
| RT1-CE5    | RT1 class I, locus CE5                                                                                 | -0.980 | 0.001 | -0.509 | 0.028        | -0.717 | 0.004        |
| Gpr149     | G protein-coupled receptor 149                                                                         | -0.981 | 0.000 | -0.490 | 0.001        | -0.589 | 0.001        |
| Nkg7       | natural killer cell group 7 sequence                                                                   | -0.981 | 0.000 | -0.027 | <b>0.633</b> | 0.070  | <b>0.683</b> |
| Cyp4f40    | cytochrome P450, family 4, subfamily f, polypeptide 40                                                 | -0.981 | 0.000 | -0.444 | 0.000        | 0.058  | 0.003        |
| Cd5l       | Cd5 molecule-like                                                                                      | -0.983 | 0.028 | 0.285  | 0.018        | 0.075  | 0.031        |
| Ctgf       | connective tissue growth factor                                                                        | -0.984 | 0.000 | -0.153 | 0.001        | -0.618 | 0.000        |

|            |                                                                                                                          |        |       |        |              |        |              |
|------------|--------------------------------------------------------------------------------------------------------------------------|--------|-------|--------|--------------|--------|--------------|
| Capn8      | calpain 8                                                                                                                | -0.997 | 0.000 | -0.587 | 0.002        | -0.125 | 0.047        |
| KIFC2      | kinesin family member C2                                                                                                 | -0.998 | 0.000 | -0.453 | 0.007        | -0.171 | <b>0.836</b> |
| Syce2      | synaptonemal complex central element protein 2                                                                           | -1.000 | 0.029 | -1.117 | 0.002        | 0.028  | <b>0.087</b> |
| Chga       | chromogranin A                                                                                                           | -1.011 | 0.000 | -0.328 | 0.001        | -0.133 | 0.041        |
| Smpx       | small muscle protein, X-linked                                                                                           | -1.016 | 0.000 | -0.349 | 0.025        | -0.381 | 0.018        |
| Myl2       | myosin, light polypeptide 2, regulatory, cardiac, slow                                                                   | -1.019 | 0.000 | -0.940 | 0.000        | -0.823 | 0.000        |
| Ptgis      | prostaglandin I2 (prostacyclin) synthase                                                                                 | -1.026 | 0.000 | -0.370 | 0.015        | -0.173 | <b>0.515</b> |
| Cfd        | complement factor D (adipsin)                                                                                            | -1.037 | 0.000 | -0.087 | <b>0.070</b> | 0.009  | 0.038        |
| Msln       | mesothelin                                                                                                               | -1.041 | 0.000 | 0.382  | 0.000        | 0.377  | 0.001        |
| LOC360228  | WDNM1 homolog                                                                                                            | -1.041 | 0.000 | 0.559  | 0.001        | 0.231  | 0.005        |
| Kcnj5      | potassium inwardly-rectifying channel, subfamily J, member 5                                                             | -1.043 | 0.000 | -1.062 | 0.000        | -0.766 | 0.000        |
| Car3       | carbonic anhydrase 3                                                                                                     | -1.045 | 0.000 | 0.278  | 0.004        | -0.263 | 0.004        |
| Slpil2     | antileukoproteinase-like 2                                                                                               | -1.050 | 0.000 | 0.102  | <b>0.233</b> | 0.425  | 0.020        |
| Ca2        | carbonic anhydrase 2                                                                                                     | -1.055 | 0.000 | -0.551 | 0.000        | -0.087 | 0.028        |
| Rgs2       | regulator of G-protein signaling 2                                                                                       | -1.055 | 0.000 | -0.909 | 0.000        | -0.845 | 0.000        |
| Rgs2       | regulator of G-protein signaling 2                                                                                       | -1.059 | 0.000 | -0.856 | 0.001        | -0.760 | 0.001        |
| Mfsd2a     | major facilitator superfamily domain containing 2A                                                                       | -1.059 | 0.000 | -0.455 | 0.011        | -0.262 | <b>0.852</b> |
| Tnfrsf12a  | tumor necrosis factor receptor superfamily, member 12a                                                                   | -1.059 | 0.000 | -0.600 | 0.003        | -1.353 | 0.000        |
| Car8       | carbonic anhydrase 8                                                                                                     | -1.060 | 0.000 | -0.525 | 0.002        | -0.339 | 0.010        |
| Sln3       | schlafen 3                                                                                                               | -1.060 | 0.000 | 0.308  | 0.018        | 0.362  | 0.009        |
| Mybpc2     | myosin binding protein C, fast-type                                                                                      | -1.064 | 0.000 | -0.459 | 0.011        | -0.353 | <b>0.929</b> |
| Gcnt3      | glucosaminyl (N-acetyl) transferase 3, mucin type                                                                        | -1.071 | 0.000 | -0.549 | 0.003        | -0.183 | 0.015        |
| Mrap       | melanocortin 2 receptor accessory protein                                                                                | -1.072 | 0.001 | -0.045 | 0.036        | -0.363 | 0.032        |
| Tmprss9    | transmembrane protease, serine 9                                                                                         | -1.072 | 0.000 | -1.083 | 0.000        | -0.683 | 0.000        |
| Tmprss9    | transmembrane protease, serine 9                                                                                         | -1.077 | 0.000 | -1.024 | 0.000        | -0.582 | 0.001        |
| Gldn       | gliomedin                                                                                                                | -1.085 | 0.000 | -0.522 | 0.003        | -0.161 | <b>0.694</b> |
| Hsd3b6     | hydroxy-delta-5-steroid dehydrogenase, 3 beta- and steroid delta-isomerase 6                                             | -1.086 | 0.000 | -0.518 | 0.000        | -0.228 | 0.000        |
| Casq1      | calsequestrin 1 (fast-twitch, skeletal muscle)                                                                           | -1.086 | 0.000 | -0.436 | 0.011        | -0.282 | <b>0.886</b> |
| RGD1560314 | RGD1560314                                                                                                               | -1.089 | 0.008 | -0.959 | 0.003        | -0.119 | <b>0.081</b> |
| RGD1309651 | similar to 1190005I06Rik protein                                                                                         | -1.094 | 0.000 | -0.426 | 0.017        | -0.103 | <b>0.630</b> |
| Ly49i2     | Ly49 inhibitory receptor 2                                                                                               | -1.102 | 0.001 | -0.604 | 0.002        | -1.177 | 0.000        |
| Tph1       | tryptophan hydroxylase 1                                                                                                 | -1.102 | 0.000 | -0.603 | 0.001        | -0.298 | 0.025        |
| LOC363060  | similar to RIKEN cDNA 1600029D21                                                                                         | -1.108 | 0.000 | -0.829 | 0.000        | -0.616 | 0.001        |
| Gsta5      | glutathione S-transferase Yc2 subunit                                                                                    | -1.111 | 0.000 | -0.107 | <b>0.608</b> | 0.033  | <b>0.357</b> |
| LOC688635  | similar to Spetex-2F protein                                                                                             | -1.113 | 0.000 | -0.189 | 0.015        | -0.038 | <b>0.085</b> |
| RGD1562035 | similar to mast cell protease 1-like 3 precursor                                                                         | -1.116 | 0.000 | -0.261 | <b>0.774</b> | 0.046  | <b>0.522</b> |
| Kif1c      | kinesin family member 1C                                                                                                 | -1.125 | 0.007 | -0.943 | 0.005        | -0.701 | 0.046        |
| LOC687842  | similar to Cytochrome P450 2C24 (CYP11C24) (P450-PROS2)                                                                  | -1.126 | 0.000 | -0.830 | 0.000        | -0.489 | 0.000        |
| Scx        | scleraxis                                                                                                                | -1.131 | 0.000 | -0.368 | 0.022        | -0.413 | 0.018        |
| Ccl11      | chemokine (C-C motif) ligand 11                                                                                          | -1.133 | 0.000 | -0.413 | 0.016        | -0.028 | <b>0.364</b> |
| Slc13a1    | solute carrier family 13 (sodium/sulfate symporters), member 1                                                           | -1.134 | 0.000 | -0.585 | 0.001        | -0.301 | 0.017        |
| Ccr10      | chemokine (C-C motif) receptor 10                                                                                        | -1.137 | 0.000 | 0.036  | <b>0.110</b> | 0.419  | 0.004        |
| Mzb1       | marginal zone B and B1 cell-specific protein                                                                             | -1.140 | 0.000 | 0.064  | 0.042        | 0.772  | 0.000        |
| Ms4a2      | membrane-spanning 4-domains, subfamily A, member 2 (Fc fragment of IgE, high affinity I, receptor for; beta polypeptide) | -1.144 | 0.000 | -0.127 | <b>0.555</b> | 0.012  | <b>0.402</b> |
| Rup2       | urinary protein 2                                                                                                        | -1.145 | 0.009 | -1.201 | 0.000        | -0.220 | 0.030        |
| Rrad       | Ras-related associated with diabetes                                                                                     | -1.150 | 0.000 | -0.320 | 0.036        | -0.193 | <b>0.418</b> |
| Fbln7      | fibulin 7                                                                                                                | -1.156 | 0.000 | -0.540 | 0.001        | -0.398 | 0.009        |
| Bpifb6     | BPI fold containing family B, member 6                                                                                   | -1.156 | 0.000 | -0.825 | 0.000        | -0.560 | 0.000        |
| Cd55       | Cd55 molecule                                                                                                            | -1.162 | 0.000 | -0.438 | 0.005        | -0.237 | 0.044        |
| F2         | coagulation factor II                                                                                                    | -1.165 | 0.000 | -0.640 | 0.000        | -0.315 | 0.012        |
| Fabp4      | fatty acid binding protein 4, adipocyte                                                                                  | -1.170 | 0.000 | -0.233 | 0.047        | -0.334 | 0.013        |
| Myom2      | myomesin 2                                                                                                               | -1.171 | 0.000 | -0.772 | 0.000        | -0.257 | 0.025        |
| RGD1305928 | hypothetical LOC300207                                                                                                   | -1.180 | 0.000 | -0.851 | 0.000        | -0.388 | 0.005        |
| Slc18a1    | solute carrier family 18 (vesicular monoamine), member 1                                                                 | -1.184 | 0.000 | -0.791 | 0.000        | -0.599 | 0.001        |
| Rgs1       | regulator of G-protein signaling 1                                                                                       | -1.184 | 0.000 | -0.675 | 0.001        | -0.604 | 0.001        |
| Dapl1      | death associated protein-like 1                                                                                          | -1.196 | 0.000 | -0.753 | 0.003        | -0.375 | 0.025        |
| Tmem22     | transmembrane protein 22                                                                                                 | -1.199 | 0.000 | -0.583 | 0.000        | -0.419 | 0.002        |
| Ccl12      | chemokine (C-C motif) ligand 12                                                                                          | -1.212 | 0.000 | 0.206  | 0.010        | 0.243  | 0.006        |

|            |                                                                              |        |       |        |              |        |              |
|------------|------------------------------------------------------------------------------|--------|-------|--------|--------------|--------|--------------|
| Siglec1    | sialic acid binding Ig-like lectin 1, sialoadhesin                           | -1.213 | 0.000 | 0.130  | <b>0.672</b> | 0.102  | <b>0.849</b> |
| Fcgr3a     | Fc fragment of IgG, low affinity IIIa, receptor                              | -1.230 | 0.000 | -0.225 | <b>0.934</b> | 0.136  | <b>0.683</b> |
| LOC686141  | similar to Spetex-2C protein                                                 | -1.230 | 0.000 | -0.200 | 0.006        | 0.140  | 0.033        |
| Me1        | malic enzyme 1, NADP(+)-dependent, cytosolic                                 | -1.231 | 0.000 | -0.451 | 0.008        | -0.309 | 0.014        |
| LOC683753  | hypothetical protein LOC683753                                               | -1.232 | 0.004 | -0.795 | 0.034        | -0.121 | <b>0.057</b> |
| Bhlha15    | basic helix-loop-helix family, member a15                                    | -1.233 | 0.000 | -0.496 | 0.006        | -0.067 | 0.033        |
| LOC688507  | similar to Spetex-2F protein                                                 | -1.238 | 0.000 | -0.184 | 0.010        | 0.110  | 0.049        |
| H19        | H19, imprinted maternally expressed transcript (non-protein coding)          | -1.242 | 0.000 | -0.227 | <b>0.052</b> | -0.317 | 0.025        |
| Fcer1a     | Fc fragment of IgE, high affinity I, receptor for; alpha polypeptide         | -1.249 | 0.000 | -0.326 | 0.032        | -0.234 | <b>0.850</b> |
| Cxcl11     | chemokine (C-X-C motif) ligand 11                                            | -1.260 | 0.000 | -0.859 | 0.000        | -0.267 | 0.006        |
| Rgs4       | regulator of G-protein signaling 4                                           | -1.262 | 0.000 | -0.570 | 0.003        | -0.720 | 0.000        |
| Ces2c      | carboxylesterase 2C                                                          | -1.269 | 0.000 | -0.944 | 0.000        | -0.445 | 0.002        |
| Fut9       | fucosyltransferase 9 (alpha (1,3) fucosyltransferase)                        | -1.270 | 0.000 | -0.997 | 0.000        | -0.334 | 0.003        |
| Srpk3      | SRSF protein kinase 3                                                        | -1.272 | 0.000 | -0.242 | <b>0.776</b> | -0.042 | <b>0.491</b> |
| RGD1560949 | similar to testis nuclear RNA-binding protein-like                           | -1.273 | 0.000 | -1.471 | 0.000        | -1.135 | 0.000        |
| Npw        | neuropeptide W                                                               | -1.276 | 0.000 | -0.777 | 0.000        | -0.406 | 0.002        |
| Rbp4       | retinol binding protein 4, plasma                                            | -1.283 | 0.000 | -0.026 | <b>0.059</b> | -0.205 | 0.015        |
| Olfm4      | olfactomedin 4                                                               | -1.291 | 0.000 | -0.826 | 0.000        | 0.002  | <b>0.082</b> |
| Mt3        | metallothionein 3                                                            | -1.298 | 0.000 | -0.631 | 0.001        | -0.372 | 0.012        |
| Casq2      | calsequestrin 2 (cardiac muscle)                                             | -1.298 | 0.000 | -0.643 | 0.001        | -0.218 | <b>0.835</b> |
| Hsd3b5     | hydroxy-delta-5-steroid dehydrogenase, 3 beta- and steroid delta-isomerase 5 | -1.302 | 0.000 | -0.648 | 0.000        | -0.340 | 0.001        |
| Gsta5      | glutathione S-transferase Yc2 subunit                                        | -1.308 | 0.000 | -0.560 | 0.001        | -0.158 | <b>0.448</b> |
| Pln        | phospholamban                                                                | -1.309 | 0.000 | -0.384 | 0.001        | -0.349 | 0.010        |
| Nox1       | NADPH oxidase 1                                                              | -1.313 | 0.000 | -0.256 | 0.024        | 0.207  | 0.023        |
| Me1        | malic enzyme 1, NADP(+)-dependent, cytosolic                                 | -1.324 | 0.000 | -0.443 | 0.009        | -0.264 | <b>0.853</b> |
| Casc4      | cancer susceptibility candidate 4                                            | -1.334 | 0.000 | -0.688 | 0.000        | -0.715 | 0.000        |
| LOC682360  | hypothetical protein LOC682360                                               | -1.335 | 0.000 | -0.459 | 0.000        | -0.314 | 0.001        |
| Sln        | sarcolipin                                                                   | -1.360 | 0.000 | -0.649 | 0.001        | -0.410 | 0.004        |
| RGD1563231 | similar to immunoglobulin kappa-chain VK-1                                   | -1.370 | 0.000 | -0.170 | 0.040        | -0.580 | 0.001        |
| Slpi       | secretory leukocyte peptidase inhibitor                                      | -1.378 | 0.000 | 0.188  | <b>0.186</b> | 0.552  | 0.006        |
| RGD1562127 | similar to chromosome 11 open reading frame 9                                | -1.382 | 0.000 | -0.687 | 0.000        | -0.360 | 0.018        |
| Sgcg       | sarcoglycan, gamma (dystrophin-associated glycoprotein)                      | -1.386 | 0.000 | -0.884 | 0.000        | -0.543 | 0.002        |
| RGD1565970 | similar to mast cell protease 8                                              | -1.386 | 0.000 | -0.165 | <b>0.509</b> | 0.310  | 0.024        |
| LOC685106  | similar to ribosomal protein L6                                              | -1.390 | 0.000 | 0.215  | 0.007        | -0.613 | 0.000        |
| Hdc        | histidine decarboxylase                                                      | -1.393 | 0.000 | -0.281 | <b>0.982</b> | -0.076 | <b>0.791</b> |
| Retnlb     | resistin like beta                                                           | -1.420 | 0.000 | 1.223  | 0.000        | 1.939  | 0.000        |
| RGD1565374 | similar to hypothetical protein LOC199675                                    | -1.430 | 0.000 | -0.901 | 0.000        | -0.378 | 0.010        |
| Apobec2    | apolipoprotein B mRNA editing enzyme, catalytic polypeptide-like 2           | -1.436 | 0.000 | -0.613 | 0.001        | -0.243 | <b>0.804</b> |
| Sypl2      | synaptophysin-like 2                                                         | -1.457 | 0.000 | -0.801 | 0.000        | -0.867 | 0.000        |
| Fcer1a     | Fc fragment of IgE, high affinity I, receptor for; alpha polypeptide         | -1.497 | 0.000 | -0.248 | <b>0.795</b> | -0.283 | <b>0.824</b> |
| Hsd17b6    | hydroxysteroid (17-beta) dehydrogenase 6                                     | -1.503 | 0.000 | -0.988 | 0.000        | -0.325 | 0.001        |
| RGD1565970 | similar to mast cell protease 8                                              | -1.509 | 0.000 | -0.198 | 0.028        | 0.413  | 0.009        |
| Tph1       | tryptophan hydroxylase 1                                                     | -1.518 | 0.000 | -0.642 | 0.001        | -0.305 | 0.016        |
| Mcpt1l4    | mast cell protease 1-like 4                                                  | -1.530 | 0.000 | -0.217 | <b>0.840</b> | 0.081  | <b>0.722</b> |
| Cfb        | complement factor B                                                          | -1.551 | 0.000 | 0.167  | 0.013        | 0.560  | 0.001        |
| Sln3       | schlafen 3                                                                   | -1.558 | 0.000 | 0.166  | <b>0.551</b> | 0.249  | 0.018        |
| Retnlg     | resistin-like gamma                                                          | -1.560 | 0.000 | -0.018 | <b>0.528</b> | 0.509  | 0.005        |
| LOC679045  | Ig gamma chain segment                                                       | -1.562 | 0.000 | -0.216 | 0.004        | -0.234 | 0.001        |
| Cma1       | chymase 1, mast cell                                                         | -1.583 | 0.000 | -0.288 | <b>0.636</b> | 0.256  | 0.040        |
| Cpa3       | carboxypeptidase A3, mast cell                                               | -1.609 | 0.000 | -0.258 | 0.028        | -0.115 | <b>0.480</b> |
| Retnla     | resistin like alpha                                                          | -1.627 | 0.000 | 0.878  | 0.000        | 1.162  | 0.000        |
| Cyp4f1     | cytochrome P450, family 4, subfamily f, polypeptide 1                        | -1.634 | 0.000 | -0.582 | 0.000        | 0.169  | 0.000        |
| Npc1l1     | NPC1 (Niemann-Pick disease, type C1, gene)-like 1                            | -1.662 | 0.000 | -1.294 | 0.000        | -0.707 | 0.000        |
| Tff1       | trefoil factor 1                                                             | -1.663 | 0.000 | -0.786 | 0.000        | -0.310 | 0.001        |
| Atf3       | activating transcription factor 3                                            | -1.681 | 0.000 | -1.015 | 0.000        | -1.715 | 0.000        |
| Fabp1      | fatty acid binding protein 1, liver                                          | -1.682 | 0.000 | -0.780 | 0.000        | -0.074 | 0.001        |
| Tnfrsf17   | tumor necrosis factor receptor superfamily, member 17                        | -1.690 | 0.000 | -0.139 | <b>0.172</b> | 0.572  | 0.001        |
| Spink4     | serine peptidase inhibitor, Kazal type 4                                     | -1.714 | 0.000 | -2.376 | 0.000        | -1.237 | 0.000        |



|              |                                                  |        |       |        |              |        |              |
|--------------|--------------------------------------------------|--------|-------|--------|--------------|--------|--------------|
| LOC100360169 | rCG21044-like                                    | -1.718 | 0.000 | 0.232  | 0.004        | 1.101  | 0.000        |
| Ros1         | c-ros oncogene 1 , receptor tyrosine kinase      | -1.733 | 0.000 | -1.914 | 0.000        | -1.672 | 0.000        |
| Thrsp        | thyroid hormone responsive                       | -1.747 | 0.000 | -0.067 | 0.004        | -0.380 | 0.001        |
| RatNP-3b     | defensin RatNP-3 precursor                       | -1.761 | 0.000 | -2.005 | 0.000        | -0.576 | 0.002        |
| RGD1564563   | similar to SIGNR4                                | -1.793 | 0.000 | -0.383 | 0.007        | -0.092 | <b>0.672</b> |
| Mcpt8        | mast cell protease 8                             | -1.824 | 0.000 | -0.324 | 0.010        | 0.315  | 0.023        |
| Mcpt8l3      | mast cell protease 8-like 3                      | -1.824 | 0.000 | -0.462 | 0.004        | 0.151  | <b>0.564</b> |
| Adipoq       | adiponectin, C1Q and collagen domain containing  | -1.826 | 0.000 | 0.053  | 0.007        | -0.265 | 0.002        |
| Mcpt9        | mast cell protease 9                             | -1.834 | 0.000 | -0.384 | 0.006        | 0.240  | <b>0.057</b> |
| Mcpt4        | mast cell protease 4                             | -1.952 | 0.000 | 0.233  | 0.025        | 0.296  | 0.039        |
| Mcpt1        | mast cell protease 1                             | -1.966 | 0.000 | -0.014 | <b>0.058</b> | 0.285  | 0.018        |
| Mcpt10       | mast cell protease 10                            | -1.985 | 0.000 | -0.523 | 0.002        | 0.192  | <b>0.727</b> |
| LOC100359793 | mCG1050586-like                                  | -1.987 | 0.000 | -0.141 | 0.019        | 1.137  | 0.000        |
| Scd1         | stearoyl-Coenzyme A desaturase 1                 | -1.998 | 0.000 | 0.138  | 0.002        | -0.400 | 0.000        |
| Mcpt8l2      | mast cell protease 8-like 2                      | -2.003 | 0.000 | -0.532 | 0.002        | 0.196  | <b>0.877</b> |
| Pga5         | pepsinogen 5, group I                            | -2.086 | 0.000 | -1.394 | 0.000        | -0.775 | 0.000        |
| Gkn2         | gastrokine 2                                     | -2.099 | 0.000 | -1.000 | 0.000        | -1.584 | 0.000        |
| Mcpt1l4      | mast cell protease 1-like 4                      | -2.170 | 0.000 | -0.112 | 0.049        | 0.239  | 0.034        |
| RGD1562035   | similar to mast cell protease 1-like 3 precursor | -2.179 | 0.000 | -0.248 | 0.020        | 0.176  | <b>0.624</b> |
| Pzp          | pregnancy-zone protein                           | -2.223 | 0.000 | -1.221 | 0.000        | -1.117 | 0.000        |
| Fcrls        | Fc receptor-like 5, scavenger receptor           | -2.342 | 0.000 | -0.529 | 0.001        | 0.208  | 0.018        |
| Bpifb2       | BPI fold containing family B, member 2           | -2.508 | 0.000 | -1.532 | 0.000        | -1.300 | 0.000        |
| Mcpt2        | mast cell protease 2                             | -2.545 | 0.000 | -0.290 | 0.030        | 0.255  | <b>0.053</b> |
| Tac4         | tachykinin 4                                     | -2.766 | 0.000 | -1.731 | 0.000        | -1.279 | 0.000        |
